# Supplementary material for: Polymer Matrix Drives Dual Phosphorescence in Dispersed Chromophores
Source: Research Square preprint supplement (doi:10.21203/rs.3.rs-5794027/v1), 2025-02-13
Supplement: Supplementary file 1 [file e4a5fb14c0ce7a259976cf81.xlsx]

## Sheet: Fig. 2a
Ex=390 nm
BANHPh	Steady-state 298K	Phos 298K	Phos 77K			BANMePh	Steady-state 298K	Phos 298K	Phos 77K			BANH2	Steady-state 298K	Phos 298K	Phos 77K
Wavelength	Intensity	Intensity	Intensity			Wavelength	Intensity	Intensity	Intensity			Wavelength	Intensity	Intensity	Intensity
400	0.06763		0.0069			400	0.05064	0.02431	0.00341			400	0.09478	0.07159	0.02034
401	0.07913		0.00699			401	0.05881	0.03093	0.00342			401	0.10504	0.08054	0.02038
402	0.09059		0.00708			402	0.06878	0.03857	0.00344			402	0.1174	0.09307	0.02036
403	0.101		0.00716			403	0.07877	0.04725	0.00346			403	0.13205	0.10273	0.02026
404	0.11949		0.00723			404	0.09177	0.05696	0.00348			404	0.14415	0.11723	0.02031
405	0.13229	0.06983	0.00729			405	0.1054	0.0677	0.0035			405	0.16168	0.13011	0.02035
406	0.15137	0.08795	0.00735			406	0.11966	0.07796	0.00356			406	0.17537	0.14451	0.02027
407	0.17411	0.1066	0.0074			407	0.13637	0.08955	0.00362			407	0.19433	0.16111	0.02026
408	0.19542	0.1258	0.00745			408	0.15446	0.10234	0.00367			408	0.21167	0.17612	0.02025
409	0.21501	0.14554	0.00748			409	0.17425	0.11616	0.00371			409	0.23273	0.19461	0.02028
410	0.23038	0.16583	0.00751			410	0.19166	0.13147	0.00374			410	0.24671	0.21616	0.02024
411	0.25512	0.18666	0.0074			411	0.21965	0.14883	0.00375			411	0.27121	0.23314	0.02031
412	0.28858	0.20802	0.00736			412	0.23668	0.16804	0.00375			412	0.29209	0.24583	0.02029
413	0.31256	0.22994	0.00735			413	0.2713	0.18891	0.00374			413	0.30743	0.2656	0.02026
414	0.34435	0.25239	0.00733			414	0.28774	0.21116	0.00373			414	0.33466	0.28026	0.02
415	0.36231	0.27539	0.00734			415	0.32451	0.23491	0.00372			415	0.35587	0.30509	0.01955
416	0.40417	0.29696	0.00754			416	0.35236	0.2601	0.00371			416	0.38408	0.32742	0.01913
417	0.43179	0.3225	0.00758			417	0.38233	0.28665	0.00371			417	0.41037	0.35074	0.01868
418	0.46503	0.34734	0.00733			418	0.41405	0.3144	0.00371			418	0.43276	0.37452	0.01786
419	0.49194	0.37636	0.00765			419	0.44043	0.34282	0.00374			419	0.45653	0.39182	0.01638
420	0.52653	0.4051	0.00783			420	0.47973	0.3721	0.00378			420	0.48685	0.41392	0.01474
421	0.56232	0.43261	0.00817			421	0.50882	0.40197	0.00383			421	0.5082	0.44055	0.01327
422	0.58804	0.46068	0.00823			422	0.54066	0.43174	0.00388			422	0.53155	0.4625	0.01089
423	0.61711	0.4858	0.00821			423	0.57561	0.46153	0.00394			423	0.55773	0.48684	0.00932
424	0.65736	0.50989	0.00803			424	0.6063	0.49135	0.00396			424	0.5854	0.50939	0.00861
425	0.68224	0.54135	0.00802			425	0.63967	0.52146	0.00401			425	0.60898	0.53128	0.00659
426	0.7068	0.57067	0.00801			426	0.67045	0.55161	0.00401			426	0.63462	0.55174	0.00373
427	0.74059	0.60126	0.00803			427	0.70161	0.58173	0.00402			427	0.66426	0.57597	0.000750055
428	0.76693	0.63102	0.00835			428	0.73869	0.61143	0.00402			428	0.68291	0.60883	0
429	0.79783	0.66332	0.00854			429	0.75898	0.64068	0.00402			429	0.70764	0.6328	0.00199
430	0.8376	0.69102	0.00851			430	0.79007	0.66963	0.00404			430	0.72912	0.65513	0.000627042
431	0.86189	0.71863	0.00865			431	0.82352	0.69806	0.00405			431	0.75879	0.67748	0.000269337
432	0.87092	0.74889	0.0089			432	0.85104	0.72578	0.00409			432	0.77499	0.7024	0.00203
433	0.88833	0.77716	0.00929			433	0.86015	0.75257	0.00407			433	0.80285	0.72409	0.00357
434	0.90152	0.79757	0.00939			434	0.89053	0.77822	0.00403			434	0.81683	0.7491	0.00555
435	0.92727	0.81732	0.00943			435	0.91234	0.80233	0.004			435	0.83665	0.77371	0.01241
436	0.93012	0.83602	0.00956			436	0.92657	0.82524	0.00392			436	0.86155	0.79692	0.01848
437	0.95644	0.86051	0.00969			437	0.94595	0.84711	0.0039			437	0.8722	0.81598	0.02824
438	0.96658	0.87922	0.00949			438	0.95238	0.86747	0.00384			438	0.88837	0.84578	0.04212
439	0.9736	0.89814	0.0099			439	0.97301	0.88662	0.00366			439	0.90163	0.85914	0.05752
440	0.97647	0.91116	0.00958			440	0.97836	0.90523	0.00349			440	0.92772	0.87456	0.07342
441	0.98211	0.92531	0.00943			441	0.98974	0.9228	0.0034			441	0.92996	0.89513	0.09336
442	0.99354	0.93257	0.0094			442	0.9904	0.93863	0.00346			442	0.94144	0.90769	0.11769
443	0.9838	0.93744	0.0085			443	0.99522	0.95247	0.00378			443	0.94737	0.92123	0.14126
444	1	0.95289	0.00784			444	0.98366	0.96502	0.00444			444	0.96428	0.93883	0.17137
445	0.99446	0.96589	0.0085			445	0.99404	0.97564	0.00545			445	0.96407	0.94812	0.19904
446	0.99297	0.96979	0.00805			446	0.9944	0.98463	0.00675			446	0.97387	0.95986	0.22891
447	0.99232	0.98009	0.00777			447	1	0.99102	0.00856			447	0.97949	0.97284	0.26243
448	0.9912	0.98942	0.00816			448	0.99776	0.99531	0.01106			448	0.99191	0.97676	0.29169
449	0.97103	1	0.00928			449	0.98678	0.99768	0.01473			449	0.98908	0.98129	0.32628
450	0.95798	0.99666	0.01091			450	0.97553	0.99856	0.01947			450	0.98697	0.98742	0.36245
451	0.94828	0.9992	0.01304			451	0.97273	0.99751	0.02542			451	0.99233	0.99204	0.3977
452	0.94736	0.9959	0.01562			452	0.96083	0.99436	0.03265			452	1	0.99397	0.4335
453	0.92943	0.98878	0.01806			453	0.9495	0.99015	0.04147			453	0.99095	0.99028	0.47439
454	0.92964	0.98357	0.02676			454	0.94448	0.9852	0.05205			454	0.98521	1	0.51267
455	0.91251	0.97951	0.03502			455	0.93313	0.97948	0.06473			455	0.98567	0.99986	0.55358
456	0.89262	0.97356	0.04512			456	0.91396	0.97276	0.07978			456	0.98526	0.98594	0.59174
457	0.88143	0.9676	0.05729			457	0.89677	0.96512	0.09722			457	0.9748	0.98423	0.63323
458	0.86508	0.95188	0.07179			458	0.88402	0.95647	0.11724			458	0.96918	0.97794	0.67212
459	0.85422	0.94171	0.09234			459	0.86736	0.94668	0.14027			459	0.96817	0.97922	0.71211
460	0.83549	0.9317	0.12278			460	0.85153	0.93635	0.16684			460	0.95016	0.96941	0.74634
461	0.82427	0.92074	0.1505			461	0.82714	0.92478	0.1966			461	0.95078	0.97157	0.77984
462	0.80632	0.90473	0.19285			462	0.81974	0.91277	0.22965			462	0.9465	0.97207	0.81022
463	0.79196	0.89235	0.236			463	0.80267	0.90004	0.26567			463	0.92613	0.95367	0.8365
464	0.76084	0.88131	0.28572			464	0.78604	0.8871	0.3044			464	0.91131	0.94534	0.86472
465	0.74157	0.86394	0.34353			465	0.75872	0.87415	0.34563			465	0.91045	0.93965	0.89248
466	0.7301	0.84535	0.40332			466	0.74285	0.86154	0.38873			466	0.90314	0.93459	0.91371
467	0.7077	0.84253	0.46217			467	0.72944	0.84972	0.43354			467	0.89116	0.91889	0.93134
468	0.69866	0.83103	0.52405			468	0.71581	0.83799	0.47884			468	0.88111	0.9096	0.94739
469	0.6805	0.81387	0.58738			469	0.68913	0.82674	0.52521			469	0.86397	0.89599	0.9641
470	0.66443	0.78868	0.64285			470	0.67465	0.81561	0.57208			470	0.83803	0.88337	0.97729
471	0.64968	0.77833	0.70432			471	0.65807	0.80397	0.6184			471	0.82433	0.87173	0.98493
472	0.62914	0.76451	0.75843			472	0.64813	0.7917	0.66375			472	0.81563	0.8636	0.98969
473	0.61281	0.74954	0.80544			473	0.62686	0.7791	0.70838			473	0.81046	0.84339	0.99768
474	0.59701	0.73811	0.86084			474	0.60615	0.76623	0.75106			474	0.79536	0.83019	1
475	0.58302	0.72285	0.90474			475	0.59153	0.75264	0.79093			475	0.78688	0.81681	0.99822
476	0.57154	0.70772	0.93405			476	0.56582	0.739	0.82752			476	0.76435	0.7945	0.997
477	0.54471	0.69705	0.96284			477	0.55179	0.72505	0.86073			477	0.7467	0.77604	0.99596
478	0.53774	0.68316	0.97526			478	0.54621	0.71178	0.8904			478	0.72654	0.76241	0.99343
479	0.51781	0.6781	0.98845			479	0.51989	0.69851	0.91631			479	0.72121	0.74418	0.98309
480	0.50976	0.66378	0.99788			480	0.50958	0.6851	0.93791			480	0.70594	0.72789	0.97152
481	0.48662	0.64866	0.99577			481	0.49541	0.67131	0.9554			481	0.6864	0.70611	0.96063
482	0.47284	0.6406	1			482	0.47307	0.65678	0.96913			482	0.67721	0.68903	0.94929
483	0.45866	0.62739	0.99068			483	0.45698	0.64199	0.98015			483	0.65973	0.67397	0.93568
484	0.44493	0.61123	0.98408			484	0.4434	0.62704	0.98789			484	0.64144	0.66763	0.92669
485	0.43026	0.59824	0.97237			485	0.42796	0.61124	0.99254			485	0.62656	0.65269	0.91808
486	0.41808	0.5847	0.95738			486	0.41665	0.59483	0.99426			486	0.61484	0.64177	0.90745
487	0.40426	0.57757	0.93691			487	0.40647	0.57769	0.99323			487	0.59879	0.62924	0.89845
488	0.39225	0.55846	0.92407			488	0.39052	0.5601	0.98977			488	0.59427	0.61977	0.88624
489	0.38262	0.54006	0.90858			489	0.38012	0.5423	0.98514			489	0.56796	0.59972	0.87437
490	0.3653	0.52409	0.89373			490	0.36552	0.52502	0.97874			490	0.55533	0.58436	0.86547
491	0.35593	0.50959	0.89459			491	0.35364	0.50793	0.97106			491	0.54884	0.57851	0.85327
492	0.34433	0.49118	0.88485			492	0.34214	0.49199	0.96196			492	0.53143	0.5623	0.83742
493	0.33138	0.47175	0.88044			493	0.32712	0.47673	0.95205			493	0.51762	0.55221	0.82102
494	0.32172	0.45935	0.88502			494	0.32463	0.46257	0.94136			494	0.50522	0.5327	0.80805
495	0.30667	0.44868	0.88123			495	0.30866	0.4494	0.93062			495	0.49281	0.52594	0.79218
496	0.30051	0.43782	0.87375			496	0.29853	0.4372	0.92008			496	0.48458	0.51373	0.7767
497	0.28872	0.42583	0.86618			497	0.28452	0.4259	0.90976			497	0.46767	0.50026	0.76271
498	0.27799	0.41407	0.85527			498	0.27227	0.41504	0.89922			498	0.45342	0.49513	0.74781
499	0.26247	0.40158	0.8541			499	0.26829	0.40449	0.88922			499	0.44073	0.48497	0.738
500	0.25727	0.38764	0.8512			500	0.25829	0.39392	0.87904			500	0.42702	0.4692	0.72527
501	0.25608	0.38082	0.83759			501	0.24804	0.38304	0.86862			501	0.41548	0.45515	0.71168
502	0.24275	0.37356	0.83042			502	0.24102	0.37212	0.8591			502	0.40538	0.44653	0.69833
503	0.23878	0.36284	0.81879			503	0.2259	0.36154	0.85002			503	0.39602	0.43531	0.68461
504	0.22477	0.36029	0.80763			504	0.22245	0.35112	0.84001			504	0.37911	0.4269	0.66798
505	0.21858	0.35945	0.79478			505	0.21468	0.34114	0.82957			505	0.37163	0.41969	0.658
506	0.21279	0.35288	0.7835			506	0.20534	0.33162	0.81807			506	0.36454	0.40702	0.64173
507	0.20177	0.34417	0.76993			507	0.20145	0.32259	0.80626			507	0.35323	0.39316	0.62714
508	0.19584	0.3413	0.7603			508	0.18969	0.31362	0.79418			508	0.34346	0.37873	0.61111
509	0.18795	0.32992	0.74599			509	0.18418	0.30458	0.78181			509	0.33303	0.36412	0.59523
510	0.17982	0.31842	0.74239			510	0.17479	0.29557	0.769			510	0.32617	0.34942	0.57623
511	0.17395	0.30802	0.73754			511	0.16972	0.28645	0.75612			511	0.31336	0.34031	0.55904
512	0.16537	0.2958	0.72371			512	0.16395	0.2773	0.74288			512	0.30038	0.33272	0.54323
513	0.16492	0.28422	0.71461			513	0.16105	0.26858	0.7293			513	0.29337	0.32624	0.52904
514	0.15522	0.2779	0.70422			514	0.14853	0.25991	0.7151			514	0.2846	0.31709	0.51815
515	0.14863	0.26892	0.69801			515	0.14239	0.25094	0.70061			515	0.27916	0.30547	0.50192
516	0.14619	0.25941	0.68543			516	0.14319	0.24246	0.68609			516	0.27083	0.29855	0.48304
517	0.13942	0.24896	0.66598			517	0.1341	0.23428	0.67097			517	0.25711	0.29317	0.46944
518	0.13609	0.23887	0.65451			518	0.1292	0.22627	0.65538			518	0.24615	0.28379	0.45806
519	0.13401	0.22726	0.64173			519	0.1254	0.21863	0.63956			519	0.24348	0.27752	0.44561
520	0.12779	0.21824	0.62369			520	0.12276	0.21131	0.62273			520	0.23369	0.2673	0.43239
521	0.11969	0.20903	0.60335			521	0.11567	0.2042	0.60625			521	0.22893	0.25652	0.41975
522	0.11658	0.20369	0.59054			522	0.10983	0.19736	0.5896			522	0.21959	0.2477	0.41011
523	0.11147	0.20127	0.56885			523	0.10794	0.19078	0.57319			523	0.21219	0.23594	0.40063
524	0.10628	0.20058	0.54863			524	0.10395	0.18451	0.55712			524	0.20835	0.22727	0.38727
525	0.10512	0.19496	0.53114			525	0.09757	0.17851	0.54167			525	0.20014	0.21722	0.37676
526	0.10147	0.18577	0.50983			526	0.09315	0.17274	0.52624			526	0.19422	0.2066	0.36662
527	0.0954	0.1807	0.49041			527	0.09148	0.16725	0.51077			527	0.18484	0.19903	0.35508
528	0.09233	0.17766	0.47557			528	0.08852	0.16198	0.49591			528	0.18632	0.19285	0.34187
529	0.09091	0.1682	0.45958			529	0.08266	0.15654	0.4818			529	0.17474	0.18546	0.32927
530	0.08613	0.164	0.44953			530	0.08102	0.15126	0.46846			530	0.17553	0.1798	0.32177
531	0.08032	0.15808	0.43914			531	0.07791	0.14593	0.45573			531	0.16544	0.17497	0.3112
532	0.07876	0.14908	0.42813			532	0.07482	0.14089	0.44391			532	0.16102	0.16972	0.30308
533	0.07403	0.14495	0.4221			533	0.07094	0.13604	0.43207			533	0.15711	0.16234	0.29562
534	0.07511	0.14079	0.41397			534	0.0683	0.13138	0.42044			534	0.14991	0.15593	0.28988
535	0.06852	0.13379	0.40549			535	0.06566	0.12685	0.40891			535	0.14607	0.15342	0.28055
536	0.07176	0.12863	0.39314			536	0.0677	0.12261	0.3973			536	0.14351	0.15208	0.2713
537	0.0669	0.12239	0.37983			537	0.05997	0.11834	0.38628			537	0.13219	0.14881	0.26198
538	0.06291	0.11523	0.36637			538	0.05806	0.11408	0.37529			538	0.13103	0.14354	0.25321
539	0.06019	0.10945	0.35434			539	0.05541	0.10997	0.36402			539	0.12619	0.14124	0.24634
540	0.06035	0.1032	0.34397			540	0.05307	0.10609	0.35268			540	0.12657	0.13675	0.2378
541	0.05667	0.09941	0.33333			541	0.0523	0.10256	0.3415			541	0.12138	0.13335	0.22532
542	0.053	0.09734	0.32107			542	0.04776	0.09937	0.33051			542	0.11706	0.12695	0.21734
543	0.05317	0.09249	0.30734			543	0.04871	0.09617	0.32029			543	0.11176	0.12218	0.21285
544	0.05192	0.0892	0.29655			544	0.04655	0.09301	0.31086			544	0.10884	0.1193	0.20747
545	0.04983	0.08545	0.28369			545	0.04471	0.08997	0.30198			545	0.10394	0.11593	0.20172
546	0.04701	0.08061	0.27253			546	0.04274	0.0872	0.29365			546	0.10188	0.11036	0.19349
547	0.04549	0.08042	0.26539			547	0.0415	0.08432	0.28507			547	0.09844	0.10862	0.18847
548	0.04311	0.07761	0.2588			548	0.04215	0.08142	0.27675			548	0.09413	0.10533	0.18172
549	0.03979	0.07781	0.25119			549	0.03815	0.0785	0.26858			549	0.09033	0.10148	0.17371
550	0.04055	0.07676	0.24489			550	0.03679	0.07543	0.26069			550	0.08711	0.09879	0.16673
551	0.03974	0.07575	0.24464			551	0.03447	0.07231	0.25306			551	0.08479	0.0959	0.15847
552	0.03721	0.0734	0.23906			552	0.0319	0.06926	0.24529			552	0.08283	0.08765	0.15048
553	0.03451	0.06969	0.23345			553	0.03168	0.06637	0.23727			553	0.08019	0.08502	0.14471
554	0.03475	0.06593	0.22424			554	0.03376	0.06378	0.22973			554	0.07661	0.0785	0.14093
555	0.03168	0.06368	0.21572			555	0.03209	0.06144	0.2218			555	0.07682	0.07529	0.13669
556	0.03201	0.06317	0.21333			556	0.02857	0.05933	0.21399			556	0.07339	0.07091	0.12879
557	0.02942	0.06054	0.20458			557	0.02775	0.0574	0.2069			557	0.06997	0.06611	0.12385
558	0.02976	0.05776	0.19481			558	0.02839	0.05567	0.20023			558	0.06786	0.06424	0.12118
559	0.02661	0.0562	0.18894			559	0.02599	0.05398	0.19363			559	0.06169	0.06053	0.11612
560	0.02981	0.0528	0.18459			560	0.02651	0.05251	0.18712			560	0.06066	0.0576	0.11181
561	0.02648	0.05461	0.17982			561	0.02533	0.05112	0.18086			561	0.06032	0.05535	0.10687
562	0.02591	0.0542	0.17672			562	0.02273	0.04984	0.17507			562	0.05947	0.05424	0.10475
563	0.02541	0.05371	0.17189			563	0.02239	0.04845	0.16932			563	0.0561	0.05173	0.101
564	0.02218	0.05345	0.16347			564	0.02118	0.04711	0.16366			564	0.0545	0.05132	0.09709
565	0.02138	0.05384	0.15589			565	0.02021	0.04578	0.15785			565	0.05285	0.05153	0.09257
566	0.02156	0.05302	0.15225			566	0.01826	0.04443	0.15206			566	0.05024	0.04919	0.08981
567	0.02076	0.05388	0.14786			567	0.01953	0.04302	0.14606			567	0.0491	0.049	0.08787
568	0.02073	0.052	0.14397			568	0.01736	0.04173	0.14009			568	0.04886	0.04837	0.08577
569	0.02109	0.05167	0.13879			569	0.0175	0.0405	0.13392			569	0.04708	0.04933	0.08341
570	0.01988	0.04903	0.12886			570	0.01541	0.03936	0.12816			570	0.04728	0.04827	0.08292
571	0.01786	0.05043	0.12369			571	0.01595	0.03825	0.12263			571	0.045	0.04551	0.07964
572	0.01712	0.04844	0.11694			572	0.01627	0.03718	0.1176			572	0.04179	0.04218	0.07688
573	0.0164	0.04658	0.11143			573	0.01505	0.03596	0.11297			573	0.04146	0.04209	0.07398
574	0.01493	0.04604	0.10573			574	0.01432	0.03487	0.10903			574	0.0396	0.04042	0.07286
575	0.01489	0.04438	0.10283			575	0.01456	0.03362	0.10606			575	0.03837	0.03832	0.07101
576	0.01254	0.04376	0.10253			576	0.01289	0.03235	0.10359			576	0.03438	0.03833	0.06844
577	0.01357	0.03986	0.09796			577	0.01184	0.03097	0.10115			577	0.03522	0.03983	0.06656
578	0.01279	0.03707	0.09538			578	0.01379	0.02958	0.09917			578	0.03552	0.039	0.06488
579	0.01371	0.03503	0.09227			579	0.01283	0.02811	0.09722			579	0.03425	0.03652	0.06434
580	0.01369	0.03512	0.09044			580	0.01227	0.02674	0.09516			580	0.03278	0.03737	0.06318
581	0.01369	0.03655	0.08998			581	0.01176	0.02541	0.09306			581	0.03112	0.03828	0.06147
582	0.01082	0.03599	0.08899			582	0.0102	0.02413	0.091			582	0.03202	0.03839	0.06054
583	0.01401	0.03328	0.08756			583	0.01245	0.02295	0.08862			583	0.02802	0.03721	0.05943
584	0.01212	0.03281	0.08341			584	0.01005	0.02188	0.08597			584	0.03075	0.03569	0.05849
585	0.01111	0.03156	0.0818			585	0.00937	0.02088	0.08303			585	0.02534	0.03445	0.05675
586	0.01153	0.03021	0.07897			586	0.0101	0.01994	0.08019			586	0.02693	0.0327	0.05518
587	0.00969	0.02825	0.08049			587	0.0089	0.01915	0.07739			587	0.02643	0.03229	0.05504
588	0.01026	0.02754	0.07908			588	0.0086	0.01847	0.07442			588	0.02208	0.03137	0.05355
589	0.00886	0.02663	0.07666			589	0.00908	0.0178	0.07144			589	0.02401	0.03007	0.05147
590	0.00946	0.02603	0.0745			590	0.00723	0.01731	0.06834			590	0.02373	0.03062	0.05072
591	0.00965	0.02567	0.07601			591	0.00941	0.01689	0.06536			591	0.02315	0.03154	0.04924
592	0.00763	0.02416	0.07546			592	0.00722	0.01653	0.06256			592	0.0203	0.03244	0.04856
593	0.00708	0.02338	0.07197			593	0.00768	0.01619	0.0598			593	0.02205	0.03192	0.04813
594	0.0081	0.02228	0.06998			594	0.0077	0.01605	0.05732			594	0.02075	0.03116	0.04574
595	0.00672	0.02208	0.0704			595	0.00662	0.0159	0.05532			595	0.02194	0.02972	0.04456
596	0.00865	0.02067	0.07094			596	0.00762	0.01578	0.05371			596	0.01889	0.02923	0.04387
597	0.00877	0.01838	0.06843			597	0.0058	0.01575	0.05214			597	0.01711	0.03076	0.04322
598	0.00647	0.01852	0.06437			598	0.00578	0.01571	0.05082			598	0.01786	0.03114	0.04262
599	0.00594	0.01803	0.06153			599	0.00561	0.01566	0.04959			599	0.01871	0.03165	0.04179
600	0.00511	0.01949	0.057			600	0.00554	0.01563	0.04868			600	0.01646	0.02998	0.04151
601	0.00693	0.01865	0.05299			601	0.00563	0.01559	0.04809			601	0.0156	0.02899	0.04034
602	0.00603	0.01878	0.05183			602	0.00515	0.01537	0.04756			602	0.01714	0.02736	0.04012
603	0.00514	0.01715	0.04836			603	0.00583	0.01512	0.04707			603	0.01433	0.02675	0.03949
604	0.00472	0.0192	0.04363			604	0.00467	0.0147	0.04674			604	0.01591	0.02514	0.03876
605	0.00544	0.01848	0.03931			605	0.00603	0.0141	0.0465			605	0.01458	0.02236	0.03862
606	0.00612	0.01866	0.03721			606	0.00418	0.01344	0.04627			606	0.01385	0.02087	0.03757
607	0.00542	0.01747	0.037			607	0.00423	0.01263	0.04586			607	0.01336	0.02049	0.0372
608	0.00346	0.01847	0.03574			608	0.00302	0.01193	0.04553			608	0.01304	0.02097	0.03763
609	0.00404	0.01792	0.03535			609	0.00514	0.01136	0.04497			609	0.01391	0.02011	0.03685
610	0.0045	0.0174	0.03431			610	0.00509	0.01082	0.04438			610	0.01201	0.01856	0.0364
611	0.00481	0.01628	0.03184			611	0.00352	0.01019	0.04338			611	0.01095	0.01757	0.03578
612	0.00422	0.01521	0.0301			612	0.00391	0.00966	0.04207			612	0.01242	0.01589	0.03589
613	0.00404	0.01373	0.03031			613	0.00356	0.00927	0.04024			613	0.01128	0.01546	0.03463
614	0.00413	0.01305	0.03342			614	0.00325	0.00897	0.03835			614	0.01138	0.0148	0.03442
615	0.00319	0.01274	0.03268			615	0.00298	0.00877	0.0363			615	0.01093	0.01467	0.03403
616	0.00424	0.01207	0.03222			616	0.00311	0.00862	0.03396			616	0.01032	0.01444	0.03348
617	0.00349	0.01141	0.02928			617	0.00309	0.00861	0.03157			617	0.00971	0.01364	0.03292
618	0.00296	0.01123	0.0277			618	0.00267	0.00864	0.02911			618	0.00889	0.01309	0.03318
619	0.00324	0.0103	0.02733			619	0.00333	0.00863	0.0266			619	0.0105	0.01378	0.03338
620	0.00317	0.01041	0.02715			620	0.00213	0.00867	0.02454			620	0.00988	0.01281	0.03332
621	0.00273	0.00968	0.02763			621	0.00272	0.00873	0.02268			621	0.0077	0.01348	0.03285
622	0.00289	0.00979	0.02809			622	0.00252	0.00896	0.02114			622	0.00899	0.01367	0.03255
623	0.00256	0.0085	0.02544			623	0.0023	0.00917	0.01993			623	0.00805	0.01346	0.03227
624	0.00221	0.00942	0.02561			624	0.00175	0.00938	0.01909			624	0.00835	0.01439	0.03241
625	0.00292	0.00863	0.02597			625	0.00246	0.00953	0.01847			625	0.00896	0.01408	0.03148
626	0.00257	0.00796	0.0248			626	0.0025	0.00984	0.01798			626	0.00808	0.01449	0.03135
627	0.00191	0.00833	0.02347			627	0.00227	0.01008	0.01744			627	0.00753	0.01414	0.03136
628	0.00195	0.00912	0.02381			628	0.00222	0.01019	0.01731			628	0.00815	0.01453	0.03148
629	0.00156	0.0092	0.02311			629	0.00233	0.0103	0.01727			629	0.00754	0.01416	0.03163
630	0.00159	0.00989	0.02527			630	0.00182	0.01038	0.01728			630	0.00592	0.0151	0.03113
631	0.00264	0.00976	0.02588			631	0.00213	0.01044	0.01738			631	0.00565	0.01425	0.03055
632	0.0027	0.01029	0.0278			632	0.0014	0.01051	0.01735			632	0.00623	0.01399	0.03015
633	0.00213	0.01052	0.02819			633	0.00123	0.01052	0.01736			633	0.0058	0.01438	0.02972
634	0.002	0.01244	0.02692			634	0.00193	0.01045	0.01764			634	0.00532	0.01509	0.02927
635	0.00172	0.01124	0.02609			635	0.00207	0.01041	0.01791			635	0.00485	0.01494	0.02831
636	0.00159	0.01223	0.02631			636	0.00189	0.01036	0.0182			636	0.00555	0.01516	0.02725
637	0.00162	0.01461	0.02473			637	0.0016	0.01032	0.01835			637	0.00575	0.01442	0.02703
638	0.00132	0.01645	0.02318			638	0.00215	0.01047	0.0184			638	0.00641	0.01363	0.02634
639	0.000673759	0.0171	0.02195			639	0.00101	0.01045	0.01834			639	0.00442	0.01211	0.02588
640	0.00258	0.0182	0.02275			640	0.000914474	0.01022	0.01817			640	0.00508	0.01353	0.02627
641	0.000874515	0.01947	0.01755			641	0.00104	0.00982	0.01785			641	0.00628	0.01438	0.02599
642	0.00142	0.01971	0.01793			642	0.00106	0.00937	0.01766			642	0.00525	0.01507	0.02596
643	0.00199	0.0194	0.01756			643	0.0013	0.0088	0.01727			643	0.00461	0.0157	0.02546
644	0.00259	0.01933	0.01972			644	0.00132	0.00818	0.01682			644	0.00456	0.01454	0.02495
645	0.0015	0.0168	0.01926			645	0.0011	0.00749	0.01614			645	0.00389	0.0155	0.02617
646	0.000961267	0.01604	0.01738			646	0.000869406	0.00685	0.01548			646	0.00445	0.01644	0.02623
647	0.000780974	0.01699	0.01555			647	0.00101	0.00631	0.01489			647	0.00351	0.01734	0.02443
648	0.000597422	0.01634	0.01586			648	0.00076746	0.0058	0.01428			648	0.00343	0.0166	0.02417
649	0.00162	0.01596	0.01695			649	0.000777617	0.00529	0.01354			649	0.00351	0.01859	0.02384
650	0.00165	0.01541	0.01877			650	0.00132	0.00499	0.01289			650	0.00301	0.01797	0.02409
651	0.00105	0.01381	0.0187			651	0.00147	0.00489	0.01188			651	0.00416	0.01845	0.02374
652	0.00195	0.01258	0.01528			652	0.0015	0.00489	0.01093			652	0.00396	0.01763	0.02366
653	0.00131	0.01121	0.01628			653	0.000818822	0.00479	0.01009			653	0.00245	0.01794	0.0225
654	0.000223762	0.01068	0.01826			654	0.00112	0.00475	0.00931			654	0.00395	0.01799	0.02097
655	0.000458747	0.00865	0.02086			655	0.00143	0.0048	0.00855			655	0.00314	0.01926	0.02129
656	0.00186	0.01012	0.02135			656	0.000558182	0.00488	0.00797			656	0.00288	0.01916	0.02126
657	0.000477877	0.01089	0.02103			657	0.000715654	0.00483	0.00753			657	0.0034	0.01741	0.02159
658	0.000242638	0.0103	0.01991			658	0.00212	0.00481	0.00732			658	0.00427	0.01726	0.02212
659	0.000496921	0.00955	0.01912			659	0.000895628	0.00492	0.00717			659	0.0019	0.01766	0.02229
660	0.00254	0.00966	0.018			660	0.000259749	0.00505	0.0072			660	0.00344	0.01798	0.02214
661	0.000780448	0.00901	0.01658			661	0.000753821	0.0052	0.00732			661	0.00282	0.01745	0.02237
662	0.000264847	0.00709	0.01968			662	0.00145	0.00526	0.00747			662	0.00304	0.01751	0.02252
663	0.00108	0.00565	0.01866			663	0.000605105	0.00524	0.00762			663	0.00221	0.01671	0.0226
664	0.000834437	0.00584	0.01718			664	0.000613718	0.00525	0.00787			664	0.00336	0.01658	0.02377
665	0.00114	0.00455	0.01522			665	0.000623443	0.00524	0.00791			665	0.0025	0.01553	0.02391
666	0.000294821	0.0072	0.01281			666	0.00101	0.00517	0.00806			666	0.00197	0.0126	0.02398
667	0.000598846	0.00935	0.00993			667	0.000259749	0.00509	0.00813			667	0.00261	0.01355	0.02439
668	0.00124	0.01056	0.00521			668	0.000655359	0.00509	0.00795			668	0.00451	0.01359	0.02526
669	0.000638002	0.01157	0.00616			669	0.00128	0.00486	0.00766			669	0.0017	0.01338	0.0252
670	0	0.01237	0.00709			670	0.000681578	0.00458	0.0073			670	0.00108	0.01388	0.02544
671	0.000340746	0.01296	0.00665			671	0.00179	0.00432	0.00704			671	0.0036	0.01341	0.02551
672	0.000363378	0.01335	0.00448			672	0.000723321	0.00411	0.0066			672	0.00257	0.01369	0.02583
673	0.00116	0.01352	0.00957			673	0.000505323	0.00401	0.00615			673	0.00298	0.01299	0.02651
674	0.000402306	0.0124	0.01219			674	2.89063e-06	0.00387	0.00576			674	0.00122	0.01474	0.02679
675	0.00121	0.01277	0.01356			675	0	0.00382	0.00549			675	0.00256	0.01476	0.027
676	0.000401777	0.0118	0.01462			676	0.000259749	0.00378	0.00549			676	0.00201	0.01358	0.02762
677	0	0.01223	0.01537			677	0.000760585	0.00382	0.00564			677	0.00121	0.01351	0.0278
678	0.000771725	0.01031	0.01581			678	1.35976e-05	0.00387	0.00588			678	0.000941027	0.01322	0.02793
679	0	0.0112	0.0149			679	1.74072e-05	0.00398	0.00619			679	0.00168	0.01499	0.028
680	0.000374174	0.01164	0.0153			680	0.000975942	0.00417	0.00661			680	0.000925911	0.01485	0.02801
681	0	0.01162	0.01422			681	0.000259749	0.0044	0.007			681	0.00188	0.01353	0.02797
682	0.00144	0.01115	0.01237			682	0.00118	0.00458	0.00748			682	0.00185	0.01226	0.02787
683	0.000706561	0.01208	0.01341			683	0.000934743	0.00472	0.00807			683	0.000898264	0.01335	0.02772
684	0.0003453	0.01337	0.01389			684	0.000480003	0.00498	0.00862			684	0.00157	0.01336	0.02692
685	0.000339271	0.01317	0.01273			685	0.000693077	0.00523	0.00921			685	0.00221	0.01349	0.02678
686	0.000667269	0.01365	0.01269			686	4.76761e-05	0.00521	0.0093			686	0.00241	0.01376	0.0246
687	0	0.01233	0.01201			687	0.000259749	0.00515	0.00937			687	0.0013	0.01521	0.02535
688	0	0.01261	0.01072			688	0.000466285	0.00506	0.00942			688	0.00213	0.01542	0.02553
689	0.0016	0.01398	0.01535			689	0.000463431	0.00494	0.00944			689	0.00233	0.01544	0.02564
690	0	0.01488	0.01554			690	0.000663186	0.00479	0.00944			690	0.00147	0.01527	0.02498
691	0.000313827	0.01531	0.01534			691	0.00106	0.0046	0.00942			691	0.00126	0.01491	0.02509
692	0.000933476	0.01528	0.01475			692	0.000656219	0.00438	0.00938			692	0.000840826	0.01624	0.02512
693	0.0006149	0.01478	0.01576			693	0.000456793	0.00413	0.00932			693	0.000840782	0.01494	0.02506
694	0.00061695	0.01381	0.01523			694	0.000455302	0.00384	0.00923			694	0.00164	0.01485	0.02493
695	0.000920054	0.01416	0.01438			695	0.000845724	0.00352	0.00913			695	0.00245	0.01458	0.02472
696	0.000304811	0.013	0.01213			696	0.000259749	0.00317	0.009			696	0.00204	0.01413	0.02443
697	0.000305191	0.01319	0.01126			697	0.000259749	0.00278	0.00885			697	0.00144	0.01349	0.02406
698	0.000304762	0.01196	0.01			698	0.000454051	0.00236	0.00868			698	0.00124	0.01267	0.02522
699	0.00030491	0.01365	0.00723			699	0.000455068	0.00191	0.00849			699	0.00184	0.01166	0.02499
700	0	0.0131	0.00643			700	0.000454859	0.00143	0.00827			700	0.00144	0.01047	0.02469
701	0	0.01232	0.00594										0.00083728	0.01374	0.02432
702	0	0.01133	0.00682										0.00124	0.0134	0.02389
703	0.0006228	0.01012	0.00964										0.00166	0.01295	0.02339
704	0.000314218	0.00869	0.00887										0.00063889	0.01238	0.02372
705	0	0.00703	0.00969										0.000433244	0.01169	0.02425
706	0	0.00516	0.01192										0.00148	0.01088	0.02424
707	0	0.00463	0.01282										0.000855699	0.00867	0.02418
708	0.000649906	0.00594	0.01344										0.00107	0.00948	0.02493
709	0	0.0069	0.01251										0.00086181	0.00907	0.02492
710	0.000330234	0.0069	0.01332										0.000215567	0.00854	0.02485
711	0	0.0069	0.01244										0.0011	0.00922	0.02552
712	0.000340575	0.0069	0.01331										0.000657293	0.0088	0.02349
713	0.000690514	0.00564	0.01376										0.000661272	0.00827	0.02385
714	0.000347271	0.00634	0.01378										0.000662298	0.00764	0.02414
715	0	0.00696	0.01197										0.00113	0.00543	0.02438
716	0.000721619	0.00617	0.01195										0.00209	0.00495	0.02454
717	0.00073395	0.00603	0.0117										0.000674587	0.00506	0.02465
718	0	0.00786	0.0107										0.00116	0.0061	0.0247
719	0.000379357	0.00945	0.01154										0.000681851	0.007	0.02356
720	0	0.01082	0.01362										0.00144	0.00749	0.02439
721	0.00038811	0.01195	0.01582										0.00068941	0.00895	0.02343
722	0.000394325	0.01285	0.01475										0.000693652	0.01025	0.0245
723	0	0.01352	0.01579										0.00069901	0.0114	0.02494
724	0.000819525	0.01396	0.01624										0.000433244	0.01238	0.0253
725	0.000417119	0.01416	0.01804										0.000707671	0.0132	0.0256
726	0.000424903	0.01414	0.01814										0.000153552	0.01204	0.0257
727	0	0.01388	0.01773										0.000433244	0.0131	0.0258
728	0.000440463	0.01339	0.01681										0.000433244	0.01537	0.02591
729	0.00090247	0.01267	0.01538										0.000728417	0.01641	0.02601
730	0	0.01172	0.01552										0.000433244	0.01728	0.02612
731	0	0.01054	0.0121										0.000433244	0.01797	0.02623
732	0.00143	0.00913	0.01327										0.000433244	0.01849	0.02633
733	0.000484689	0.00749	0.01264										0.00107	0.01883	0.02644
734	0	0.00763	0.01155										0.000756771	0.01899	0.02655
735	0.0015	0.00637	0.00999										0.000433244	0.01898	0.02666
736	0.00051211	0.00495	0.01027										0.000433244	0.01658	0.02677
737	0.000522445	0.00554	0.00654										8.90551e-05	0.01691	0.02687
738	0	0.0069	0.00824										0.00113	0.01702	0.02698
739	0.000541684	0.00484	0.01049										0.000789296	0.01692	0.02709
740	0	0.00598	0.00862										0.000433244	0.0166	0.02721
741	0.000562671	0.007	0.00995										6.14848e-05	0.01606	0.02732
742	0.00115	0.0079	0.01081										5.49023e-05	0.017	0.02743
743	0.000582052	0.00868	0.01388										4.78047e-05	0.01398	0.02754
744	0	0.00934	0.01493										0.000825933	0.01404	0.02765
745	0	0.00988	0.0156										0.00124	0.01386	0.02777
746	0	0.0103	0.01591										0.000433244	0.01344	0.02788
747	0.000633408	0.0106	0.01325										1.69014e-05	0.01277	0.02799
748	0	0.01078	0.01426										9.55229e-06	0.000425999	0.02811
749	0	0.01084	0.01474										0	0	0.02822
750	0	0.00827	0.01471										0.000433244	0.00484	0.02834
			0											0.00964
			0.00976											0.01471
			0.01644											0.01772
			0.02187											0.02031
			0.02306											0.02463
			0.02768											0.0238
			0.03089											0.02669
			0.03624											0.02913
			0.03809											0.03111
			0.03522											0.02602
			0.04008											0.03158
			0.0413											0.03478
			0.04117											0.03744
			0.03969											0.03955
			0.03685											0.04112
			0.02878											0.04214
			0.02538											0.03854
			0.02458											0.03975
			0.01975											0.04033
			0.0135											0.04029
			0.00581											0.04258
			0.01953											0.04207
			0.0185											0.04098
			0.01687											0.03931
			0.01464											0.03706
			0.01665											0.03423
			0.01523											0.03082
			0.00871											0.03016
			0.00904											0.02134
			0.00866											0.01872
			0.01313											0.01546
			0.01367											0.01157
			0.0137											0.0223
			0.01324											0.02193
			0.01227											0.02156
			0.01081											0.0212
			0.00966											0.02085
			0.01281											0.0205
			0.01537											0.02015
			0.01734											0.01981
			0.01793											0.01947
			0.01839											0.01913
			0.01871											0.0188
			0.0189											0.01848
			0.01895											0.01816
			0.01886											0.01784
			0.01863											0.01753
			0.01827											0.01722
			0.01777											0.01692
			0.01713											0.01662

## Sheet: Fig. 2b
				FL Exc. 298K			FL Exc. 77K			Phos Exc. 298K			Phos Exc. 77K
wavelength	Abs 298K		wavelength	Intensity		wavelength	Intensity		wavelength	Intensity		wavelength	Intensity
800	0		300	0.5883		300	0.52464		300	0.7521		300	0.90039
799	0.00139		301	0.57799		301	0.51225		301	0.73471		301	0.86771
798	0.0027		302	0.56822		302	0.50055		302	0.71817		302	0.83656
797	0.00394		303	0.55901		303	0.48954		303	0.70248		303	0.80694
796	0.00511		304	0.55034		304	0.47921		304	0.68763		304	0.77884
795	0.0062		305	0.54222		305	0.46957		305	0.67363		305	0.75227
794	0.00722		306	0.53464		306	0.46062		306	0.66048		306	0.72723
793	0.00816		307	0.52762		307	0.45236		307	0.64818		307	0.70372
792	0.00903		308	0.52114		308	0.44478		308	0.63673		308	0.68173
791	0.00983		309	0.51521		309	0.4379		309	0.62612		309	0.66127
790	0.01055		310	0.50983		310	0.4317		310	0.61636		310	0.64234
789	0.0112		311	0.50499		311	0.42619		311	0.60745		311	0.62493
788	0.01178		312	0.5007		312	0.42136		312	0.59939		312	0.60905
787	0.01228		313	0.49696		313	0.41723		313	0.59217		313	0.5947
786	0.0127		314	0.49377		314	0.41378		314	0.58581		314	0.58188
785	0.01306		315	0.49112		315	0.41102		315	0.58029		315	0.57058
784	0.01309		316	0.49135		316	0.40977		316	0.57539		316	0.56949
783	0.01501		317	0.49204		317	0.40947		317	0.57785		317	0.56674
782	0.01476		318	0.49387		318	0.41007		318	0.58047		318	0.56179
781	0.01316		319	0.4952		319	0.41023		319	0.58185		319	0.55903
780	0.01234		320	0.49636		320	0.4119		320	0.57949		320	0.55179
779	0.01296		321	0.49837		321	0.41533		321	0.57686		321	0.55601
778	0.01207		322	0.49947		322	0.41898		322	0.5731		322	0.55181
777	0.01104		323	0.50075		323	0.42386		323	0.57596		323	0.54341
776	0.01103		324	0.50145		324	0.42908		324	0.57815		324	0.5427
775	0.01107		325	0.50026		325	0.43372		325	0.57973		325	0.53462
774	0.01199		326	0.4989		326	0.43805		326	0.57218		326	0.53833
773	0.01188		327	0.49582		327	0.44111		327	0.57159		327	0.54439
772	0.01166		328	0.49165		328	0.44239		328	0.56635		328	0.5453
771	0.01274		329	0.4857		329	0.44278		329	0.5656		329	0.54597
770	0.01379		330	0.47786		330	0.44043		330	0.555		330	0.54108
769	0.01423		331	0.46779		331	0.43668		331	0.54874		331	0.54121
768	0.01347		332	0.45701		332	0.43079		332	0.53645		332	0.54066
767	0.01426		333	0.44414		333	0.42261		333	0.52395		333	0.53784
766	0.01368		334	0.43042		334	0.41282		334	0.50696		334	0.53755
765	0.01345		335	0.41656		335	0.40218		335	0.49809		335	0.53741
764	0.01417		336	0.40208		336	0.38925		336	0.47973		336	0.53338
763	0.01595		337	0.38753		337	0.37561		337	0.46168		337	0.52262
762	0.01795		338	0.3723		338	0.3597		338	0.44335		338	0.5082
761	0.01888		339	0.35798		339	0.34368		339	0.43015		339	0.49954
760	0.01949		340	0.34511		340	0.32711		340	0.41372		340	0.48945
759	0.01903		341	0.33343		341	0.30995		341	0.39795		341	0.47152
758	0.01872		342	0.3228		342	0.29337		342	0.39034		342	0.45676
757	0.01926		343	0.31458		343	0.27845		343	0.37819		343	0.44257
756	0.02003		344	0.30902		344	0.26393		344	0.37169		344	0.42941
755	0.02025		345	0.30527		345	0.25205		345	0.3681		345	0.41865
754	0.02063		346	0.30433		346	0.24113		346	0.36533		346	0.40805
753	0.0206		347	0.30537		347	0.23235		347	0.36734		347	0.39266
752	0.02027		348	0.30945		348	0.22703		348	0.36814		348	0.3769
751	0.02075		349	0.31474		349	0.2241		349	0.3767		349	0.35761
750	0.02208		350	0.32349		350	0.22423		350	0.38815		350	0.33878
749	0.02197		351	0.33585		351	0.22774		351	0.40616		351	0.33087
748	0.02112		352	0.34972		352	0.23401		352	0.42308		352	0.32698
747	0.02021		353	0.36602		353	0.24333		353	0.44262		353	0.32472
746	0.0209		354	0.38393		354	0.25441		354	0.46285		354	0.33384
745	0.02227		355	0.40335		355	0.26825		355	0.48363		355	0.34603
744	0.02294		356	0.4247		356	0.2841		356	0.50689		356	0.36831
743	0.02299		357	0.44745		357	0.30235		357	0.53541		357	0.38791
742	0.02306		358	0.47153		358	0.32188		358	0.56147		358	0.40794
741	0.02324		359	0.49646		359	0.34274		359	0.58692		359	0.42758
740	0.02405		360	0.52278		360	0.36425		360	0.61302		360	0.4579
739	0.02397		361	0.54934		361	0.38648		361	0.63891		361	0.48571
738	0.02362		362	0.57632		362	0.41033		362	0.66367		362	0.51395
737	0.02418		363	0.60403		363	0.43443		363	0.68905		363	0.542
736	0.02442		364	0.63181		364	0.45964		364	0.71118		364	0.56929
735	0.02557		365	0.65924		365	0.48524		365	0.73618		365	0.60046
734	0.02679		366	0.6869		366	0.5113		366	0.75936		366	0.62817
733	0.02655		367	0.71431		367	0.53775		367	0.78277		367	0.66183
732	0.02645		368	0.74172		368	0.56428		368	0.80274		368	0.69653
731	0.02603		369	0.76913		369	0.5913		369	0.82417		369	0.72667
730	0.02555		370	0.79575		370	0.61834		370	0.84478		370	0.75419
729	0.0264		371	0.82151		371	0.64538		371	0.86407		371	0.78561
728	0.0257		372	0.84588		372	0.6725		372	0.88369		372	0.81519
727	0.02552		373	0.86908		373	0.70065		373	0.9018		373	0.83953
726	0.02542		374	0.8909		374	0.72802		374	0.91592		374	0.85903
725	0.02562		375	0.91028		375	0.75439		375	0.93346		375	0.87646
724	0.02638		376	0.92898		376	0.77967		376	0.94568		376	0.90261
723	0.02673		377	0.94545		377	0.80502		377	0.9582		377	0.91641
722	0.02739		378	0.96034		378	0.82958		378	0.97029		378	0.92813
721	0.02769		379	0.97294		379	0.85238		379	0.98258		379	0.94223
720	0.02682		380	0.9836		380	0.87451		380	0.99471		380	0.94911
719	0.02554		381	0.99211		381	0.89561		381	0.99925		381	0.96505
718	0.02543		382	0.99715		382	0.91559		382	1		382	0.9741
717	0.02583		383	0.9999		383	0.93277		383	0.99948		383	0.97751
716	0.02639		384	1		384	0.94859		384	0.99614		384	0.98847
715	0.02638		385	0.99793		385	0.96259		385	0.99055		385	0.99185
714	0.02607		386	0.99306		386	0.97412		386	0.98152		386	0.99961
713	0.02616		387	0.98585		387	0.98485		387	0.9684		387	1
712	0.02711		388	0.97551		388	0.99255		388	0.9511		388	0.99811
711	0.02746		389	0.96314		389	0.99753		389	0.92834		389	0.99507
710	0.02841		390	0.94863		390	1		390	0.90665		390	0.99265
709	0.02897		391	0.93023		391	0.99963		391	0.87532		391	0.97492
708	0.0294		392	0.90995		392	0.99708		392	0.84394		392	0.95629
707	0.03044		393	0.8871		393	0.99099		393	0.81007		393	0.93591
706	0.03144		394	0.86178		394	0.98248		394	0.77759		394	0.91245
705	0.03132		395	0.83539		395	0.97085		395	0.7459		395	0.89058
704	0.0305		396	0.80746		396	0.95672		396	0.71144		396	0.86709
703	0.03007		397	0.7776		397	0.93879		397	0.67388		397	0.83945
702	0.03103		398	0.74653		398	0.91805		398	0.63479		398	0.80487
701	0.03133		399	0.71416		399	0.89538		399	0.60093		399	0.76585
700	0.03173		400	0.68089		400	0.86965		400	0.56278		400	0.73011
699	0.03235		401	0.64686		401	0.84159		401	0.52287		401	0.69576
698	0.03201		402	0.61225		402	0.81132		402	0.48325		402	0.65603
697	0.033		403	0.57754		403	0.77971		403	0.44599		403	0.61003
696	0.03444		404	0.54275		404	0.74514		404	0.41018		404	0.56886
695	0.03503		405	0.50788		405	0.70875		405	0.37764		405	0.52897
694	0.03467		406	0.47398		406	0.67136		406	0.3416		406	0.49288
693	0.03363		407	0.44031		407	0.6335		407	0.31134		407	0.44651
692	0.03268		408	0.40737		408	0.59408		408	0.28291		408	0.40215
691	0.03252		409	0.37528		409	0.55425		409	0.25393		409	0.36028
690	0.0327		410	0.34398		410	0.51498		410	0.22904		410	0.31633
689	0.03336		411	0.3144		411	0.47581		411	0.20399		411	0.28227
688	0.03367		412	0.28625		412	0.43653		412	0.1825		412	0.24625
687	0.03311		413	0.2596		413	0.39761		413	0.16329		413	0.21439
686	0.03277		414	0.23455		414	0.36054		414	0.14164		414	0.18998
685	0.03267		415	0.21106		415	0.32499		415	0.12426		415	0.16478
684	0.03315		416	0.18892		416	0.29117		416	0.10867		416	0.14483
683	0.03322		417	0.16831		417	0.25961		417	0.09426		417	0.12441
682	0.03336		418	0.14925		418	0.22936		418	0.08042		418	0.10532
681	0.03336		419	0.13211		419	0.20085		419	0.0684		419	0.09158
680	0.0331		420	0.11648		420	0.17462		420	0.05755		420	0.07637
679	0.03318		421	0.10157		421	0.15052		421	0.04876		421	0.0612
678	0.03318		422	0.08845		422	0.12899		422	0.04264		422	0.05027
677	0.03329		423	0.07647		423	0.10981		423	0.03648		423	0.04188
676	0.03343		424	0.06571		424	0.09236		424	0.03279		424	0.03253
675	0.03367		425	0.05633		425	0.07716		425	0.02918		425	0.02629
674	0.03392		426	0.04627		426	0.06201		426	0.02342		426	0.02124
673	0.03439		427	0.03719		427	0.04852		427	0.0183		427	0.01544
672	0.03459		428	0.0291		428	0.03668		428	0.0138		428	0.0124
671	0.03436		429	0.022		429	0.02649		429	0.00994		429	0.01099
670	0.03442		430	0.01589		430	0.01795		430	0.0067		430	0.01013
669	0.03417		431	0.01076		431	0.01106		431	0.0041		431	0.00852
668	0.03396		432	0.00663		432	0.00582		432	0.00213		432	0.00762
667	0.03395		433	0.00349		433	0.00223		433	0.000789592		433	0.0055
666	0.03339		434	0.00134		434	0.000288027		434	7.93969e-05		434	0.00538
665	0.03263		435	0.00017372		435	0		435	0		435	0.00315
664	0.03233		436	0		436	0.00136		436	0.000551402		436	0.00253
663	0.03178		437	0.000815801		437	0.00438		437	0.00173		437	0.00215
662	0.03173		438	0.00262		438	0.00904		438	0.00355		438	0.00193
661	0.03278		439	0.00542		439	0.01535		439	0.00599		439	0.00175
660	0.03345		440	0.0092		440	0.02332		440	0.00906		440	0.000941672
659	0.03323											441	0.000500634
658	0.03278											442	0
657	0.03226											443	0.000237177
656	0.03225											444	0.000786532
655	0.03249											445	0.000821975
654	0.03233											446	0.000826919
653	0.0317											447	0.000859902
652	0.03149											448	0.000805176
651	0.03105											449	0.000891656
650	0.03059											450	0.000683475
649	0.03048											451	0.000911336
648	0.0304											452	0.00102
647	0.03012											453	0.000903631
646	0.02981											454	0.000882097
645	0.02947											455	0.000844989
644	0.02914											456	0.000874455
643	0.02852											457	0.000830362
642	0.02771											458	0.000764223
641	0.02743											459	0.000828797
640	0.0271											460	0.000905648
639	0.02637											461	0.000909999
638	0.02639											462	0.000915512
637	0.02612											463	0.000922188
636	0.02587											464	0.000930027
635	0.02566											465	0.000939027
634	0.02498											466	0.00094919
633	0.02431											467	0.000960516
632	0.02477											468	0.000973003
631	0.02545											469	0.000986654
630	0.02549											470	0.001
629	0.02529											471	0.00102
628	0.02491											472	0.00103
627	0.02437											473	0.00105
626	0.02421											474	0.00107
625	0.02363											475	0.00109
624	0.02322
623	0.02283
622	0.02243
621	0.02179
620	0.02148
619	0.02096
618	0.02074
617	0.02013
616	0.01943
615	0.01856
614	0.0183
613	0.01786
612	0.0177
611	0.01805
610	0.01806
609	0.01775
608	0.01779
607	0.01718
606	0.01741
605	0.01738
604	0.01703
603	0.01719
602	0.01784
601	0.01761
600	0.01696
599	0.01638
598	0.01594
597	0.01545
596	0.01513
595	0.01514
594	0.01491
593	0.01424
592	0.01319
591	0.01275
590	0.01259
589	0.0119
588	0.01162
587	0.01109
586	0.0106
585	0.01035
584	0.01058
583	0.01027
582	0.01069
581	0.01063
580	0.01031
579	0.01028
578	0.01002
577	0.00982
576	0.00998
575	0.00985
574	0.00978
573	0.01004
572	0.01036
571	0.01
570	0.00939
569	0.00989
568	0.01039
567	0.01031
566	0.01015
565	0.01027
564	0.00947
563	0.00897
562	0.00846
561	0.00884
560	0.00898
559	0.00895
558	0.00901
557	0.00942
556	0.0094
555	0.00996
554	0.01048
553	0.01036
552	0.011
551	0.01088
550	0.01167
549	0.01217
548	0.01215
547	0.01233
546	0.01255
545	0.01347
544	0.01439
543	0.01495
542	0.01485
541	0.01463
540	0.01458
539	0.01536
538	0.01471
537	0.01473
536	0.01456
535	0.01473
534	0.01438
533	0.01465
532	0.01497
531	0.01489
530	0.01459
529	0.0145
528	0.01445
527	0.01521
526	0.01548
525	0.01584
524	0.01595
523	0.01635
522	0.01685
521	0.01768
520	0.01821
519	0.01837
518	0.01856
517	0.01882
516	0.01889
515	0.01871
514	0.01867
513	0.0181
512	0.01754
511	0.01764
510	0.01807
509	0.01849
508	0.01854
507	0.01876
506	0.01824
505	0.01845
504	0.0184
503	0.01889
502	0.01894
501	0.0183
500	0.01867
499	0.01956
498	0.02052
497	0.02163
496	0.02251
495	0.02316
494	0.02411
493	0.02532
492	0.02579
491	0.02694
490	0.02727
489	0.02809
488	0.02837
487	0.02869
486	0.02858
485	0.0288
484	0.02947
483	0.0297
482	0.02916
481	0.02914
480	0.02936
479	0.02924
478	0.02913
477	0.02853
476	0.02864
475	0.02879
474	0.02914
473	0.02964
472	0.02949
471	0.02923
470	0.02977
469	0.03048
468	0.0311
467	0.03088
466	0.03078
465	0.03086
464	0.03088
463	0.03085
462	0.03009
461	0.0293
460	0.02878
459	0.02877
458	0.02841
457	0.02821
456	0.02735
455	0.02669
454	0.0266
453	0.026
452	0.025
451	0.0258
450	0.02658
449	0.02718
448	0.02771
447	0.0281
446	0.02882
445	0.02969
444	0.03121
443	0.03238
442	0.03365
441	0.03541
440	0.03696
439	0.03833
438	0.03927
437	0.04075
436	0.04312
435	0.0452
434	0.04748
433	0.04957
432	0.05165
431	0.05453
430	0.05958
429	0.06558
428	0.07172
427	0.07847
426	0.08531
425	0.09337
424	0.10273
423	0.1122
422	0.12333
421	0.13648
420	0.14941
419	0.16283
418	0.17832
417	0.19561
416	0.214
415	0.23462
414	0.25649
413	0.27911
412	0.30302
411	0.32771
410	0.35393
409	0.38216
408	0.41197
407	0.44418
406	0.47591
405	0.50826
404	0.54292
403	0.57754
402	0.61325
401	0.64819
400	0.68349
399	0.71799
398	0.75087
397	0.78268
396	0.81339
395	0.84217
394	0.86906
393	0.89511
392	0.91934
391	0.94077
390	0.95812
389	0.97305
388	0.98512
387	0.99276
386	0.99771
385	1
384	0.99846
383	0.99432
382	0.98756
381	0.97858
380	0.96901
379	0.95832
378	0.94545
377	0.92891
376	0.90985
375	0.88976
374	0.86968
373	0.84792
372	0.8243
371	0.79955
370	0.77241
369	0.7471
368	0.72002
367	0.6945
366	0.66866
365	0.64404
364	0.61955
363	0.59603
362	0.57048
361	0.54472
360	0.52111
359	0.49757
358	0.47545
357	0.45287
356	0.43411
355	0.41494
354	0.39861
353	0.38216
352	0.36785
351	0.35626
350	0.34637
349	0.33671
348	0.33078
347	0.32525
346	0.32339
345	0.32464
344	0.32327
343	0.32975
342	0.33436
341	0.34036
340	0.34743
339	0.3592
338	0.3729
337	0.38709
336	0.40152
335	0.41457
334	0.43073
333	0.4454
332	0.45931
331	0.47296
330	0.48708
329	0.49716
328	0.50631
327	0.51264
326	0.51994
325	0.5251
324	0.52877
323	0.53044
322	0.53188
321	0.53114
320	0.53112
319	0.53081
318	0.53179
317	0.52807
316	0.52387
315	0.52081
314	0.52247
313	0.52445
312	0.52674
311	0.52933
310	0.53223
309	0.53544
308	0.53896
307	0.54279
306	0.54693
305	0.55137
304	0.55612
303	0.56118
302	0.56655
301	0.57223
300	0.57821

## Sheet: Fig. 2c
Ex=390 nm
	77K	150K	200K	225K	250K	275K	298K
Wavelength	Intensity	Intensity	Intensity	Intensity	Intensity	Intensity	Intensity
405	669.478	534.171	487.843	2733.39	6573.62	23207.2	51346.1
406	702.7	536.123	420.807	5274.07	10779.6	31422.7	61769.6
407	733.544	542.628	384.79	7990.72	15219.6	40052.5	72736.3
408	762.01	553.688	379.792	10883.3	19893.7	49096.3	84246.3
409	788.099	569.301	405.813	13951.9	24801.8	58554.4	96299.6
410	811.809	589.468	462.853	17196.4	29943.9	68426.6	108896
411	833.142	614.189	550.913	20616.9	35320	78712.9	122036
412	852.097	643.464	669.992	24213.3	40930.2	89413.4	135719
413	757.877	677.293	820.09	27985.7	46774.4	100528	149945
414	759.995	715.676	1001.21	31934.1	52852.7	112057	164715
415	784.58	758.613	1213.34	36058.4	59164.9	124000	180028
416	672.675	806.104	1456.5	40358.6	65711.3	136357	195884
417	830.023	858.149	1730.67	44834.9	72491.6	149128	212283
418	961.092	932.879	2018.52	49402.8	78651.4	162314	228669
419	1041.37	1105.97	2461.69	55338.6	86157.4	175914	249143
420	991.576	1218.6	2983.42	60022.1	93888.1	189927	266974
421	1076.13	1098.45	3348.06	64736.7	102819	205228	286104
422	1024.37	1051.03	3775.71	70305.6	111464	221414	307182
423	1153.19	1071.34	4170.65	76812	119300	239340	326815
424	1211.73	883.044	4548.23	83305.7	127157	257653	345097
425	1234.7	938.472	4843.63	90098.7	137256	274085	365877
426	1298.99	1072.76	4896.18	96663.2	145543	292302	386481
427	1288.58	1421.54	5301.05	102249	155049	309187	405069
428	1294.67	1498.44	5791.81	107879	165818	322223	423326
429	1354.08	1627.85	6355.55	112889	174517	341968	444473
430	1527.46	1600.87	6448.45	118436	183649	357154	464865
431	1809.53	1766.74	7008.08	123330	192679	372053	484512
432	1851.8	2018.82	7378.07	128760	201622	387576	504439
433	1915.88	2282.43	8278.38	134285	209516	401461	520814
434	1970.34	2284.31	9264.91	138773	215963	414750	536971
435	2073.88	2064.22	10336.9	144533	223756	428956	554213
436	2006.28	2547.5	11022.6	149870	232175	444456	570338
437	2082.33	2863.58	12174.4	155039	238844	460074	587029
438	2003.17	3086.82	12803.4	159655	248211	474961	597032
439	1936.34	3284.19	13688.2	167977	256474	486462	607192
440	1995.15	3686.85	13858.6	173512	262871	495299	615319
441	1663.86	3705.62	14465.1	177242	268525	505686	622693
442	1288.12	3485.7	15756.7	183057	272017	513296	631608
443	1448.35	3062.75	17972.7	187046	277611	520910	641118
444	971.76	2919.59	19067.7	190274	282628	528159	644687
445	532.109	3397.72	20491.3	195949	287284	534845	651393
446	336.857	3538.36	22570.5	201513	291254	539685	653396
447	597.997	3546.9	24514.7	208109	293979	543497	655828
448	876.361	4854.76	26560.7	211207	298123	545049	658791
449	1279.48	6152.69	29774	212506	304842	547156	659340
450	1767.87	8404.71	31718.1	213670	307990	548845	658994
451	1872.35	10596.1	34941.5	217835	311479	546498	654720
452	5373.9	13633.8	37751.3	221240	314695	544902	650328
453	8469.41	18435.8	44711.4	226612	316117	544507	650921
454	12350.9	22525.9	51578.1	232094	320047	541014	644977
455	17065.7	28946.3	60940.7	237894	324359	539495	641327
456	22724.7	39031.6	68243.6	246135	329125	537344	636606
457	31335	48826.7	78448.7	254812	335203	533044	630677
458	45417.3	60913.5	91092.1	263754	343261	528346	629147
459	57874.7	77021.8	106048	274125	353279	529025	626561
460	78291.3	95418.6	125709	284905	363085	522606	620826
461	99972	117629	142696	297307	371745	518449	611902
462	124928	140559	164257	310831	382882	514614	601091
463	155092	166680	186570	325230	387843	513094	590933
464	187858	192751	211300	338018	396065	511745	583146
465	220496	222349	239740	351435	405960	511848	580192
466	256273	256519	268641	368572	414854	510743	571700
467	294320	289713	299063	384516	428049	509791	563452
468	329122	326000	330146	401883	438279	504704	553934
469	369074	366726	361373	416927	448540	501800	546613
470	406658	403412	392016	432889	459128	498064	538323
471	441170	440815	425772	446368	466966	496775	530479
472	479500	474760	457786	458456	476207	493312	519760
473	515323	505500	485463	469307	485196	490167	506794
474	543405	533840	506293	482727	491563	486471	495189
475	571660	555716	529501	493755	495470	483442	483226
476	591519	575869	552478	500100	503413	478645	471590
477	606688	594569	572399	510229	506173	473486	463071
478	618783	609707	584993	517763	508349	466621	451628
479	626492	621812	597839	525219	513759	461346	442014
480	631661	628896	604534	528622	518504	453024	435405
481	633747	630372	609783	531734	522858	444994	426994
482	634596	632186	615264	533725	522392	440201	419892
483	628054	629734	619562	532265	516686	432272	406488
484	625891	626430	625880	533888	514116	426058	394537
485	616621	622039	621058	533154	507961	422515	382343
486	610528	613756	622229	529471	505014	413602	373943
487	602852	606453	618064	525926	497045	407688	363514
488	593742	599121	617086	523422	489769	398436	356403
489	587090	596079	611182	519884	483309	391051	350574
490	579875	590103	606337	516156	479976	384327	338768
491	572823	585984	603357	510506	473637	376293	329296
492	565650	583722	596464	505232	466368	370094	320232
493	563817	578476	593903	496379	460039	362778	311280
494	559285	568972	590593	491874	452457	353152	304278
495	553808	564684	587719	485622	446282	344901	293264
496	555452	556586	580256	481082	439726	335959	284213
497	552380	553663	571962	471565	432326	327943	275834
498	547831	549617	565360	464838	424460	320715	269298
499	541953	544958	561096	454602	417338	313815	262756
500	534860	541166	556947	449059	411590	304230	255819
501	531699	535528	549268	443569	400973	298548	248885
502	526569	531836	543926	437676	395999	290921	241594
503	521468	525835	537762	432342	394344	281932	233024
504	515442	520423	531706	425652	388770	277555	228119
505	507768	514630	523948	419852	382503	271260	219653
506	500526	508904	519486	409667	372832	264030	211608
507	490318	504013	517282	401435	364415	256483	204449
508	485380	496839	510194	396325	359797	248564	200117
509	478440	490175	497350	388221	352002	242607	195018
510	472535	484045	490039	381694	345671	233942	190893
511	465739	477482	477470	376024	336658	227523	183779
512	460221	468699	466448	367274	327777	222545	180641
513	457815	457770	458410	360554	322802	216816	175733
514	449218	443620	451020	350762	316506	213598	167530
515	440210	435608	441780	346478	309505	207744	162721
516	431560	423304	431835	339832	304851	202308	159396
517	424006	408336	425134	330034	299257	196730	153621
518	413838	398405	413226	324557	294986	190127	149217
519	403397	390784	403100	318596	286887	185394	142916
520	396075	381328	393102	311001	277893	181337	137834
521	384569	371959	384845	300672	272059	174717	133132
522	372123	364466	374921	293150	266482	169677	128909
523	358386	354861	364968	284327	260710	162930	122106
524	348333	342003	357549	276824	251849	158285	119427
525	335682	332776	350066	266931	245304	154016	114632
526	325543	325089	342013	259908	238585	149915	110022
527	314520	313991	332503	252887	232100	145574	105111
528	302927	302541	324433	245085	224400	140893	100849
529	294592	293819	313114	234344	217398	134710	98352.5
530	285971	284119	302582	223533	207426	129829	95806.6
531	279457	278335	293459	218127	199509	125691	93475.3
532	274757	268503	280509	211926	190812	120278	89925.3
533	265909	261763	270698	205084	182661	115247	86272.8
534	259386	253285	263422	198204	175330	112235	83233.1
535	253102	244665	253623	192021	168906	106760	80562.2
536	244338	235200	248562	185822	161022	102105	78975.9
537	237109	230189	246467	181037	153257	99253.1	75737.4
538	229158	224875	236783	174269	147998	96296.7	72714.7
539	220790	221341	231378	171857	144767	94888.9	71735.3
540	215370	215397	224403	166164	139365	92122.5	68164
541	209867	211111	218329	161394	135301	90607.1	63470.7
542	202657	209848	213115	156164	130353	89783.6	61357.4
543	195209	206495	204918	151607	124485	88009.3	59424
544	187712	203778	197301	146582	123449	85688.8	56373.5
545	180438	198485	191849	140543	121248	83524.5	55380.1
546	174221	197144	185373	135137	119181	82195.6	52737.7
547	169079	190155	180141	129210	115448	80210.9	50211.6
548	161839	183496	175810	123819	111075	79767.4	50781.8
549	158232	179461	172499	121353	108621	78364.3	49124.7
550	154537	171016	167365	118008	105849	76929.8	48040.3
551	148687	163989	160509	115336	104028	76263	46908.4
552	144618	158664	153010	113302	101391	75224.2	47268.2
553	142044	155213	147637	107328	99040.5	72550.1	46725.1
554	139759	148276	140545	103314	95866.5	71086.8	46165.3
555	137250	143642	137729	100027	93689.4	67699.5	43751.4
556	132502	136067	134653	97173.1	91610.5	64843.7	41751.2
557	127316	129567	132273	92789.9	89803.1	61203.7	41190.1
558	122921	126527	129371	88739.1	87445	57712	40579
559	118558	123894	124483	88072.2	83435.3	55034.3	38232
560	114192	120257	122424	85389.9	81024.4	52180.1	36252.9
561	112197	117279	119529	81460.3	77921.4	49770	33750.1
562	109100	110046	116130	80828.4	76555.6	46923.5	32256.4
563	104367	104493	112968	79283.8	72210.9	43580.6	30094.1
564	100912	102029	109240	76679.5	69708.3	41882.9	28149.8
565	97067.7	100911	107631	74888.9	66820.7	39792	26890.8
566	94218.7	97758.1	104043	72781.2	64926.4	38986	25730.5
567	89976.5	94247.4	97261.4	71942.1	64280.2	37949.4	23883.6
568	85958.8	91242.4	94800.5	70713.6	62271.6	36720.1	21836.8
569	81929.5	85813.1	92313.3	68806.1	60523.6	35284.3	20809.1
570	78479.1	82099.4	88232.7	66898.1	58203.3	33750.1	18768.7
571	76012.6	80497.7	84463.6	64555.2	54096.9	32939.7	19790.8
572	71717.6	80110.5	82423.8	64340.5	50889.4	31958.3	20400.8
573	69500.2	79872.8	78722.3	63318.9	49553.9	30705.7	20564.7
574	66016.6	77210.9	75494	60320.4	46761.2	30294.7	20797.7
575	62797.3	76164.3	71183.8	58909.7	44722.2	29431.9	21672.1
576	61169.4	73996.6	69795.2	57135.7	43619.3	29099.2	21615.7
577	59764.5	70880.8	68671.4	53644.4	42496.4	29122.1	20395.1
578	58757.1	67845.6	65911.3	52763	41547.7	29041.5	20291.1
579	54950.5	66394.4	62694.8	48946.9	39839.2	28460	19066.8
580	53227	65102.7	60728.3	46334.4	38991.5	27528.7	18736.1
581	52323.7	64728.8	59907.2	43290.8	36906.1	28023.2	19143
582	51555.5	63949.3	57764	41697.7	35852.3	27120.5	18587.9
583	51454.2	61641.8	55805	42216.1	35868.2	25893.5	17546.7
584	49158.7	59907.2	53319.5	40919.4	36548.5	25319.9	16943.5
585	48748.1	56050.9	52195	39469.4	35725.6	23932.9	16848.8
586	46502.8	53005	51321.5	39058.6	35569.7	23008	16116
587	47186.6	51395.2	50076	36835.3	33871.1	21537.9	15533.6
588	47567.1	51057.4	51008.7	35792.8	34907.6	21001.2	14816.8
589	48068.6	48739.3	49294.8	35762	34111	20338.3	13204
590	46990.9	45909.9	46042.4	34145.8	34437.6	19821.4	12058.9
591	43442.9	43452.8	43307.1	32997.5	34904.1	18689.8	10829.7
592	41598.9	40931.4	42697.7	31992	33707.3	17098.8	10525.1
593	41969.8	38995.3	40681.1	32155	31852	16129.8	10635.7
594	42444.2	38601.5	38652.3	31082.6	28577.1	15528.5	11003.1
595	41110.6	39683.6	35084.8	30107.7	26451.8	13793.6	11162.2
596	38284.5	38746.8	34063.9	30215.9	24933.6	13541.3	10406.1
597	38198.3	37865.8	32398.4	29460.5	24091.7	12795	10626.2
598	36862.2	36389.8	33076.7	28781.6	22733.6	13130.8	9959.41
599	34977.1	35344.5	32675.3	27888.2	22875.3	12418.1	9993.85
600	33463.8	34160.1	31629.7	25203	22032.4	12268.2	9761.49
601	30901.1	32527.8	29414.3	24068.9	19480	11994.3	8916.77
602	28709.6	31658.1	27211.5	23246.9	18759.6	11388	7876.39
603	26461.1	31654.6	24844.2	21105.9	17376.5	11404.7	7227.87
604	25575.3	29659	26105.3	21775.8	15402.9	11240.5	7266.64
605	23105.7	29147.3	25851.4	21232.9	14457.9	10654.5	7079.26
606	21226.8	27923.1	24179.8	22399.9	14350.8	10266.4	6937.19
607	18965.3	26899.7	22150.4	22581.9	13591.7	10725.3	6546.82
608	17963.6	26636.1	21821.5	21930.5	13379.8	10942.3	6349.71
609	17894.7	25137.6	21339.2	21024.7	13559.5	10685.9	6674.73
610	17133.1	24574.9	21610	20086.7	13754.6	10155	5447.04
611	17964.4	23659.4	21949.1	16433	13466	10166	5884.49
612	18077.2	22554.8	22388.9	16609.6	13369.1	9326.57	6090.31
613	16790.2	20980.7	22238.1	16190.4	12833.3	8207.22	6315.22
614	15570.2	19330.5	21912.5	15074.6	13046.7	7681.95	6611.93
615	14602.3	18672.7	23855.5	15976.9	12830.9	6600.99	6624.22
616	15215.4	17842.5	23534.3	14995.2	11475.9	6321.58	6691.14
617	14339.1	16556.5	22449.3	15965.2	10739.3	5590.59	6606.89
618	14805	14776.5	22539.9	14119.3	10252.7	5565.2	6066.94
619	14094	13519.5	21023.4	15026.9	10906.1	5277.59	5435.26
620	13880.7	11375.5	21052.2	15181.4	11157.6	5468.75	5764.83
621	13446	11280	21575.2	15654.7	10816.8	5065.03	5998.52
622	12840.2	11187.8	21343.9	15013.9	10581	4718.97	5887.01
623	13409.7	10557.7	20334.5	13457.5	9786.56	4452.43	6200.53
624	12955.3	9565.17	19179.5	12605.5	9012.15	4401.22	5995.1
625	12164.9	8171.94	18540.8	13533.1	8398.94	4362.75	5379.28
626	11513.2	7127.06	17834.9	14802.9	8104.11	4778.95	4839.83
627	11372.1	6945.36	15927.9	14602.3	6869.03	4441.63	4786.35
628	12257.6	6498.3	14414.7	14948.6	5423.04	4403.11	4532.97
629	12280.4	6660.99	13203.5	14073	5867.75	3313.54	3413.97
630	12851.1	6952.93	12449	14696.1	6464.87	3591.11	3176.84
631	12254.6	7809.95	11213.5	13224	6858.25	4294.43	2986.22
632	12084.3	9354.45	10425.9	12556.7	7192.9	4591.33	2221.16
633	12576.3	9726.68	8135.24	11877.8	7377.45	4580.55	1625.09
634	13629.5	9580.27	9485.72	9674.77	6396.2	4139.71	667.571
635	13706	9720.49	9440.89	8061.34	6322.04	4461.07	1507.23
636	12784	9561.81	9500.6	9847.15	5233.53	5041.32	1734.49
637	11321.4	9053.11	9440.37	9391.1	5720.38	4903.07	1640.7
638	10749.1	7768.02	8762.24	8606.85	5695.73	3579.11	1082.35
639	7825.33	7167.83	8698.6	8192.89	5610.87	3899.96	956.057
640	8355.91	7164.73	7403.43	6225.05	6535.85	4065.18	1070.52
641	8806.22	6904.73	7633.4	6718.84	7121.78	4343.04	1209.03
642	10066.4	6414.53	8202.93	6180.55	7180.38	4275.93	1008.16
643	9469.83	6394.79	7920.19	7623.48	7596.53	4335.34	1517.29
644	8869.23	5405.61	6783.46	6581.95	7783.19	4620.35	1804.93
645	7075.53	6631.63	8293.5	6584.96	8033.45	4280.35	1729.18
646	7599.86	6860.27	8036.77	6137.4	8470.56	4683.52	1962.18
647	6971.49	6051.74	7820.51	5076.21	8514.76	4532.56	2125.53
648	6351.92	6005.59	8194.21	4847.73	8397.67	4755.72	2219.21
649	6678.63	5712.41	7125.75	5408.51	8149.21	5055.8	1783.96
650	5152.21	5212.47	7231.29	5707.09	6917.07	4926.43	1947.09
651	6209.4	5671.5	6653.67	5573.64	6044.8	5010.54	2022.41
652	7650.31	6022.25	7505.09	5103.31	5718.81	4972.89	2009.92
653	8060.32	6659.49	8016.37	5202.29	5726.36	4813.47	1909.61
654	8616.23	6118.02	8081.61	5509.38	4836.85	4880	1652.14
655	8997.36	6897.89	7537.38	5242.13	4567.78	4095.2	1232.04
656	9195.68	6811.61	7199.52	5670.42	3690.55	3851.86	1496.48
657	9811.93	7176.95	5573.76	5231.73	3512.17	3481.02	1643.34
658	9386.92	6522.23	6076.66	4562.64	1616.47	3348.07	528.153
659	8657.66	7403.96	4991.31	4061	2040.83	3210.51	1451.6
660	7624.16	8085.35	4367.71	4548.24	2077.23	3794.96	2408.81
661	6875.38	8069.56	4429.24	4691.23	3363.22	3857.94	2886.68
662	6033.22	8228.98	5046.96	4299.23	3926.49	3560.07	2531.81
663	5104.41	8773.15	4988.04	3719.38	4448.09	3174.56	2896.69
664	6591.21	8691.17	5198.18	3484.21	4947.54	2701.4	3059.24
665	5851.78	8585.08	5183.17	4373.48	4898.11	2547.56	3374.45
666	2660.16	8167.05	5739.62	4025.29	5209.19	2018.81	4506.82
667	2601.67	7339.62	6228.21	3547.1	5563.13	879.208	5406.22
668	2276.54	7413.47	6052.39	2938.92	5954.83	303.466	6072.64
669	1684.79	8011.27	6877.98	2798.81	5807.41	1814.32	6506.1
670	1532.18	7509.25	5991.9	2144.24	5515.84	984.528	7344.79
671	1941.93	6122.55	5812.36	1375.49	5080.11	922.279	7540.23
672	2356.94	6013.68	6047.09	545.918	4500.22	1428.02	7519.58
673	2066.46	5177.67	5602.08	713.978	3210.1	1353.38	7282.85
674	1557.42	4767.85	6327.35	336.499	2030.25	1360.3	7516.22
675	3866.83	4328.78	5329.8	-5.08329	2182.64	1885.45	7092.37
676	4801.52	3316.26	5722.26	-90.8117	2396.17	2791.22	5913.5
677	4496.67	3151.67	5422.5	1132.91	2000.23	3214.67	5347.01
678	4932.06	2277.47	4922.13	1339.67	1451.06	3521.88	4560.57
679	4601.02	2907.88	4221.14	1477.27	1473.51	4257.97	4322.62
680	3840.62	2645.68	3319.55	1545.7	876.751	4493.06	4172.85
681	4659.62	2995.49	2217.35	1544.98	-1129.39	5185.88	3307.8
682	5266	2639.56	2672.8	930.688	-777.644	5373.9	1751.05
683	5057.9	3863.5	1797.32	1039.09	1102.03	5465.46	1957.11
684	5512.66	2704.41	1126.93	1953.21	2543.72	5019.52	1614.77
685	5731.02	3008.09	953.403	1680.13	3280.74	5075.7	-462.178
686	5712.98	3146.07	772.351	2096.83	3891.47	5693.52	-442.732
687	5458.54	2036.11	1334.16	1904.62	4375.91	5731.82	381.775
688	4967.7	2334.63	1733.64	2383.25	4734.07	5674.73	1351.86
689	4240.47	3446.67	1970.8	2753.73	4965.95	5522.24	2499.66
690	3276.84	3693.24	3087.8	3016.08	5071.54	4815.25	3835.49
691	5476.57	3758.38	3372.51	3170.29	5050.84	4635.95	4344.09
692	5254.34	4657.44	3522.46	2673.96	4903.86	4349.96	4728.33
693	4885.66	4722.34	3537.65	2858.44	4630.6	3957.26	4988.2
694	3760.62	4632.66	3418.1	2913.35	4231.04	3457.86	5123.7
695	4405.11	4388.41	4121.96	2838.69	3705.21	2851.76	5134.84
696	4217.63	4900.55	2927.93	2634.44	3053.09	2138.96	5021.62
697	3244.11	4672.5	3293.09	3193.43	2274.68	827.882	4784.03
698	2428.09	4313.97	3503.51	3048.89	2215.72	810.23	3284.63
699	2365.47	3243.93	2964.94	2798.4	1768.44	848.504	3315.33
700	2109.05	2888.56	4011.5	2677.39	1497.56	-211.681	3176.71
701	1658.82	3237.3	4316.98	2777.72	1122.78	661.397	3701.09
702	1225.56	2275.91	4467.39	2770.62	47.541	614.29	3521.08
703	1006.77	2064.36	4462.72	2656.09	-263.844	740.773	3193.77
704	1526.24	2527.1	4302.98	2434.11	-702.699	1445.1	2719.16
705	3039.5	2302.25	3988.16	2104.71	-3144.41	2243.13	2097.24
706	3228.5	1944.65	2191.02	1667.86	92.0396	1958.06	1328.01
707	2569.75	1454.3	1506.21	1936.95	1148.31	2369.68	1178.38
708	3736.94	831.189	1578.43	1575.72	2084.41	2707.65	1158.3
709	3420.97	1703.79	2250.21	1128.57	2900.34	2971.98	516.295
710	4068.69	1396.77	2965.45	1372.81	2930.94	3162.65	2099.55
711	4557.09	1000.08	4560.24	1031.43	3808.86	3279.68	2077.07
712	4886.15	2130.66	4927.37	1403.66	4540.33	3323.06	2009.63
713	4256.83	2132.1	5147	1209.78	5125.32	3292.79	1897.24
714	4630.44	2086.65	5219.13	971.146	5563.86	2535.93	1739.88
715	3984.53	1994.31	5143.76	-55.5445	5855.93	3200.99	1537.57
716	3501.89	1855.07	4920.89	-45.805	6001.54	2673.12	1290.3
717	4033.49	1668.93	4550.51	700.201	5245.55	2979.75	998.072
718	4307.78	1435.9	4032.64	851.112	5441.48	3190.95	660.885
719	5236.01	1155.98	3367.26	949.334	5461.1	3306.7	-528.619
720	4388.54	829.16	2554.38	190.667	5304.41	3327	-588.74
721	4664.38	455.445	3307.94	549.059	4971.41	3886.26	-725.731
722	5630.38	34.8351	2812.19	-12.8933	4462.09	3902.26	-939.591
723	6656.26	-432.67	1356.24	556.489	3776.47	3834.13	469.098
724	6828.55	-78.9669	1934.01	1008.36	3763.77	3681.86	708.434
725	6781.25	-330.225	1804.96	2223.78	3028.82	3445.45	915.859
726	6514.34	-605.413	1563.32	1873.61	2140.03	3124.91	1091.37
727	7028.76	0	1209.1	2711.68	1988.72	1903.87	1234.97
728	6680.12	0	742.288	3420.69	1110.57	2385.87	396.909
729	5101.8	0	162.894	4000.64	102.152	2284.15	908.395
730	4838.1	0	-529.085	4451.55	-164.808	2090.3	1350.43
731	4340.31	0	649.35	4773.4	444.332	2500.93	1723.01
732	4688.53	0	1431.19	4966.19	921.04	2327.7	2026.14
733	4108.31	0	1515.97	5029.94	1265.32	2816.37	2259.82
734	4445.61	0	1566.84	4964.63	1477.16	2701.83	2424.05
735	2620.04	0	1583.8	4770.26	2550.36	2520.79	2518.83
736	2415.61	0	1566.84	4446.85	2852.26	2273.24	2544.16
737	1986.54	0	1515.97	2887.17	3048.02	1726.87	2500.03
738	1251.53	0	1431.19	2808.92	3137.64	1931	2386.46
739	1379.18	-1169.42	1312.49	2557.85	3121.12	2057.67	2203.43
740	2501.38	-637.868	1159.87	3244.53	2998.45	2106.88	1950.95
741	3855.81	-1343.41	973.343	3044.46	2769.65	2078.63	1629.03
742	4182.11	-362.991	752.899	2700.95	3562.94	1972.91	1237.65
743	4331.35	524.136	498.541	2214.01	3524.79	1789.73	776.815
744	4303.53	1317.97	-1194.2	1583.63	3410.35	1529.09	1452.79
745	4036.22	2018.51	-2225.14	2011.35	1920.92	2093.2	1283.86
746	4813.63	2625.76	-1386.02	1523.21	-10890.3	1942.99	1077.39
747	5393.29	3139.72	-689.571	2172.28	-6072.31	2661.36	833.381
748	5775.21	-541.987	1146.17	1906.86	59.4835	2661.9	551.833
749	-1977	1650.1	2015.11	1562.83	5491.23	2617.64	232.746
750	1616.88	3586.74	2775.3	1140.19	10222.9	2528.58	-123.881
751	4699.32	5267.95	3426.73	487.37	14254.6	2394.71	-518.048
752	7270.32	6693.71	3969.39	1045.62	17586.1	2216.04	-949.754
753	7642.33	7864.03	4403.3	1502.05	18666.6	1992.56	0
754	11506.3	8778.91	4728.44	1856.65	21303.1	1724.28	0
755	13796.4	9438.34	4944.83	2109.44	24532.8	1411.2	0
756	15549.5	9842.34	5052.46	2260.41	27371.7	1053.31	0
757	16765.3	9990.89	5051.33	2309.56	29465.1	-3800.39	0
758	15517.9	9884	4941.43	2256.88	30813.1	-1530.22	-1674.85
759	16534.9	7776.91	4722.78	2102.39	28050.6	-210.729	-913.555
760	18784.4	7952.21	4395.37	1846.08	29436.9	974.433	-218.459
761	19234	7803.11	3959.2	1487.94	29944.8	2025.27	410.438
762	19119.2	5510.1	3414.27	2682.24	29574.1	2941.77	973.134
763	20345.1	5539.23	2760.57	2711.27	28325	3723.95	1469.63
764	17613	6919.25	1998.12	2682.24	26197.3	4371.8	1899.93
765	17521.3	6779.74	1126.91	2595.15	23191.1	4885.33	342.296
766	16830	8069.39	146.941	2450.01	19306.4	5264.52	1513.71
767	15538.8	7865.14	-941.79	2246.81	14543.1	5509.39	2542.96
768	13647.8	7357.85	-2139.28	1985.55	8901.36	7005.41	3430.06
769	11157.1	6547.54	-1347.15	1666.24	2381.08	7389.12	4175
770	10241.6	5434.19	0	1288.87	-5171.19	7663.2	4777.78
771	7328.05	4017.82	0	853.439	7820.09	7827.65	5238.41
772	3872.29	2298.41	0	359.954	9299.95	7882.46	5556.88
773	-125.717	6405.22	0	-191.588	9094.38	7827.65	5733.19
774	7191.55	-587.853	0	-801.188	8551.29	7663.2	5767.34
775	6343.87	2251.46	0	-1468.84	7670.69	7389.12	-3449.66
776	2643.92	4678.89	0	0	6452.57	7005.41	440.633
777	2531.75	6694.42	0	0	4896.92	4420.03	3828.73
778	4608.66	8298.06	0	0	5321.17	4564.22	1884.46
779	4732.44	9489.81	0	0	3918.14	4547.25	6463.69
780	4590.68	10269.7	-2545.74	0	4523.96	4369.12	10349.8
781	4183.35	10637.6	-1388.59	0	3384.6	4029.83	13542.8
782	3510.47	10593.7	-332.054	0	2029.48	1126.59	16042.7
783	5449.73	10137.9	623.858	0	458.603	1323.12	20351.8
784	5273.49	11876.9	1479.15	0	3699.36	1299.32	22359.2
785	1866.35	11528.3	2233.82	0	3492.46	1055.17	23739.7
786	2693.73	10836.8	2887.86	0	3202.8	988.555	24493.2
787	3211.48	12520.8	3441.28	0	2830.38	1071.29	21755.7
788	3419.58	12114.3	3894.08	0	2375.21	1303.36	13690.1
789	3498.29	11773.4	4019.47	0	2164.81	1684.77	15707
790	3692.01	11182.4	4075.2	0	1928.94	2215.53	18065.6
791	4000.72	10341.2	4061.27	0	1667.61	2895.64	20766
792	4424.43	9249.87	3977.68	0	1380.82	3725.08	23808.1
793	4963.15	7908.36	3824.42	0	1068.56	4703.87	27191.9
794	5616.86	6316.68	3601.5	0	730.833	5832	30917.5
795	6385.58	4474.84	3308.93	0	367.644	7109.47	34984.9
796	7269.3	2382.83	2946.69	0	-21.0083	8536.29	39393.9
797	8268.02	40.6519	2514.78	0	-435.126	10112.5	44144.8
798	9381.74	-2551.69	2013.22	0	-874.707	11838	49237.3
799	10610.5	-5394.2	1442	0	-1339.75	13712.8	54671.6
800	11954.2	-8486.87	801.108	0	-1830.26	15737	60447.7

## Sheet: Fig. 2d
Lifetime
Ex=390 nm	Em=450_298K		Ex=390 nm	Em=482_77K
Start	0		Start	0
Stop	999000000		Stop	7992000000
Step	1000000		Step	8000000
Fixed/Offset			Fixed/Offset
XAxis	Time(ns)		XAxis	Time(ns)
YAxis	Counts		YAxis	Counts
--	--		--	--
0	5027		0	5096
1000000	3776		8000000	3630
2000000	3327		16000000	3608
3000000	2943		24000000	3419
4000000	2590		32000000	3469
5000000	2481		40000000	3536
6000000	2270		48000000	3311
7000000	2131		56000000	3278
8000000	2008		64000000	3229
9000000	1755		72000000	3273
10000000	1725		80000000	3210
11000000	1599		88000000	3166
12000000	1586		96000000	3119
13000000	1458		104000000	3221
14000000	1390		112000000	3166
15000000	1310		120000000	3040
16000000	1273		128000000	3137
17000000	1279		136000000	2949
18000000	1145		144000000	2962
19000000	1136		152000000	2933
20000000	1053		160000000	2969
21000000	1017		168000000	2856
22000000	987		176000000	2826
23000000	972		184000000	2924
24000000	924		192000000	2741
25000000	912		200000000	2827
26000000	907		208000000	2817
27000000	854		216000000	2683
28000000	794		224000000	2686
29000000	787		232000000	2813
30000000	719		240000000	2686
31000000	754		248000000	2716
32000000	735		256000000	2579
33000000	727		264000000	2623
34000000	656		272000000	2516
35000000	692		280000000	2482
36000000	615		288000000	2508
37000000	569		296000000	2553
38000000	571		304000000	2531
39000000	593		312000000	2427
40000000	531		320000000	2443
41000000	532		328000000	2352
42000000	556		336000000	2394
43000000	502		344000000	2269
44000000	522		352000000	2338
45000000	465		360000000	2320
46000000	511		368000000	2297
47000000	476		376000000	2312
48000000	448		384000000	2233
49000000	456		392000000	2181
50000000	439		400000000	2194
51000000	445		408000000	2205
52000000	423		416000000	2153
53000000	381		424000000	2051
54000000	434		432000000	2100
55000000	364		440000000	2031
56000000	380		448000000	2071
57000000	381		456000000	2110
58000000	382		464000000	2066
59000000	361		472000000	2013
60000000	374		480000000	2006
61000000	352		488000000	1946
62000000	336		496000000	1983
63000000	371		504000000	1926
64000000	332		512000000	1883
65000000	327		520000000	1885
66000000	350		528000000	1885
67000000	279		536000000	1913
68000000	297		544000000	1875
69000000	333		552000000	1826
70000000	307		560000000	1817
71000000	288		568000000	1818
72000000	263		576000000	1809
73000000	252		584000000	1827
74000000	271		592000000	1777
75000000	284		600000000	1772
76000000	269		608000000	1753
77000000	265		616000000	1760
78000000	264		624000000	1659
79000000	285		632000000	1732
80000000	249		640000000	1622
81000000	262		648000000	1715
82000000	231		656000000	1652
83000000	225		664000000	1724
84000000	206		672000000	1577
85000000	228		680000000	1574
86000000	196		688000000	1593
87000000	221		696000000	1611
88000000	226		704000000	1622
89000000	199		712000000	1550
90000000	200		720000000	1587
91000000	201		728000000	1472
92000000	233		736000000	1544
93000000	224		744000000	1557
94000000	211		752000000	1437
95000000	184		760000000	1522
96000000	188		768000000	1466
97000000	179		776000000	1397
98000000	160		784000000	1447
99000000	199		792000000	1452
100000000	180		800000000	1416
101000000	198		808000000	1432
102000000	174		816000000	1407
103000000	164		824000000	1308
104000000	190		832000000	1396
105000000	163		840000000	1408
106000000	169		848000000	1346
107000000	138		856000000	1333
108000000	162		864000000	1360
109000000	152		872000000	1313
110000000	154		880000000	1290
111000000	159		888000000	1265
112000000	149		896000000	1325
113000000	152		904000000	1237
114000000	127		912000000	1345
115000000	158		920000000	1234
116000000	147		928000000	1298
117000000	121		936000000	1262
118000000	139		944000000	1227
119000000	146		952000000	1156
120000000	154		960000000	1201
121000000	115		968000000	1166
122000000	156		976000000	1181
123000000	115		984000000	1157
124000000	118		992000000	1211
125000000	130		1000000000	1164
126000000	123		1008000000	1125
127000000	147		1016000000	1161
128000000	110		1024000000	1180
129000000	106		1032000000	1176
130000000	128		1040000000	1064
131000000	97		1048000000	1126
132000000	124		1056000000	1143
133000000	123		1064000000	1095
134000000	102		1072000000	1047
135000000	84		1080000000	1018
136000000	112		1088000000	1067
137000000	99		1096000000	1026
138000000	123		1104000000	1066
139000000	94		1112000000	1044
140000000	79		1120000000	997
141000000	108		1128000000	941
142000000	98		1136000000	1001
143000000	113		1144000000	1013
144000000	105		1152000000	968
145000000	91		1160000000	957
146000000	86		1168000000	895
147000000	98		1176000000	981
148000000	88		1184000000	929
149000000	74		1192000000	905
150000000	102		1200000000	900
151000000	105		1208000000	910
152000000	78		1216000000	928
153000000	88		1224000000	880
154000000	93		1232000000	883
155000000	90		1240000000	928
156000000	91		1248000000	826
157000000	89		1256000000	917
158000000	60		1264000000	853
159000000	71		1272000000	881
160000000	79		1280000000	884
161000000	80		1288000000	840
162000000	73		1296000000	816
163000000	70		1304000000	835
164000000	81		1312000000	826
165000000	51		1320000000	798
166000000	74		1328000000	880
167000000	79		1336000000	842
168000000	76		1344000000	865
169000000	78		1352000000	775
170000000	82		1360000000	752
171000000	82		1368000000	768
172000000	71		1376000000	731
173000000	65		1384000000	779
174000000	76		1392000000	763
175000000	64		1400000000	742
176000000	71		1408000000	750
177000000	75		1416000000	717
178000000	56		1424000000	752
179000000	69		1432000000	698
180000000	67		1440000000	716
181000000	55		1448000000	688
182000000	63		1456000000	725
183000000	58		1464000000	685
184000000	42		1472000000	661
185000000	64		1480000000	664
186000000	66		1488000000	646
187000000	59		1496000000	696
188000000	59		1504000000	636
189000000	63		1512000000	684
190000000	60		1520000000	663
191000000	62		1528000000	639
192000000	52		1536000000	679
193000000	42		1544000000	621
194000000	49		1552000000	633
195000000	47		1560000000	637
196000000	54		1568000000	600
197000000	45		1576000000	638
198000000	50		1584000000	643
199000000	56		1592000000	665
200000000	42		1600000000	650
201000000	48		1608000000	607
202000000	58		1616000000	618
203000000	54		1624000000	617
204000000	49		1632000000	612
205000000	45		1640000000	622
206000000	59		1648000000	611
207000000	56		1656000000	544
208000000	53		1664000000	573
209000000	49		1672000000	548
210000000	35		1680000000	543
211000000	58		1688000000	579
212000000	51		1696000000	561
213000000	55		1704000000	541
214000000	47		1712000000	511
215000000	36		1720000000	559
216000000	45		1728000000	553
217000000	43		1736000000	544
218000000	54		1744000000	527
219000000	39		1752000000	566
220000000	32		1760000000	485
221000000	43		1768000000	540
222000000	35		1776000000	501
223000000	34		1784000000	501
224000000	42		1792000000	509
225000000	40		1800000000	472
226000000	53		1808000000	494
227000000	43		1816000000	478
228000000	31		1824000000	553
229000000	46		1832000000	505
230000000	35		1840000000	467
231000000	36		1848000000	498
232000000	34		1856000000	450
233000000	31		1864000000	454
234000000	43		1872000000	495
235000000	28		1880000000	425
236000000	42		1888000000	430
237000000	30		1896000000	474
238000000	48		1904000000	464
239000000	43		1912000000	442
240000000	30		1920000000	475
241000000	35		1928000000	466
242000000	33		1936000000	472
243000000	26		1944000000	389
244000000	31		1952000000	412
245000000	29		1960000000	448
246000000	34		1968000000	415
247000000	29		1976000000	448
248000000	28		1984000000	393
249000000	42		1992000000	402
250000000	44		2000000000	383
251000000	32		2008000000	402
252000000	37		2016000000	423
253000000	43		2024000000	397
254000000	27		2032000000	414
255000000	29		2040000000	383
256000000	30		2048000000	409
257000000	34		2056000000	371
258000000	38		2064000000	406
259000000	41		2072000000	391
260000000	29		2080000000	321
261000000	29		2088000000	381
262000000	31		2096000000	366
263000000	38		2104000000	398
264000000	20		2112000000	355
265000000	30		2120000000	363
266000000	28		2128000000	345
267000000	28		2136000000	392
268000000	31		2144000000	355
269000000	28		2152000000	361
270000000	27		2160000000	375
271000000	20		2168000000	333
272000000	22		2176000000	331
273000000	24		2184000000	319
274000000	22		2192000000	374
275000000	32		2200000000	320
276000000	19		2208000000	313
277000000	23		2216000000	312
278000000	27		2224000000	318
279000000	27		2232000000	311
280000000	20		2240000000	308
281000000	18		2248000000	330
282000000	31		2256000000	338
283000000	27		2264000000	343
284000000	21		2272000000	310
285000000	23		2280000000	347
286000000	24		2288000000	321
287000000	16		2296000000	292
288000000	26		2304000000	291
289000000	21		2312000000	293
290000000	19		2320000000	332
291000000	28		2328000000	266
292000000	27		2336000000	288
293000000	25		2344000000	316
294000000	21		2352000000	282
295000000	22		2360000000	289
296000000	21		2368000000	291
297000000	11		2376000000	296
298000000	20		2384000000	269
299000000	18		2392000000	250
300000000	27		2400000000	270
301000000	13		2408000000	293
302000000	21		2416000000	283
303000000	28		2424000000	305
304000000	26		2432000000	280
305000000	22		2440000000	271
306000000	28		2448000000	253
307000000	18		2456000000	287
308000000	23		2464000000	257
309000000	21		2472000000	261
310000000	21		2480000000	258
311000000	20		2488000000	267
312000000	18		2496000000	260
313000000	20		2504000000	279
314000000	25		2512000000	241
315000000	16		2520000000	255
316000000	18		2528000000	267
317000000	16		2536000000	196
318000000	30		2544000000	216
319000000	23		2552000000	208
320000000	19		2560000000	226
321000000	13		2568000000	221
322000000	16		2576000000	235
323000000	8		2584000000	235
324000000	18		2592000000	237
325000000	24		2600000000	239
326000000	25		2608000000	217
327000000	18		2616000000	253
328000000	11		2624000000	239
329000000	9		2632000000	206
330000000	18		2640000000	209
331000000	24		2648000000	225
332000000	9		2656000000	190
333000000	16		2664000000	204
334000000	20		2672000000	198
335000000	26		2680000000	206
336000000	16		2688000000	207
337000000	14		2696000000	219
338000000	14		2704000000	198
339000000	14		2712000000	201
340000000	10		2720000000	207
341000000	17		2728000000	199
342000000	19		2736000000	237
343000000	16		2744000000	195
344000000	17		2752000000	169
345000000	15		2760000000	208
346000000	20		2768000000	211
347000000	19		2776000000	193
348000000	15		2784000000	192
349000000	20		2792000000	204
350000000	8		2800000000	228
351000000	17		2808000000	171
352000000	12		2816000000	171
353000000	16		2824000000	170
354000000	17		2832000000	185
355000000	14		2840000000	199
356000000	22		2848000000	194
357000000	10		2856000000	192
358000000	14		2864000000	163
359000000	12		2872000000	180
360000000	21		2880000000	189
361000000	18		2888000000	173
362000000	15		2896000000	164
363000000	13		2904000000	181
364000000	9		2912000000	171
365000000	23		2920000000	171
366000000	10		2928000000	160
367000000	13		2936000000	171
368000000	11		2944000000	167
369000000	15		2952000000	157
370000000	16		2960000000	142
371000000	16		2968000000	158
372000000	16		2976000000	134
373000000	10		2984000000	152
374000000	12		2992000000	122
375000000	14		3000000000	169
376000000	14		3008000000	155
377000000	9		3016000000	154
378000000	14		3024000000	156
379000000	12		3032000000	155
380000000	14		3040000000	144
381000000	10		3048000000	139
382000000	11		3056000000	143
383000000	11		3064000000	133
384000000	11		3072000000	140
385000000	16		3080000000	142
386000000	12		3088000000	135
387000000	11		3096000000	141
388000000	19		3104000000	153
389000000	13		3112000000	141
390000000	8		3120000000	134
391000000	12		3128000000	142
392000000	18		3136000000	155
393000000	22		3144000000	105
394000000	11		3152000000	120
395000000	7		3160000000	123
396000000	17		3168000000	139
397000000	5		3176000000	140
398000000	7		3184000000	124
399000000	14		3192000000	147
400000000	6		3200000000	108
401000000	11		3208000000	140
402000000	10		3216000000	114
403000000	11		3224000000	122
404000000	17		3232000000	124
405000000	13		3240000000	136
406000000	13		3248000000	130
407000000	8		3256000000	114
408000000	9		3264000000	102
409000000	10		3272000000	117
410000000	6		3280000000	120
411000000	10		3288000000	136
412000000	9		3296000000	112
413000000	10		3304000000	113
414000000	8		3312000000	123
415000000	9		3320000000	126
416000000	4		3328000000	120
417000000	8		3336000000	121
418000000	10		3344000000	114
419000000	10		3352000000	111
420000000	4		3360000000	120
421000000	6		3368000000	116
422000000	6		3376000000	126
423000000	12		3384000000	105
424000000	9		3392000000	123
425000000	9		3400000000	110
426000000	5		3408000000	103
427000000	9		3416000000	99
428000000	7		3424000000	110
429000000	4		3432000000	116
430000000	9		3440000000	106
431000000	7		3448000000	89
432000000	4		3456000000	103
433000000	13		3464000000	107
434000000	9		3472000000	87
435000000	10		3480000000	97
436000000	6		3488000000	95
437000000	13		3496000000	122
438000000	11		3504000000	86
439000000	3		3512000000	110
440000000	5		3520000000	81
441000000	7		3528000000	88
442000000	11		3536000000	81
443000000	7		3544000000	95
444000000	8		3552000000	104
445000000	6		3560000000	103
446000000	10		3568000000	93
447000000	4		3576000000	94
448000000	10		3584000000	93
449000000	9		3592000000	83
450000000	14		3600000000	94
451000000	5		3608000000	83
452000000	8		3616000000	88
453000000	10		3624000000	79
454000000	3		3632000000	95
455000000	6		3640000000	106
456000000	5		3648000000	88
457000000	11		3656000000	88
458000000	7		3664000000	73
459000000	8		3672000000	85
460000000	9		3680000000	79
461000000	3		3688000000	81
462000000	9		3696000000	84
463000000	3		3704000000	94
464000000	9		3712000000	72
465000000	6		3720000000	79
466000000	6		3728000000	79
467000000	4		3736000000	59
468000000	3		3744000000	60
469000000	3		3752000000	81
470000000	2		3760000000	68
471000000	2		3768000000	74
472000000	8		3776000000	76
473000000	4		3784000000	64
474000000	3		3792000000	78
475000000	10		3800000000	83
476000000	8		3808000000	75
477000000	7		3816000000	80
478000000	9		3824000000	61
479000000	5		3832000000	85
480000000	8		3840000000	59
481000000	7		3848000000	62
482000000	4		3856000000	68
483000000	7		3864000000	73
484000000	5		3872000000	72
485000000	4		3880000000	62
486000000	5		3888000000	86
487000000	5		3896000000	69
488000000	7		3904000000	86
489000000	8		3912000000	56
490000000	7		3920000000	65
491000000	5		3928000000	50
492000000	11		3936000000	62
493000000	6		3944000000	66
494000000	2		3952000000	54
495000000	4		3960000000	52
496000000	7		3968000000	54
497000000	13		3976000000	77
498000000	7		3984000000	47
499000000	8		3992000000	52
500000000	8		4000000000	52
501000000	6		4008000000	54
502000000	4		4016000000	68
503000000	3		4024000000	55
504000000	5		4032000000	54
505000000	8		4040000000	47
506000000	4		4048000000	57
507000000	0		4056000000	59
508000000	6		4064000000	52
509000000	7		4072000000	57
510000000	9		4080000000	47
511000000	6		4088000000	66
512000000	5		4096000000	53
513000000	9		4104000000	63
514000000	3		4112000000	53
515000000	6		4120000000	47
516000000	6		4128000000	44
517000000	8		4136000000	52
518000000	6		4144000000	53
519000000	10		4152000000	54
520000000	6		4160000000	56
521000000	6		4168000000	55
522000000	3		4176000000	61
523000000	5		4184000000	59
524000000	6		4192000000	66
525000000	7		4200000000	68
526000000	2		4208000000	42
527000000	1		4216000000	42
528000000	4		4224000000	47
529000000	2		4232000000	60
530000000	5		4240000000	38
531000000	4		4248000000	56
532000000	4		4256000000	48
533000000	4		4264000000	41
534000000	4		4272000000	44
535000000	6		4280000000	48
536000000	6		4288000000	52
537000000	3		4296000000	44
538000000	5		4304000000	53
539000000	3		4312000000	55
540000000	1		4320000000	46
541000000	3		4328000000	56
542000000	7		4336000000	47
543000000	3		4344000000	46
544000000	2		4352000000	39
545000000	3		4360000000	34
546000000	2		4368000000	50
547000000	5		4376000000	35
548000000	0		4384000000	37
549000000	2		4392000000	38
550000000	8		4400000000	48
551000000	12		4408000000	40
552000000	4		4416000000	53
553000000	9		4424000000	49
554000000	7		4432000000	40
555000000	6		4440000000	52
556000000	4		4448000000	44
557000000	7		4456000000	39
558000000	6		4464000000	40
559000000	4		4472000000	36
560000000	1		4480000000	36
561000000	7		4488000000	46
562000000	1		4496000000	44
563000000	3		4504000000	39
564000000	3		4512000000	30
565000000	3		4520000000	29
566000000	6		4528000000	33
567000000	6		4536000000	33
568000000	2		4544000000	48
569000000	3		4552000000	28
570000000	4		4560000000	38
571000000	2		4568000000	27
572000000	2		4576000000	28
573000000	4		4584000000	36
574000000	1		4592000000	31
575000000	4		4600000000	35
576000000	6		4608000000	43
577000000	3		4616000000	34
578000000	4		4624000000	25
579000000	2		4632000000	32
580000000	7		4640000000	34
581000000	1		4648000000	27
582000000	3		4656000000	32
583000000	3		4664000000	39
584000000	3		4672000000	29
585000000	5		4680000000	39
586000000	3		4688000000	26
587000000	2		4696000000	36
588000000	0		4704000000	39
589000000	5		4712000000	29
590000000	1		4720000000	31
591000000	1		4728000000	30
592000000	2		4736000000	24
593000000	3		4744000000	29
594000000	6		4752000000	40
595000000	6		4760000000	29
596000000	2		4768000000	23
597000000	2		4776000000	35
598000000	1		4784000000	20
599000000	3		4792000000	32
600000000	9		4800000000	34
601000000	5		4808000000	29
602000000	4		4816000000	26
603000000	2		4824000000	37
604000000	4		4832000000	35
605000000	7		4840000000	25
606000000	3		4848000000	28
607000000	3		4856000000	32
608000000	3		4864000000	27
609000000	2		4872000000	42
610000000	4		4880000000	35
611000000	4		4888000000	25
612000000	3		4896000000	21
613000000	5		4904000000	33
614000000	3		4912000000	28
615000000	3		4920000000	31
616000000	3		4928000000	34
617000000	4		4936000000	26
618000000	4		4944000000	21
619000000	3		4952000000	25
620000000	4		4960000000	31
621000000	5		4968000000	30
622000000	2		4976000000	27
623000000	3		4984000000	29
624000000	6		4992000000	15
625000000	1		5000000000	34
626000000	1		5008000000	23
627000000	3		5016000000	28
628000000	2		5024000000	31
629000000	2		5032000000	30
630000000	4		5040000000	20
631000000	0		5048000000	24
632000000	3		5056000000	20
633000000	0		5064000000	25
634000000	0		5072000000	17
635000000	3		5080000000	24
636000000	3		5088000000	24
637000000	3		5096000000	23
638000000	4		5104000000	24
639000000	6		5112000000	20
640000000	1		5120000000	27
641000000	3		5128000000	24
642000000	3		5136000000	14
643000000	2		5144000000	25
644000000	2		5152000000	19
645000000	0		5160000000	30
646000000	3		5168000000	25
647000000	1		5176000000	30
648000000	3		5184000000	23
649000000	2		5192000000	18
650000000	2		5200000000	21
651000000	3		5208000000	21
652000000	1		5216000000	22
653000000	1		5224000000	19
654000000	0		5232000000	29
655000000	0		5240000000	16
656000000	0		5248000000	23
657000000	3		5256000000	16
658000000	4		5264000000	29
659000000	5		5272000000	15
660000000	1		5280000000	16
661000000	2		5288000000	24
662000000	3		5296000000	20
663000000	2		5304000000	22
664000000	1		5312000000	23
665000000	4		5320000000	27
666000000	0		5328000000	20
667000000	4		5336000000	19
668000000	3		5344000000	18
669000000	0		5352000000	19
670000000	0		5360000000	23
671000000	4		5368000000	12
672000000	3		5376000000	16
673000000	4		5384000000	14
674000000	3		5392000000	22
675000000	1		5400000000	18
676000000	0		5408000000	14
677000000	3		5416000000	17
678000000	4		5424000000	15
679000000	1		5432000000	23
680000000	2		5440000000	12
681000000	5		5448000000	16
682000000	2		5456000000	17
683000000	2		5464000000	14
684000000	4		5472000000	17
685000000	1		5480000000	22
686000000	0		5488000000	26
687000000	4		5496000000	18
688000000	1		5504000000	12
689000000	1		5512000000	14
690000000	5		5520000000	19
691000000	2		5528000000	9
692000000	1		5536000000	18
693000000	0		5544000000	18
694000000	4		5552000000	15
695000000	1		5560000000	14
696000000	1		5568000000	13
697000000	3		5576000000	17
698000000	0		5584000000	15
699000000	2		5592000000	18
700000000	2		5600000000	19
701000000	2		5608000000	20
702000000	2		5616000000	11
703000000	3		5624000000	12
704000000	1		5632000000	9
705000000	2		5640000000	16
706000000	2		5648000000	18
707000000	3		5656000000	19
708000000	2		5664000000	15
709000000	1		5672000000	12
710000000	1		5680000000	6
711000000	0		5688000000	17
712000000	2		5696000000	15
713000000	0		5704000000	15
714000000	4		5712000000	13
715000000	1		5720000000	7
716000000	0		5728000000	17
717000000	5		5736000000	9
718000000	3		5744000000	18
719000000	1		5752000000	17
720000000	0		5760000000	10
721000000	1		5768000000	10
722000000	0		5776000000	10
723000000	0		5784000000	12
724000000	3		5792000000	12
725000000	0		5800000000	19
726000000	2		5808000000	7
727000000	2		5816000000	9
728000000	2		5824000000	9
729000000	4		5832000000	12
730000000	0		5840000000	14
731000000	0		5848000000	14
732000000	1		5856000000	11
733000000	0		5864000000	11
734000000	3		5872000000	7
735000000	4		5880000000	14
736000000	1		5888000000	12
737000000	0		5896000000	11
738000000	1		5904000000	13
739000000	0		5912000000	11
740000000	1		5920000000	13
741000000	4		5928000000	15
742000000	2		5936000000	10
743000000	1		5944000000	5
744000000	1		5952000000	14
745000000	0		5960000000	9
746000000	0		5968000000	15
747000000	3		5976000000	19
748000000	2		5984000000	12
749000000	0		5992000000	19
750000000	1		6000000000	15
751000000	2		6008000000	15
752000000	1		6016000000	12
753000000	0		6024000000	12
754000000	5		6032000000	13
755000000	0		6040000000	10
756000000	0		6048000000	10
757000000	1		6056000000	9
758000000	1		6064000000	19
759000000	2		6072000000	9
760000000	2		6080000000	7
761000000	0		6088000000	11
762000000	0		6096000000	10
763000000	1		6104000000	6
764000000	2		6112000000	8
765000000	0		6120000000	9
766000000	1		6128000000	6
767000000	0		6136000000	10
768000000	1		6144000000	5
769000000	4		6152000000	11
770000000	1		6160000000	12
771000000	0		6168000000	9
772000000	3		6176000000	8
773000000	1		6184000000	9
774000000	0		6192000000	10
775000000	0		6200000000	7
776000000	0		6208000000	16
777000000	1		6216000000	6
778000000	1		6224000000	10
779000000	2		6232000000	6
780000000	2		6240000000	6
781000000	1		6248000000	15
782000000	0		6256000000	5
783000000	1		6264000000	4
784000000	0		6272000000	7
785000000	1		6280000000	6
786000000	1		6288000000	6
787000000	0		6296000000	11
788000000	0		6304000000	8
789000000	3		6312000000	11
790000000	4		6320000000	8
791000000	1		6328000000	8
792000000	3		6336000000	3
793000000	0		6344000000	8
794000000	2		6352000000	6
795000000	0		6360000000	6
796000000	0		6368000000	1
797000000	3		6376000000	12
798000000	0		6384000000	18
799000000	2		6392000000	10
800000000	2		6400000000	10
801000000	0		6408000000	9
802000000	0		6416000000	11
803000000	2		6424000000	10
804000000	0		6432000000	12
805000000	2		6440000000	10
806000000	0		6448000000	7
807000000	1		6456000000	13
808000000	0		6464000000	11
809000000	2		6472000000	13
810000000	0		6480000000	8
811000000	2		6488000000	7
812000000	1		6496000000	11
813000000	1		6504000000	10
814000000	3		6512000000	6
815000000	0		6520000000	3
816000000	1		6528000000	9
817000000	0		6536000000	8
818000000	2		6544000000	6
819000000	2		6552000000	5
820000000	0		6560000000	8
821000000	1		6568000000	4
822000000	2		6576000000	8
823000000	3		6584000000	6
824000000	1		6592000000	8
825000000	0		6600000000	10
826000000	2		6608000000	8
827000000	2		6616000000	10
828000000	2		6624000000	2
829000000	2		6632000000	7
830000000	0		6640000000	7
831000000	1		6648000000	10
832000000	2		6656000000	4
833000000	1		6664000000	9
834000000	1		6672000000	2
835000000	10		6680000000	7
836000000	1		6688000000	5
837000000	0		6696000000	7
838000000	0		6704000000	10
839000000	1		6712000000	12
840000000	1		6720000000	1
841000000	1		6728000000	5
842000000	0		6736000000	9
843000000	2		6744000000	3
844000000	0		6752000000	6
845000000	0		6760000000	8
846000000	0		6768000000	5
847000000	0		6776000000	8
848000000	0		6784000000	3
849000000	2		6792000000	5
850000000	1		6800000000	6
851000000	0		6808000000	7
852000000	1		6816000000	5
853000000	0		6824000000	7
854000000	0		6832000000	7
855000000	0		6840000000	4
856000000	0		6848000000	3
857000000	1		6856000000	4
858000000	1		6864000000	5
859000000	1		6872000000	5
860000000	1		6880000000	4
861000000	0		6888000000	7
862000000	0		6896000000	3
863000000	2		6904000000	3
864000000	0		6912000000	10
865000000	1		6920000000	9
866000000	0		6928000000	3
867000000	1		6936000000	6
868000000	1		6944000000	3
869000000	2		6952000000	4
870000000	0		6960000000	7
871000000	1		6968000000	7
872000000	1		6976000000	6
873000000	0		6984000000	7
874000000	0		6992000000	7
875000000	1		7000000000	8
876000000	1		7008000000	5
877000000	1		7016000000	8
878000000	0		7024000000	4
879000000	2		7032000000	4
880000000	0		7040000000	7
881000000	2		7048000000	6
882000000	2		7056000000	5
883000000	1		7064000000	2
884000000	2		7072000000	6
885000000	1		7080000000	8
886000000	1		7088000000	3
887000000	0		7096000000	4
888000000	1		7104000000	10
889000000	2		7112000000	5
890000000	2		7120000000	4
891000000	1		7128000000	7
892000000	2		7136000000	3
893000000	0		7144000000	4
894000000	1		7152000000	4
895000000	2		7160000000	2
896000000	0		7168000000	2
897000000	0		7176000000	1
898000000	0		7184000000	5
899000000	1		7192000000	6
900000000	1		7200000000	6
901000000	5		7208000000	5
902000000	1		7216000000	3
903000000	0		7224000000	6
904000000	1		7232000000	7
905000000	1		7240000000	4
906000000	1		7248000000	5
907000000	0		7256000000	4
908000000	1		7264000000	3
909000000	0		7272000000	2
910000000	4		7280000000	4
911000000	0		7288000000	7
912000000	0		7296000000	4
913000000	0		7304000000	3
914000000	0		7312000000	5
915000000	0		7320000000	6
916000000	0		7328000000	2
917000000	0		7336000000	1
918000000	2		7344000000	3
919000000	0		7352000000	7
920000000	2		7360000000	5
921000000	1		7368000000	5
922000000	1		7376000000	4
923000000	1		7384000000	4
924000000	2		7392000000	4
925000000	2		7400000000	5
926000000	1		7408000000	1
927000000	1		7416000000	2
928000000	1		7424000000	6
929000000	2		7432000000	6
930000000	1		7440000000	6
931000000	1		7448000000	1
932000000	1		7456000000	7
933000000	0		7464000000	3
934000000	0		7472000000	8
935000000	0		7480000000	7
936000000	1		7488000000	1
937000000	2		7496000000	6
938000000	0		7504000000	2
939000000	0		7512000000	3
940000000	1		7520000000	3
941000000	0		7528000000	3
942000000	0		7536000000	3
943000000	2		7544000000	3
944000000	0		7552000000	1
945000000	2		7560000000	3
946000000	0		7568000000	4
947000000	0		7576000000	4
948000000	1		7584000000	2
949000000	2		7592000000	1
950000000	1		7600000000	6
951000000	2		7608000000	4
952000000	1		7616000000	2
953000000	2		7624000000	2
954000000	1		7632000000	5
955000000	0		7640000000	1
956000000	0		7648000000	5
957000000	0		7656000000	0
958000000	0		7664000000	8
959000000	0		7672000000	4
960000000	2		7680000000	2
961000000	0		7688000000	3
962000000	1		7696000000	3
963000000	0		7704000000	9
964000000	0		7712000000	3
965000000	1		7720000000	2
966000000	0		7728000000	6
967000000	0		7736000000	4
968000000	1		7744000000	3
969000000	1		7752000000	1
970000000	0		7760000000	4
971000000	1		7768000000	1
972000000	0		7776000000	2
973000000	1		7784000000	1
974000000	0		7792000000	5
975000000	0		7800000000	2
976000000	0		7808000000	4
977000000	0		7816000000	6
978000000	0		7824000000	1
979000000	4		7832000000	1
980000000	0		7840000000	2
981000000	0		7848000000	3
982000000	0		7856000000	3
983000000	1		7864000000	4
984000000	0		7872000000	1
985000000	1		7880000000	2
986000000	0		7888000000	1
987000000	0		7896000000	1
988000000	0		7904000000	1
989000000	1		7912000000	2
990000000	1		7920000000	2
991000000	0		7928000000	4
992000000	0		7936000000	6
993000000	0		7944000000	5
994000000	1		7952000000	2
995000000	0		7960000000	2
996000000	1		7968000000	4
997000000	0		7976000000	2
998000000	0		7984000000	2
999000000	0		7992000000	3

## Sheet: Fig. 2e
	Em λ= 450 nm	Em λ= 482 nm
Temperature	Lifetime	Lifetime
298	102.8	101.9
275	235.8	254.88
250	355	382.2
225	440.6	725.9
200		1054
150		1082.5
77		1086.7

## Sheet: Fig. 2f
Ex=390 nm
Time=	0 ms	200 ms	400 ms	600 ms	800 ms	1000 ms	1200 ms	1400 ms	1600 ms	1800 ms
Start	400	400	400	400	400	400	400	400	400	400
Stop	616	616	616	616	616	616	616	616	616	616
Step	3	3	3	3	3	3	3	3	3	3
Fixed/Offset	0	0	0	0	0	0	0	0	0	0
Xaxis	Em Wavelength	Em Wavelength	Em Wavelength	Em Wavelength	Em Wavelength	Em Wavelength	Em Wavelength	Em Wavelength	Em Wavelength	Em Wavelength
Yaxis	counts	counts	counts	counts	counts	counts	counts	counts	counts	counts
Repeats	0	0	0	0	0	0	0	0	0	0
Dwell Time	0	0	0	0	0	0	0	0	0	0
Scan Polariser	None	None	None	None	None	None	None	None	None	None
Scan Slit	0	0	0	0	0	0	0	0	0	0
Fixed/Offset Polariser	None	None	None	None	None	None	None	None	None	None
Fixed/Offset Slit	0	0	0	0	0	0	0	0	0	0
--	--	--	--	--	--	--	--	--	--	--
400	998.399	13.0251	8.32545	5.8103	4.00995	3.42015	2.5999	2.24	1.82	1.52505
403	347.909	17.6053	11.5052	8.0203	5.82005	4.335	3.465	2.44505	1.97515	1.5198
406	87.2782	27.0208	19.015	12.3255	9.1551	6.61025	5.17505	3.56965	3.01025	2.1551
409	99.1318	43.2716	28.2455	19.9355	14.2602	10.2998	7.55535	5.7497	4.51515	3.4353
412	123.461	54.6418	35.2507	24.0403	17.5854	12.7301	9.65015	6.5702	5.1952	4.09985
415	169.89	77.8109	50.4511	33.931	24.5959	16.9302	12.6549	9.68515	7.65035	5.635
418	226.549	103.307	65.701	43.8167	31.0903	22.2002	16.0205	12.3101	9.21535	7.27485
421	291.286	133.173	82.8069	55.741	40.0057	27.5257	20.4007	15.0348	11.2898	8.5255
424	363.663	165.426	102.601	67.7118	47.4209	33.375	24.2907	17.7949	13.1357	10.18
427	445.067	196.806	120.287	80.3564	55.1112	39.4556	28.5503	21.0353	15.7601	11.6452
430	528.514	228.307	139.299	91.4771	63.9262	44.0955	31.9754	23.725	17.0654	12.8955
433	611.488	260.278	155.873	102.802	68.5014	48.0211	35.1108	25.67	18.7701	14.9305
436	685.919	285.105	172.06	109.607	73.4711	53.4706	38.2909	27.651	19.7149	15.2352
439	743.713	303.277	179.549	115.161	78.9066	54.9221	38.5199	27.9702	21.0805	15.5201
442	795.859	315.51	183.954	119.468	79.8163	54.5959	40.1507	28.645	21.1206	15.7003
445	827.03	322.591	188.578	118.767	81.2364	54.9408	40.7058	29.8956	22.0102	15.75
448	855.382	325.384	188.622	121.653	81.7763	56.6763	40.595	29.9808	21.2804	16.445
451	881.983	335.665	195.526	126.597	85.9313	60.2962	43.1007	31.5656	23.5348	17.2105
454	909.636	351.036	205.785	136.617	94.397	66.7569	48.0959	34.4795	26.4659	19.5902
457	953.545	382.045	230.42	152.579	106.021	75.8976	54.5551	41.9449	30.9513	23.5
460	1002.06	416.441	257.62	175.313	123.046	90.3016	66.916	50.501	37.6951	29.8407
463	1069.74	468.937	298.139	206.345	147.197	110.086	80.947	61.8952	47.2612	36.5753
466	1132.87	527.743	342.528	238.735	175.237	130.257	97.337	74.6661	58.2159	45.4557
469	1197.02	581.052	384.788	276.647	200.354	149.622	114.428	88.219	67.3966	52.071
472	1240.74	626.689	426.743	304.086	225.132	169.897	129.027	100.061	76.8262	60.0556
475	1274.43	663.042	452.371	328.717	245.669	183.893	140.859	109.007	84.3511	67.386
478	1281.38	678.706	467.077	340.696	253.139	192.433	146.467	114.181	89.396	70.1306
481	1249.32	674.95	469.388	344.134	256.243	193.348	149.238	114.66	89.9514	70.2704
484	1201.53	656.893	456.493	332.884	251.114	190.987	147.501	113.123	88.3209	68.8107
487	1144.73	629.578	442.017	324.051	241.971	182.693	143.062	108.322	85.2768	66.2597
490	1078.12	600.687	419.063	308.931	232.487	175.933	135.982	105.571	81.2756	63.5209
493	1019.58	568.057	400.34	296.336	221.307	168.043	128.607	100.906	77.541	62.0507
496	949.814	533.298	376.008	277.122	208.085	158.09	121.966	93.6667	74.1363	57.2606
499	880.943	500.48	355.011	258.053	194.768	150.323	114.967	88.8409	69.1358	54.4954
502	821.51	466.57	332.716	241.899	183.704	139.931	108.037	83.8007	64.8555	50.9562
505	763.304	441.153	312.104	230.18	173.48	132.888	101.757	78.3611	61.6715	47.8453
508	706.626	411.797	291.639	214.978	162.642	126.441	95.1573	74.3452	57.6561	45.0954
511	645.867	374.646	266.961	201.002	150.758	112.911	87.7167	67.806	53.2197	41.1566
514	586.9	346.887	248.833	182.283	138.379	105.042	80.6522	62.7305	50.0708	38.6303
517	533.802	314.36	225.332	165.35	126.881	96.5162	74.3263	56.9607	44.9304	35.2555
520	478.813	287.256	204.498	151.283	113.445	86.1314	67.4961	52.0754	41.0005	31.7808
523	429.884	258.23	184.553	135.407	103.081	80.0005	60.4507	47.5611	37.0652	29.5106
526	384.75	231.467	164.141	122.605	93.2969	70.4609	54.2895	42.6724	33.1596	25.041
529	341.034	204.493	146.707	107.212	82.0763	63.0006	48.4405	37.8002	29.7708	22.7852
532	299.306	182.582	130.792	96.5256	73.2661	55.0959	42.426	33.0998	25.7857	20.7501
535	268.457	161.34	115.499	87.3808	63.8805	49.371	38.4599	29.7651	22.9907	18.415
538	238.776	143.758	103.077	76.0705	57.3511	43.8551	33.4508	26.845	20.8605	16.3352
541	209.172	126.447	90.0564	67.5413	52.1654	38.5911	29.5952	23.5258	18.245	14.2949
544	185.833	111.057	80.3966	60.2707	44.846	34.175	26.8305	20.6897	16.3256	12.6302
547	164.733	100.039	71.5558	53.0812	40.2049	30.9406	23.2551	18.6099	14.6305	11.5952
550	146.669	88.8223	63.6558	48.1463	35.5301	26.9405	21.5203	17.1801	12.9903	10.5548
553	128.19	78.5065	55.9064	41.8803	32.1003	24.2257	18.5801	14.315	11.2403	9.14985
556	113.411	68.0106	49.6967	36.23	27.8557	21.35	16.2453	12.8204	10.4598	7.60025
559	98.7669	61.1208	44.0297	31.7514	25.0248	18.6704	14.8352	11.1956	8.90505	6.87995
562	86.0716	53.4809	37.3805	28.3907	21.7654	17.2306	12.4895	9.9055	7.93495	6.3651
565	76.6869	47.3059	34.0057	26.0898	18.8056	13.8555	10.3153	8.9999	7.11015	5.6252
568	66.5076	40.9806	29.1106	21.9053	16.0352	13.3049	10.3154	7.49985	6.0403	4.97
571	57.8075	35.3513	25.5552	19.4201	14.1151	11.2002	8.83035	6.71515	5.22965	4.1202
574	51.1935	31.7407	21.8502	16.44	12.695	10.0702	7.565	5.93515	4.93015	3.4447
577	44.9431	27.1709	19.5952	14.6952	11.0201	8.5751	6.68	5.135	4.2654	3.2949
580	37.984	23.6949	17.3753	12.3203	9.5304	7.07505	5.59485	4.435	3.84005	3.065
583	33.2236	20.4605	14.6601	11.6252	8.21525	6.35	5.0153	3.885	3.15505	2.555
586	29.2688	17.9409	12.385	9.91995	7.68495	5.7303	4.76	3.60515	2.94495	2.22995
589	26.2789	15.7652	11.6903	8.79515	6.62525	4.69	3.53995	3.0101	2.3651	1.92505
592	23.6691	13.735	9.98065	7.3898	5.5553	4.2098	3.37015	2.8201	2.1299	1.9051
595	19.4942	12.1803	8.42525	6.555	4.6752	3.6147	2.7703	2.23	1.89005	1.53985
598	17.3195	10.5351	7.8003	5.63005	4.4299	3.3149	2.7153	2.14995	1.6049	1.34015
601	15.2045	8.88015	6.62495	4.98	3.6251	2.88515	2.355	1.79495	1.485	1.2251
604	12.539	7.9058	5.71495	4.5399	3.4801	2.5901	1.8951	1.56995	1.365	0.92005
607	11.4346	6.6302	4.91995	3.5802	2.66995	2.2248	1.7752	1.54505	1.27995	0.87505
610	9.64465	5.9552	4.19505	3.28495	2.575	1.80515	1.56995	1.22005	0.88	0.68
613	8.2347	5.12025	3.8198	3.0301	2.30505	1.6301	1.3949	1.06005	0.875	0.61
616	7.3448	4.42505	3.22995	2.3901	1.99505	1.435	1.12	0.81	0.825	0.675

## Sheet: Fig. 2g
	Em λ= 450 nm	Em λ= 482 nm
Temperature	Phos. QY	Phos. QY
298	11.5	4.6
275	8.7	6.6
250	6.7	7.7
225	4.8	9
200	2.1	11.8
150		13.4
77		13.5

## Sheet: Fig. 3b
Ex=390 nm
	77K			150K			200K			225K			250K			275K			298K
Wavelength	Intensity		Wavelength	Intensity		Wavelength	Intensity		Wavelength	Intensity		Wavelength	Intensity		Wavelength	Intensity		Wavelength	Intensity
410	261.341		405	747.575		405	701.032		400	4767.4		405	15915.7		400	17278.7		400	20937.9
411	257.058		406	620.752		406	500.47		401	2883.44		406	10762.5		401	11548.3		401	14064.3
412	259.906		407	508.53		407	325.197		402	1273.29		407	6528.5		402	6786.06		402	8391.21
413	269.887		408	410.907		408	175.211		403	-63.0486		408	3213.7		403	2991.96		403	3918.72
414	286.999		409	327.885		409	50.513		404	-1125.57		409	818.112		404	166.013		404	646.805
415	311.243		410	259.462		410	-48.8972		405	-1914.29		410	-658.274		405	-1691.78		405	-1424.55
416	342.619		411	205.64		411	-123.02		406	-2429.19		411	-1215.46		406	-2581.43		406	-2295.33
417	381.127		412	166.417		412	-171.854		407	-2670.29		412	-853.435		407	-2502.92		407	-1965.55
418	426.767		413	141.794		413	-195.401		408	-2637.57		413	427.789		408	-1456.25		408	-435.199
419	479.539		414	131.771		414	-193.66		409	-2331.04		414	2628.22		409	558.564		409	2295.72
420	539.443		415	136.348		415	-166.632		410	-1750.7		415	5747.85		410	3541.53		410	6227.2
421	606.478		416	155.525		416	-114.315		411	-896.544		416	9786.69		411	7492.66		411	11359.3
422	680.646		417	189.302		417	-36.7108		412	231.419		417	14744.7		412	12411.9		412	17691.9
423	761.945		418	237.679		418	66.1813		413	1633.19		418	20622		413	18299.4		413	25225.1
424	850.376		419	300.656		419	194.361		414	3308.78		419	27418.4		414	25154.9		414	33958.8
425	945.939		420	378.233		420	347.829		415	5258.18		420	35134.1		415	32978.7		415	43893.1
426	706.155		421	576.008		421	545.283		416	6259.23		421	42967.2		416	40332.9		416	56521.6
427	812.323		422	743.62		422	764.888		417	6951.75		422	51697.6		417	49144.1		417	67403.3
428	1214.65		423	681.924		423	581.899		418	8244.38		423	59857.3		418	58026.8		418	79046.5
429	1523.77		424	774.221		424	876.831		419	9909.19		424	71540.9		419	65457.8		419	89574.3
430	1683.27		425	741.357		425	708.925		420	13744.5		425	84129.4		420	76332.3		420	103352
431	1861.21		426	855.946		426	812.385		421	17656.1		426	96731.5		421	93074.1		421	119677
432	2072.35		427	953.808		427	869.394		422	20688.8		427	111006		422	104976		422	139242
433	2170.66		428	1195.91		428	1512.6		423	26625.2		428	125435		423	121910		423	158596
434	2716.1		429	1284.81		429	1798.93		424	32895.7		429	140592		424	141493		424	181506
435	2619.71		430	1621.04		430	1422.21		425	42203.9		430	158531		425	159079		425	205095
436	3139.31		431	1645.09		431	2700.16		426	50295.5		431	176522		426	181163		426	232491
437	3730.66		432	1828.1		432	3974.81		427	58135.4		432	199785		427	198152		427	250953
438	3844.19		433	2009.38		433	4544.1		428	65948.1		433	223156		428	226175		428	278475
439	4222.97		434	2308.06		434	5465.93		429	76712.3		434	249177		429	252034		429	307020
440	4540.57		435	2378.74		435	5624.14		430	89070.9		435	274813		430	282864		430	340140
441	4822.82		436	2462.9		436	8147		431	100562		436	299994		431	325237		431	372399
442	4294.94		437	2981.95		437	9884.02		432	113927		437	326623		432	358877		432	403663
443	4329.84		438	3118.27		438	13342.1		433	126326		438	352247		433	396641		433	438237
444	4204.34		439	3168.68		439	14479.3		434	147359		439	376327		434	437032		434	475314
445	4531.57		440	2558.8		440	16384.1		435	165180		440	404756		435	482412		435	508586
446	5116.69		441	2687.56		441	19483.2		436	182351		441	433477		436	530541		436	548551
447	5208.4		442	2800.32		442	22157.9		437	202517		442	462501		437	567363		437	583811
448	5119.67		443	2369.64		443	24880.9		438	219622		443	490500		438	608192		438	618414
449	4725.9		444	2896.02		444	28133		439	243611		444	527004		439	648810		439	654532
450	4088.58		445	3206.44		445	32328.5		440	263665		445	558084		440	686529		440	702826
451	4537.64		446	2860.93		446	35938.8		441	291986		446	589889		441	726418		441	741952
452	2805.25		447	3651.1		447	39203.3		442	319401		447	615913		442	772024		442	785243
453	2814.21		448	5033.64		448	42832.8		443	344008		448	639426		443	807863		443	823280
454	4010.26		449	5417.49		449	46021		444	373413		449	660946		444	839923		444	855800
455	5521.89		450	6077.76		450	51475.4		445	396161		450	686522		445	878572		445	889143
456	4916.59		451	6025.88		451	54874.2		446	421563		451	709073		446	910347		446	921312
457	7304.02		452	6542.4		452	60222.6		447	445222		452	731900		447	948190		447	943212
458	6034.08		453	8616.71		453	66862.2		448	470496		453	748127		448	975720		448	962990
459	9275.57		454	11426.6		454	71472.2		449	494959		454	766027		449	1006500		449	991576
460	15215.6		455	13278.5		455	77122.6		450	521262		455	782820		450	1038830		450	1015810
461	23728.7		456	15502.8		456	84572.4		451	544832		456	800388		451	1062910		451	1038650
462	33575.6		457	17909.5		457	87419.3		452	567276		457	817541		452	1072800		452	1061620
463	44000.3		458	21762.2		458	95063.6		453	590636		458	831705		453	1100070		453	1077250
464	52381		459	24443.1		459	102059		454	612287		459	847941		454	1114990		454	1092020
465	63872.5		460	30349.9		460	112992		455	634050		460	864015		455	1120850		455	1110380
466	74647.5		461	39357.6		461	121455		456	651664		461	879524		456	1137820		456	1120240
467	91293.5		462	50146.6		462	131073		457	668134		462	894335		457	1138570		457	1131180
468	110291		463	56673.7		463	141896		458	684220		463	903573		458	1153240		458	1147240
469	134542		464	66205.1		464	154959		459	700449		464	912349		459	1153870		459	1149220
470	164751		465	75099		465	163277		460	714631		465	918617		460	1167790		460	1154900
471	198729		466	88192		466	179359		461	725670		466	921105		461	1174330		461	1159720
472	236656		467	105376		467	198076		462	738360		467	929623		462	1173230		462	1162200
473	277251		468	122145		468	218224		463	749844		468	931573		463	1181410		463	1163080
474	318102		469	140064		469	237865		464	764252		469	937861		464	1187210		464	1162380
475	360650		470	166881		470	270713		465	774226		470	946344		465	1187230		465	1161390
476	404986		471	193994		471	295202		466	782625		471	949312		466	1179420		466	1163380
477	449290		472	219898		472	329037		467	791688		472	950778		467	1164830		467	1157240
478	494957		473	249506		473	363745		468	801268		473	955431		468	1155760		468	1154220
479	541021		474	279046		474	401444		469	815537		474	961553		469	1149390		469	1148600
480	588262		475	322806		475	443386		470	825013		475	959200		470	1141500		470	1145700
481	632945		476	368944		476	484135		471	840324		476	955874		471	1140500		471	1129330
482	675494		477	408242		477	528392		472	848633		477	949081		472	1134180		472	1117600
483	720426		478	451050		478	570146		473	853879		478	947776		473	1118480		473	1096460
484	763754		479	496224		479	612155		474	862703		479	949420		474	1113240		474	1081930
485	805020		480	536817		480	656654		475	865034		480	947638		475	1105880		475	1073810
486	844272		481	583969		481	706482		476	871289		481	937780		476	1093460		476	1056180
487	884024		482	627564		482	744326		477	876592		482	936016		477	1088430		477	1042400
488	919922		483	673873		483	794803		478	883469		483	931189		478	1070200		478	1031090
489	957487		484	719112		484	835081		479	889360		484	923881		479	1065660		479	1020260
490	989277		485	768836		485	882246		480	897037		485	921843		480	1049830		480	1002560
491	1017550		486	807116		486	920531		481	902405		486	917522		481	1034370		481	983903
492	1041140		487	854355		487	956374		482	907403		487	906043		482	1016490		482	969895
493	1060200		488	897122		488	989172		483	914730		488	896263		483	1009050		483	947907
494	1076610		489	933997		489	1018770		484	922987		489	886334		484	983858		484	933285
495	1093020		490	969703		490	1048680		485	932200		490	872952		485	962811		485	918630
496	1104620		491	998443		491	1070760		486	932470		491	859793		486	945623		486	899520
497	1115380		492	1025520		492	1091710		487	935228		492	838919		487	919213		487	879577
498	1123210		493	1047670		493	1102300		488	944007		493	820756		488	903155		488	852544
499	1129440		494	1064000		494	1106620		489	946317		494	805547		489	881343		489	827326
500	1134550		495	1078580		495	1105030		490	952961		495	787578		490	865931		490	808094
501	1133910		496	1095990		496	1105450		491	955159		496	769120		491	842149		491	792965
502	1131260		497	1096160		497	1102110		492	955345		497	753441		492	826796		492	771093
503	1124070		498	1102790		498	1104960		493	960337		498	731336		493	807724		493	750867
504	1116690		499	1102730		499	1098380		494	959024		499	717833		494	786093		494	732014
505	1109710		500	1108940		500	1099810		495	955196		500	699549		495	761485		495	715341
506	1101490		501	1100140		501	1086100		496	952771		501	680419		496	734412		496	689672
507	1092210		502	1091650		502	1074720		497	947230		502	661663		497	711378		497	667474
508	1082840		503	1083650		503	1059900		498	937392		503	647551		498	685126		498	642958
509	1067880		504	1073830		504	1046000		499	931360		504	631751		499	669050		499	620343
510	1054110		505	1066220		505	1030550		500	918553		505	616363		500	646447		500	603339
511	1036510		506	1048160		506	1011950		501	906260		506	602349		501	626805		501	587563
512	1017630		507	1018740		507	985515		502	889556		507	588560		502	607997		502	569082
513	1002050		508	997085		508	964639		503	865539		508	576348		503	589569		503	554768
514	988606		509	973367		509	944663		504	845435		509	566184		504	575094		504	541819
515	971815		510	952699		510	929097		505	825736		510	548545		505	557868		505	528933
516	957299		511	935215		511	909832		506	805418		511	530935		506	545087		506	509040
517	945591		512	910686		512	887540		507	786857		512	523231		507	531008		507	494769
518	934701		513	897079		513	883213		508	765828		513	510966		508	519246		508	478551
519	921356		514	878775		514	860414		509	749555		514	489302		509	509526		509	462891
520	906375		515	863103		515	849168		510	734290		515	474368		510	491727		510	448719
521	895440		516	839538		516	825153		511	718761		516	455847		511	477807		511	433931
522	886787		517	829111		517	808483		512	703559		517	439376		512	460748		512	421027
523	873256		518	814149		518	792431		513	689290		518	428158		513	448979		513	405590
524	864977		519	797210		519	781571		514	674007		519	415995		514	437246		514	395138
525	851737		520	782170		520	769766		515	658565		520	403215		515	428145		515	378002
526	838821		521	773227		521	754623		516	642067		521	391495		516	416454		516	367865
527	821749		522	767306		522	736999		517	630694		522	373327		517	408718		517	348819
528	802542		523	763525		523	716817		518	616648		523	363488		518	399341		518	338230
529	786202		524	751322		524	699808		519	600007		524	354946		519	388800		519	328036
530	770022		525	744668		525	684887		520	592792		525	342264		520	379271		520	313723
531	748856		526	733919		526	675581		521	578243		526	331980		521	368299		521	306423
532	735136		527	719237		527	667739		522	563340		527	322147		522	359720		522	293928
533	717165		528	713896		528	661262		523	554902		528	309482		523	345407		523	283423
534	700684		529	703320		529	646413		524	538188		529	303188		524	331584		524	269208
535	685361		530	696164		530	638995		525	526917		530	294873		525	318014		525	260696
536	669483		531	681160		531	620444		526	513808		531	285616		526	305918		526	248620
537	652489		532	665636		532	603800		527	498374		532	279950		527	293174		527	240275
538	636444		533	650174		533	593833		528	483224		533	276526		528	280847		528	232383
539	621555		534	630062		534	580897		529	474019		534	272607		529	274433		529	224328
540	604181		535	604930		535	567963		530	455738		535	269566		530	264449		530	219104
541	580488		536	586340		536	549111		531	439237		536	264077		531	254601		531	214707
542	559129		537	564220		537	529371		532	420947		537	258003		532	247799		532	207128
543	539320		538	549279		538	520977		533	402545		538	250437		533	239978		533	203161
544	524574		539	533980		539	510581		534	391552		539	242155		534	234954		534	195944
545	503446		540	520699		540	495235		535	382288		540	231668		535	223558		535	190017
546	487487		541	496983		541	480023		536	371305		541	223557		536	214281		536	182941
547	475306		542	478494		542	468766		537	363144		542	219068		537	205165		537	178650
548	460340		543	464591		543	456289		538	351376		543	209978		538	200836		538	177606
549	439238		544	441746		544	442162		539	346135		544	198986		539	188043		539	172332
550	426078		545	423957		545	430623		540	340910		545	193562		540	180650		540	168663
551	414059		546	410116		546	416338		541	334181		546	189330		541	172804		541	165282
552	402608		547	399090		547	409135		542	321281		547	185805		542	168199		542	158488
553	390249		548	390475		548	398329		543	312728		548	180897		543	163642		543	155353
554	378691		549	378311		549	383635		544	303342		549	175954		544	157481		544	149123
555	366658		550	369097		550	372762		545	293926		550	168941		545	153340		545	143813
556	352525		551	364129		551	355804		546	286659		551	161719		546	147095		546	140092
557	336025		552	354266		552	345267		547	277058		552	152353		547	145786		547	132399
558	324222		553	347301		553	335575		548	269226		553	151002		548	142599		548	129267
559	316789		554	333842		554	324456		549	266215		554	146962		549	137380		549	124129
560	304313		555	322257		555	315470		550	260988		555	138291		550	133590		550	116675
561	289826		556	308063		556	311307		551	251385		556	133033		551	128011		551	115705
562	283196		557	297160		557	299988		552	243916		557	128027		552	125033		552	110775
563	273151		558	287024		558	290160		553	241104		558	123575		553	121849		553	104614
564	267523		559	283108		559	283824		554	233449		559	122933		554	122129		554	98944.3
565	263516		560	273014		560	272755		555	227882		560	120425		555	120229		555	97557.9
566	261653		561	264932		561	263120		556	221957		561	112620		556	117312		556	93131.6
567	256912		562	252969		562	254936		557	216962		562	109973		557	110204		557	91220
568	252176		563	243419		563	244501		558	207969		563	106983		558	107778		558	90462.5
569	247297		564	232075		564	231523		559	201421		564	104196		559	102906		559	88071.2
570	236103		565	223180		565	222629		560	193535		565	99662.4		560	95359.1		560	88747.5
571	227452		566	218856		566	211394		561	187080		566	93933.1		561	89737.3		561	86215.7
572	220982		567	213740		567	207314		562	179296		567	90055.9		562	85350.5		562	82967.6
573	213120		568	208423		568	203441		563	171227		568	83655.3		563	82774.6		563	79820.6
574	209759		569	201319		569	198724		564	167796		569	80207.3		564	79718.8		564	75604.8
575	197490		570	193115		570	186859		565	163689		570	78097.6		565	74612.2		565	70011.3
576	188527		571	184147		571	184033		566	159086		571	75491.9		566	71446.8		566	68404.4
577	182822		572	179101		572	179746		567	151717		572	73851.9		567	66498.1		567	64927.2
578	177159		573	174673		573	179154		568	143489		573	71624.3		568	62545.9		568	63015.5
579	165158		574	165879		574	174569		569	140023		574	71804.5		569	58054.3		569	59427.8
580	165589		575	162416		575	169595		570	133158		575	68532.6		570	55716.4		570	57491.2
581	158995		576	161773		576	165541		571	125660		576	66508.3		571	51446.4		571	52228.1
582	153916		577	158958		577	157747		572	117360		577	64644.6		572	48866.2		572	47863.9
583	146917		578	155455		578	150108		573	114060		578	63636.4		573	46528.4		573	43026.8
584	139881		579	151778		579	144143		574	110088		579	62500.7		574	44318.2		574	39235.7
585	137904		580	147769		580	140606		575	104332		580	61161.4		575	46308.5		575	36369.5
586	130882		581	142028		581	135246		576	100708		581	60329.6		576	45107.7		576	34775.9
587	127618		582	135389		582	132792		577	97553.8		582	59737.8		577	46061.9		577	34331.8
588	126260		583	130705		583	128235		578	92408		583	58222.8		578	44925.9		578	33560.4
589	119815		584	125066		584	122572		579	89622.8		584	55119.1		579	43180.3		579	33048.2
590	115802		585	117520		585	122956		580	86511.3		585	52938.6		580	42272.9		580	32543.3
591	112032		586	111936		586	121435		581	83061.6		586	52364.9		581	40788.8		581	32883.4
592	108942		587	109292		587	115124		582	80479		587	49904.8		582	41531.8		582	30561.4
593	107765		588	107396		588	109906		583	79564.6		588	47142.2		583	41343.4		583	26983.8
594	107251		589	104682		589	106476		584	77060.3		589	44150.9		584	41284.4		584	27934.9
595	106071		590	101427		590	100089		585	76359.7		590	41423.5		585	39294.2		585	29367.5
596	104763		591	99049.4		591	97314.3		586	73093.1		591	38744.5		586	37763.6		586	30411.3
597	98923.4		592	94153.4		592	93232.9		587	69660.6		592	38562.1		587	36583.5		587	31047.2
598	93740.8		593	90544		593	88830.2		588	69806.4		593	38425		588	35109.9		588	29106
599	93480.9		594	88499.5		594	84714		589	68845.2		594	36809.4		589	33283.3		589	30643
600	90241.2		595	84660.8		595	87112.8		590	66362.2		595	34957.8		590	30683.6		590	29710.1
601	88079.6		596	82610.2		596	84931.7		591	63884.7		596	32557.4		591	30179.7		591	28787.8
602	83694.9		597	81314.2		597	82753.6		592	60844.7		597	31527.4		592	27656.4		592	28174.9
603	80466.5		598	76620.6		598	80193.8		593	58600.4		598	29203.3		593	26552.4		593	29092.2
604	77025.4		599	71487.2		599	78839.6		594	59154.1		599	28144.9		594	24387.6		594	28180.2
605	69522.1		600	67270.5		600	75628.6		595	57577		600	26944.3		595	21093.9		595	28940.3
606	67053		601	63305.2		601	73502.3		596	55291.3		601	25452.1		596	18435.2		596	28864.3
607	66427.4		602	60314.7		602	72529		597	51522		602	22298.7		597	17550.3		597	28921.4
608	66397.3		603	59327.6		603	71469.3		598	50119		603	20519.7		598	15988.1		598	29029.7
609	62089.8		604	55049.2		604	69024		599	47990.4		604	20470.4		599	14555.1		599	28003.6
610	65195.8		605	56451.4		605	68144.7		600	44945.3		605	18343.1		600	13425.2		600	26731.9
611	63044.8		606	55849.8		606	63099.1		601	44901		606	18675.8		601	11731.7		601	24603.9
612	62136.1		607	52940.1		607	61378		602	44549.5		607	17868		602	11244.2		602	22531.6
613	57335.4		608	50774.2		608	60278.4		603	43915.6		608	17655.4		603	11665.4		603	21091.8
614	57682.1		609	51574.9		609	57167		604	43554.3		609	17871.8		604	9996.72		604	21845
615	57618.5		610	50939.3		610	55583.8		605	39377.5		610	18344.3		605	10805.3		605	20727.1
616	56384.1		611	46131.2		611	53031.4		606	37266		611	16303.9		606	11225.9		606	21793.6
617	55608		612	45048.5		612	50428.2		607	37434.3		612	16542		607	10972.8		607	20045.9
618	53894.9		613	42759.8		613	51153.7		608	35235.9		613	16336.6		608	10842.9		608	19864.1
619	53409.7		614	42892.2		614	50372.4		609	35396.4		614	16480.1		609	11590.2		609	19211.2
620	54348.5		615	41533.1		615	50086.5		610	33553.7		615	17479.9		610	11666.7		610	17600.6
621	52417.3		616	41845.6		616	46937.1		611	29664.4		616	16321.9		611	12323		611	16508.8
622	49740.7		617	40800.3		617	44424.6		612	29292.3		617	15881		612	12638.5		612	15092.7
623	49961.8		618	39820.3		618	41494.6		613	29927.7		618	17724		613	11617.1		613	13374.1
624	49687.7		619	39313.5		619	40619.4		614	29538.8		619	19992.3		614	11235.5		614	14777
625	47282.2		620	40846.6		620	39737.4		615	28156		620	19620.7		615	10560.3		615	13756.9
626	44348.7		621	41860.2		621	40618.7		616	27315.9		621	20299.3		616	11207		616	12161
627	39530.8		622	42008.5		622	40008.9		617	28070.7		622	20658.9		617	10602.9		617	10176
628	35720.1		623	42455.9		623	38317		618	27634.8		623	18789.6		618	11368.7		618	8695.76
629	36487.4		624	42764		624	35641.2		619	25857.2		624	19428.1		619	10875.1		619	9186.11
630	34603.8		625	41883.5		625	34937.7		620	25648.9		625	19465.2		620	10669.6		620	7631.09
631	29959.5		626	40069.3		626	30670.3		621	25386.2		626	19733.7		621	10226.9		621	6691.37
632	27401.8		627	35906.4		627	27995		622	25351.4		627	19914.5		622	10133.5		622	5693.26
633	26010.2		628	33067.4		628	25740.3		623	22849.2		628	19054.5		623	10520.9		623	6363.49
634	23322.6		629	30846.2		629	23097		624	24503.4		629	17001.2		624	11154.7		624	6146.42
635	20178.5		630	26292.7		630	19468.6		625	24703.4		630	16961.1		625	11716.5		625	6376.15
636	19960.9		631	24542.8		631	16358.1		626	25240.8		631	16836.1		626	11720		626	5811.49
637	18397.9		632	23996		632	16026.3		627	25573.5		632	16258.7		627	11575.2		627	6981.5
638	18003.8		633	19457.6		633	15730		628	25052.5		633	17230.2		628	10724.9		628	5508.81
639	17112.9		634	15831.6		634	14695.3		629	22766.4		634	17716.7		629	11094.3		629	5342.08
640	16830.9		635	18829.8		635	12627.8		630	22210.7		635	17663.6		630	9804.23		630	4969.87
641	15224.2		636	18276.4		636	11709.1		631	22291.8		636	17491.4		631	9135.47		631	4392.17
642	13664.4		637	17832.7		637	13175.4		632	23170.9		637	17152.5		632	10203.4		632	4111.55
643	10596.7		638	20702.2		638	12709.1		633	21670.5		638	17208.6		633	9767.33		633	3731.58
644	11979.1		639	23516.6		639	12727.4		634	18830		639	17356.2		634	9535.08		634	3669.34
645	12153.7		640	23827		640	14083.4		635	15438.5		640	16408.9		635	10079.6		635	3529.14
646	10109.6		641	22903.9		641	13512.5		636	15156.2		641	15237.4		636	10011.5		636	4856.73
647	10034.4		642	23804.1		642	14489.1		637	16782.4		642	16321.2		637	9670.81		637	3442.96
648	10077.1		643	24611.6		643	11358.9		638	16445.4		643	14875.7		638	10215.6		638	4279.19
649	11768.1		644	26500.3		644	12651.6		639	15985.8		644	13106		639	10290.8		639	4544.83
650	10887.3		645	24364.5		645	14298.8		640	13190.5		645	12270.8		640	9676.28		640	5215.2
651	8695.32		646	25508.9		646	16242.8		641	12524.8		646	10222.8		641	7369.55		641	5671.43
652	7610.17		647	25181.9		647	17421.6		642	13482.3		647	9197.03		642	6791.7		642	6161.65
653	4749.11		648	25053.6		648	18930		643	12518.4		648	8109.11		643	6589.31		643	6479.92
654	5866.59		649	26243		649	18613.1		644	11357.5		649	6464.5		644	6324.5		644	7225.73
655	2795.1		650	27722.6		650	18199.6		645	8996.78		650	4556.82		645	5980.73		645	7376.43
656	2924.28		651	26223.3		651	17933		646	9498.87		651	3780.34		646	5567.7		646	6570.39
657	2668.54		652	25164.8		652	18290		647	5420.3		652	2466.5		647	5105.26		647	5881.69
658	4757.81		653	23256.6		653	19464.1		648	6990.49		653	-552.753		648	6156.95		648	6783.85
659	5989.03		654	20687.4		654	20048.4		649	6762.45		654	1785.5		649	2663.14		649	6163.36
660	6792.66		655	19082.6		655	20816.7		650	8661.02		655	858.92		650	4218.63		650	4797.59
661	7276.17		656	16921.1		656	19360		651	8991.89		656	485.466		651	5167.68		651	5523.49
662	11511.9		657	14991.9		657	18078.4		652	9789.56		657	177.648		652	6179.17		652	5769.92
663	11223.1		658	13504.7		658	17797.3		653	9605.6		658	-43.0427		653	7180.11		653	7232.21
664	12491.5		659	10376.6		659	19566.3		654	11693		659	-1363.75		654	7467.37		654	7923.6
665	13479.6		660	7626.85		660	20449.4		655	12412.2		660	-832.201		655	7572.5		655	8366.9
666	14187.5		661	8281.84		661	20912.3		656	13132.9		661	473.391		656	7495.5		656	8562.13
667	14615.1		662	5225.76		662	22932.3		657	11498.3		662	1630.63		657	7236.37		657	6953.88
668	13549.6		663	2714.44		663	24324		658	11467.8		663	2639.51		658	6795.1		658	7713.94
669	13849.8		664	4888.81		664	22623		659	11114.7		664	4330.45		659	6171.71		659	9693.77
670	13839.7		665	8263.46		665	22980.4		660	10964.9		665	5286.86		660	5366.18		660	10315
671	13519.5		666	6043.08		666	21932.5		661	11082.3		666	6109.71		661	6077.31		661	10671.6
672	14017.2		667	4154.58		667	21313.9		662	11936.2		667	5761.49		662	5045.19		662	10763.3
673	13408.5		668	4463.37		668	20161.4		663	10232.6		668	5685.99		663	2389.41		663	10590.4
674	12509.8		669	4625.14		669	18475.2		664	7388.29		669	6810.96		664	3910.85		664	11023.3
675	11456.2		670	4243.96		670	17318.2		665	9132.21		670	6695.79		665	4557.62		665	11463.1
676	10739.9		671	2926.87		671	14800.3		666	12002.9		671	7830.48		666	5894.24		666	11028.2
677	11081.3		672	4380.99		672	14710.7		667	12869.1		672	8755.36		667	6381.28		667	10359.8
678	10172.6		673	6561.39		673	13651.9		668	13383.7		673	8548.35		668	6671.82		668	11368.2
679	7854.17		674	7636.04		674	15873		669	12336.8		674	9382.95		669	5655.27		669	9665.67
680	6809.94		675	8382.18		675	15586.4		670	11324.5		675	9985.04		670	5949.46		670	9296.16
681	5466.59		676	10111.7		676	13054.7		671	12847.9		676	10354.6		671	6019.81		671	7722.49
682	5241.59		677	11277.3		677	10591		672	13102.6		677	10491.7		672	7871.76		672	8266.44
683	3716.9		678	11137.9		678	9071.7		673	10565.6		678	10396.2		673	8084.25		673	7839.93
684	3938.47		679	12033.3		679	7138.75		674	9663.5		679	11236.4		674	8108.63		674	7180.33
685	3211.48		680	12591.9		680	6276.11		675	8874.62		680	9196.76		675	7944.92		675	6287.66
686	4747.1		681	12813.6		681	7048.42		676	10515.8		681	9419.1		676	7593.11		676	5161.9
687	4968.06		682	11125.1		682	8431.73		677	10658.2		682	9384.85		677	6101.04		677	4902.25
688	4980.7		683	11160.3		683	8939.79		678	15960.5		683	9094.02		678	5713.09		678	4740.41
689	4785.04		684	13740		684	8153.21		679	16797.4		684	9881.54		679	5113.58		679	3583.82
690	6364.75		685	15364.5		685	6164.89		680	17602.3		685	9470.17		680	7163.05		680	2437.76
691	6335.9		686	16869.7		686	5156.16		681	18531.4		686	8826.01		681	7613.57		681	3917.98
692	6134.1		687	17994		687	5352.98		682	19076.9		687	7949.05		682	7896.94		682	2641.19
693	5759.35		688	18737.5		688	7410.26		683	19238.7		688	6839.31		683	7077.7		683	3676.85
694	7049.15		689	19100		689	7669.81		684	17885.2		689	5496.78		684	7360.82		684	2710.36
695	6868.94		690	18065.5		690	6848.09		685	17684		690	5574.53		685	7453.73		685	2880.87
696	6548.53		691	18029.2		691	7153.28		686	17071.3		691	6696.17		686	7356.44		686	2872.78
697	6087.92		692	17586.8		692	7225.96		687	16047.1		692	6470.98		687	7068.95		687	1739.75
698	5487.11		693	16738.6		693	7066.14		688	16538.1		693	6079.96		688	6591.25		688	4934.13
699	6421.8		694	15484.5		694	5654.34		689	15257.6		694	5523.09		689	5923.35		689	5652.45
700	6033.45		695	13824.4		695	7074.2		690	13599.9		695	3872.47		690	5065.24		690	5226.59
701	5534.77		696	11758.4		696	7050.13		691	12446.7		696	3315.32		691	4016.93		691	6012.97
702	4925.77		697	11062.8		697	8484.44		692	11047.6		697	2569.47		692	1778.21		692	6630.23
703	4206.43		698	10388.2		698	8500.94		693	8032.43		698	3068.55		693	2402.61		693	6084.92
704	3376.77		699	8632.91		699	6031.98		694	8393.62		699	3751.23		694	4102.79		694	6718.78
705	2436.78		700	8634.96		700	6470.36		695	10848.1		700	3293.64		695	4515.87		695	6144.16
706	2920.06		701	8747		701	6654.78		696	10155.9		701	3069.16		696	3783.81		696	5690.88
707	2210.47		702	9345.26		702	6852.69		697	9170.53		702	3152.55		697	4259.15		697	6460.91
708	7.34277		703	9056.02		703	7415.43		698	7892.05		703	3096.69		698	4562.81		698	5910.41
709	-1800.57		704	6038.43		704	7720.53		699	6320.43		704	4175.72		699	4694.8		699	6575.16
710	-203.895		705	6111.93		705	7768.01		700	6127.28		705	4216.12		700	6189.7		700	8528.82
711	129.098		706	5865.14		706	7557.87		701	6196.11		706	4139.98		701	5270.25		701	7987.33
712	-1126.64		707	6763.3		707	8530.52		702	4776.84		707	3947.3		702	5779.99		702	10075.9
713	-521.031		708	6306.86		708	9586.87		703	3125.17		708	3638.09		703	6116.85		703	10940.5
714	-76.5322		709	6927.76		709	9452.61		704	4558.65		709	3212.34		704	6280.83		704	11558.1
715	1800.76		710	6286.33		710	9110.6		705	5121.21		710	2670.06		705	6271.93		705	11928.7
716	2391.83		711	5375.17		711	9923.33		706	5841.76		711	4529.77		706	6090.15		706	12052.2
717	4338.78		712	4194.26		712	9566.57		707	5336.87		712	4495.16		707	5735.49		707	10769.9
718	1585.37		713	6949.03		713	9026.35		708	4716.4		713	4388.9		708	6523.61		708	10813.3
719	1737.49		714	7891.81		714	8302.67		709	3980.36		714	4211.01		709	6210.15		709	10581.1
720	4087.07		715	7633.03		715	7395.54		710	3128.74		715	3961.48		710	5747.26		710	10073.4
721	4268.31		716	8567.46		716	7583.65		711	3759.84		716	3640.3		711	6475.44		711	10609.3
722	6835.62		717	8370.73		717	6685.69		712	3147.16		717	3247.48		712	6107.96		712	9938.42
723	7254.92		718	8028.94		718	5627.07		713	2447.4		718	2783.02		713	5614.95		713	10268.6
724	9920.51		719	7542.08		719	4407.79		714	1660.55		719	2246.92		714	6288.96		714	9462.26
725	10284.2		720	6910.16		720	4398.3		715	2350.45		720	1639.18		715	5925.05		715	9741.77
726	12994.8		721	5890.05		721	4620.17		716	1849.39		721	959.798		716	5458.64		716	6209.87
727	15327.1		722	5969.19		722	276.626		717	-375.14		722	1442.23		717	4889.74		717	6072.27
728	17281.2		723	5887.72		723	529.82		718	-400.246		723	982.347		718	4218.34		718	5439.13
729	18857.1		724	3900.29		724	585.552		719	-525.551		724	472.807		719	3444.46		719	5689.89
730	20054.6		725	4120.94		725	1852.49		720	-751.056		725	-1614.15		720	2568.08		720	5654.65
731	20874		726	4138.01		726	1927.61		721	-1076.76		726	-395.213		721	1589.21		721	6714.71
732	21315		727	3951.47		727	1830.38		722	-1699.41		727	-168.613		722	507.844		722	4889.05
733	21377.9		728	3561.34		728	1560.8		723	-4980.5		728	-1622.94		723	-951.071		723	5006.88
734	21062.4		729	2967.62		729	1118.87		724	-1407.37		729	-2749.16		724	-1239.11		724	6196.04
735	20368.7		730	3863.85		730	3665.88		725	738.602		730	-1535.03		725	-259.178		725	6114.79
736	16805.3		731	3361.03		731	3809.04		726	2704.12		731	-2320.33		726	-376.728		726	5431.58
737	16244.9		732	2684.81		732	3836.2		727	4489.18		732	761.062		727	790.848		727	7293.88
738	15244.9		733	3464.33		733	5460.77		728	6093.79		733	2586.98		728	891		728	7825.42
739	15754.4		734	692.128		734	1378.75		729	7517.94		734	4245.5		729	921.779		729	7745.69
740	16432.8		735	4211.13		735	3157.08		730	3879.02		735	3799.64		730	883.185		730	8831.15
741	12553.5		736	5122.82		736	4742.05		731	6686.05		736	3776.64		731	775.219		731	9629.72
742	9332.61		737	5896.07		737	6133.65		732	9192.36		737	2142.41		732	2199.95		732	11692.6
743	11370.7		738	6530.88		738	7331.88		733	11398		738	5892.19		733	2424.43		733	12373.7
744	8451.51		739	7027.24		739	8336.74		734	13302.8		739	9274.13		734	2608.1		734	12795.5
745	9170.76		740	4957.64		740	9148.23		735	14907		740	12288.2		735	724.578		735	12958
746	9451.08		741	6044.09		741	9766.36		736	16210.4		741	14934.5		736	1550.32		736	12912.6
747	9934.72		742	6932.31		742	10191.1		737	17213.2		742	17212.9		737	2285.34		737	12749.9
748	10621.7		743	7622.29		743	10422.5		738	17915.2		743	19123.4		738	2929.63		738	12470
749	11512		744	8114.04		744	10460.5		739	15571.4		744	20666.1		739	3483.2		739	12072.9
750	12605.6		745	8407.56		745	10305.2		740	16652.4		745	21841		740	3946.03		740	11558.6
751	13902.6		746	8459.02		746	10153		741	17365		746	22109.8		741	-254.451		741	10927.1
752	15402.8		747	8458.39		747	9897.37		742	17709.3		747	22125.9		742	1660.01		742	10178.3
753	17106.5		748	8405.67		748	9538.32		743	17685.3		748	21889.4		743	3371.11		743	9312.4
754	19013.4		749	8300.84		749	9075.86		744	17292.9		749	21400.2		744	4878.87		744	8329.24
755	21123.7		750	8143.92		750	8509.98		745	16532.2		750	20658.3		745	3747.36		745	7228.87
756	23437.2		751	7934.9		751	7840.67		746	16095.7		751	19663.8		746	4643.98		746	6011.29
757	25954.2		752	7673.79		752	7067.95		747	15539.6		752	18416.6		747	5656.94		747	4676.49
758	28674.4		753	7360.58		753	6191.81		748	14863.9		753	16916.7		748	6786.23		748	3224.49
759	31598		754	6995.27		754	5212.26		749	14068.7		754	15164.2		749	8031.86		749	1655.27
760	34724.9		755	6577.86		755	4129.28		750	13153.9		755	13158.9		750	9393.82		750	-31.163
			756	6108.36		756	2942.88		751	12119.5		756	10901.1		751	10872.1
			757	5586.76		757	1653.06		752	10965.6		757	8390.52		752	12466.8
			758	5013.06		758	259.827		753	9692.13		758	5627.3		753	14177.7
			759	4387.26		759	-1236.83		754	8299.09		759	2611.42		754	16005.1
			760	3709.37		760	-2836.9		755	6786.49		760	-657.137		755	17948.7
									756	5154.32					756	20008.7
									757	3402.59					757	22185
									758	1531.29					758	24477.7
									759	-459.562					759	26886.7
									760	-2569.98					760	29412

## Sheet: Fig. 3c
Ex=390 nm
	298K			77K			298K			77K
	1 wt.%			1 wt.%			10 wt.%			10 wt.%
Wavelength	Intensity		Wavelength	Intensity		Wavelength	Intensity		Wavelength	Intensity
405	0.06983		400	0.0069		400	0.01146		410	0.00794
406	0.08795		401	0.00699		401	0.00729		411	0.00779
407	0.1066		402	0.00708		402	0.00406		412	0.00766
408	0.1258		403	0.00716		403	0.00177		413	0.00754
409	0.14554		404	0.00723		404	0.00041608		414	0.00744
410	0.16583		405	0.00729		405	0		415	0.00734
411	0.18666		406	0.00735		406	0.000521603		416	0.00727
412	0.20802		407	0.0074		407	0.00198		417	0.00721
413	0.22994		408	0.00745		408	0.00438		418	0.00716
414	0.25239		409	0.00748		409	0.00771		419	0.00712
415	0.27539		410	0.00751		410	0.01198		420	0.0071
416	0.29696		411	0.0074		411	0.01719		421	0.00709
417	0.3225		412	0.00736		412	0.02334		422	0.0071
418	0.34734		413	0.00735		413	0.03043		423	0.00712
419	0.37636		414	0.00733		414	0.03845		424	0.00716
420	0.4051		415	0.00734		415	0.04741		425	0.00721
421	0.43261		416	0.00754		416	0.05731		426	0.00727
422	0.46068		417	0.00758		417	0.06815		427	0.00735
423	0.4858		418	0.00733		418	0.07992		428	0.00744
424	0.50989		419	0.00765		419	0.09263		429	0.00755
425	0.54135		420	0.00783		420	0.10628		430	0.00767
426	0.57067		421	0.00817		421	0.12087		431	0.00781
427	0.60126		422	0.00823		422	0.13639		432	0.00795
428	0.63102		423	0.00821		423	0.15285		433	0.00812
429	0.66332		424	0.00803		424	0.17025		434	0.00829
430	0.69102		425	0.00802		425	0.18859		435	0.00849
431	0.71863		426	0.00801		426	0.21135		436	0.00877
432	0.74889		427	0.00803		427	0.23233		437	0.00886
433	0.77716		428	0.00835		428	0.25429		438	0.00884
434	0.79757		429	0.00854		429	0.27845		439	0.00844
435	0.81732		430	0.00851		430	0.30913		440	0.00784
436	0.83602		431	0.00865		431	0.33731		441	0.00777
437	0.86051		432	0.0089		432	0.36787		442	0.00661
438	0.87922		433	0.00929		433	0.39693		443	0.00591
439	0.89814		434	0.00939		434	0.42473		444	0.00571
440	0.91116		435	0.00943		435	0.45457		445	0.00552
441	0.92531		436	0.00956		436	0.48464		446	0.0041
442	0.93257		437	0.00969		437	0.51237		447	0.00352
443	0.93744		438	0.00949		438	0.53897		448	0.000986595
444	0.95289		439	0.0099		439	0.57085		449	6.17748e-05
445	0.96589		440	0.00958		440	0.59944		450	0
446	0.96979		441	0.00943		441	0.62783		451	0.000848381
447	0.98009		442	0.0094		442	0.65693		452	0.00191
448	0.98942		443	0.0085		443	0.68427		453	0.00295
449	1		444	0.00784		444	0.71006		454	0.00256
450	0.99666		445	0.0085		445	0.7394		455	0.00327
451	0.9992		446	0.00805		446	0.76463		456	0.0027
452	0.9959		447	0.00777		447	0.793		457	0.0064
453	0.98878		448	0.00816		448	0.81791		458	0.00845
454	0.98357		449	0.00928		449	0.83702		459	0.00987
455	0.97951		450	0.01091		450	0.85766		460	0.01306
456	0.97356		451	0.01304		451	0.87844		461	0.01694
457	0.9676		452	0.01562		452	0.89814		462	0.02642
458	0.95188		453	0.01806		453	0.91524		463	0.03626
459	0.94171		454	0.02676		454	0.9306		464	0.04781
460	0.9317		455	0.03502		455	0.94745		465	0.06144
461	0.92074		456	0.04512		456	0.96081		466	0.08073
462	0.90473		457	0.05729		457	0.97239		467	0.09849
463	0.89235		458	0.07179		458	0.97975		468	0.11846
464	0.88131		459	0.09234		459	0.98349		469	0.13997
465	0.86394		460	0.12278		460	0.99129		470	0.16064
466	0.84535		461	0.1505		461	0.99594		471	0.1851
467	0.84253		462	0.19285		462	1		472	0.20942
468	0.83103		463	0.236		463	0.99616		473	0.23976
469	0.81387		464	0.28572		464	0.99672		474	0.27333
470	0.78868		465	0.34353		465	0.9943		475	0.30594
471	0.77833		466	0.40332		466	0.9881		476	0.34008
472	0.76451		467	0.46217		467	0.98191		477	0.3745
473	0.74954		468	0.52405		468	0.97977		478	0.413
474	0.73811		469	0.58738		469	0.97205		479	0.44818
475	0.72285		470	0.64285		470	0.96585		480	0.48873
476	0.70772		471	0.70432		471	0.9541		481	0.52504
477	0.69705		472	0.75843		472	0.94471		482	0.56602
478	0.68316		473	0.80544		473	0.93305		483	0.60536
479	0.6781		474	0.86084		474	0.92245		484	0.64805
480	0.66378		475	0.90474		475	0.90873		485	0.68534
481	0.64866		476	0.93405		476	0.89932		486	0.72285
482	0.6406		477	0.96284		477	0.88317		487	0.7588
483	0.62739		478	0.97526		478	0.87037		488	0.79162
484	0.61123		479	0.98845		479	0.85854		489	0.82205
485	0.59824		480	0.99788		480	0.84476		490	0.85035
486	0.5847		481	0.99577		481	0.82758		491	0.87713
487	0.57757		482	1		482	0.81135		492	0.90013
488	0.55846		483	0.99068		483	0.79294		493	0.91908
489	0.54006		484	0.98408		484	0.77511		494	0.94091
490	0.52409		485	0.97237		485	0.75991		495	0.95924
491	0.50959		486	0.95738		486	0.74065		496	0.97275
492	0.49118		487	0.93691		487	0.7229		497	0.98503
493	0.47175		488	0.92407		488	0.70657		498	0.99279
494	0.45935		489	0.90858		489	0.69297		499	0.99725
495	0.44868		490	0.89373		490	0.67459		500	1
496	0.43782		491	0.89459		491	0.66072		501	0.99842
497	0.42583		492	0.88485		492	0.64437		502	0.99102
498	0.41407		493	0.88044		493	0.62906		503	0.9822
499	0.40158		494	0.88502		494	0.61346		504	0.97173
500	0.38764		495	0.88123		495	0.60046		505	0.95888
501	0.38082		496	0.87375		496	0.58195		506	0.94444
502	0.37356		497	0.86618		497	0.56658		507	0.9317
503	0.36284		498	0.85527		498	0.54914		508	0.91432
504	0.36029		499	0.8541		499	0.53336		509	0.89712
505	0.35945		500	0.8512		500	0.52107		510	0.88002
506	0.35288		501	0.83759		501	0.50967		511	0.86357
507	0.34417		502	0.83042		502	0.49444		512	0.84943
508	0.3413		503	0.81879		503	0.48116		513	0.82933
509	0.32992		504	0.80763		504	0.46935		514	0.81305
510	0.31842		505	0.79478		505	0.45634		515	0.79587
511	0.30802		506	0.7835		506	0.44236		516	0.77968
512	0.2958		507	0.76993		507	0.42784		517	0.75812
513	0.28422		508	0.7603		508	0.41216		518	0.73757
514	0.2779		509	0.74599		509	0.40012		519	0.7187
515	0.26892		510	0.74239		510	0.38881		520	0.69995
516	0.25941		511	0.73754		511	0.37546		521	0.68295
517	0.24896		512	0.72371		512	0.36295		522	0.66791
518	0.23887		513	0.71461		513	0.34889		523	0.65468
519	0.22726		514	0.70422		514	0.33918		524	0.63823
520	0.21824		515	0.69801		515	0.32737		525	0.62152
521	0.20903		516	0.68543		516	0.3151		526	0.60767
522	0.20369		517	0.66598		517	0.3051		527	0.59442
523	0.20127		518	0.65451		518	0.29404		528	0.5842
524	0.20058		519	0.64173		519	0.28187		529	0.57321
525	0.19496		520	0.62369		520	0.27309		530	0.56517
526	0.18577		521	0.60335		521	0.26295		531	0.55144
527	0.1807		522	0.59054		522	0.25628		532	0.54338
528	0.17766		523	0.56885		523	0.24677		533	0.53006
529	0.1682		524	0.54863		524	0.24077		534	0.52112
530	0.164		525	0.53114		525	0.23151		535	0.50543
531	0.15808		526	0.50983		526	0.22401		536	0.49367
532	0.14908		527	0.49041		527	0.2139		537	0.48197
533	0.14495		528	0.47557		528	0.2078		538	0.46934
534	0.14079		529	0.45958		529	0.20085		539	0.45548
535	0.13379		530	0.44953		530	0.19541		540	0.44468
536	0.12863		531	0.43914		531	0.19105		541	0.43295
537	0.12239		532	0.42813		532	0.18419		542	0.42126
538	0.11523		533	0.4221		533	0.17868		543	0.41115
539	0.10945		534	0.41397		534	0.1723		544	0.40246
540	0.1032		535	0.40549		535	0.16717		545	0.39036
541	0.09941		536	0.39314		536	0.16001		546	0.37593
542	0.09734		537	0.37983		537	0.15602		547	0.36286
543	0.09249		538	0.36637		538	0.15076		548	0.35032
544	0.0892		539	0.35434		539	0.14694		549	0.33775
545	0.08545		540	0.34397		540	0.1427		550	0.32739
546	0.08061		541	0.33333		541	0.13976		551	0.31374
547	0.08042		542	0.32107		542	0.13438		552	0.3019
548	0.07761		543	0.30734		543	0.13073		553	0.29353
549	0.07781		544	0.29655		544	0.12509		554	0.28441
550	0.07676		545	0.28369		545	0.12196		555	0.27453
551	0.07575		546	0.27253		546	0.11783		556	0.26852
552	0.0734		547	0.26539		547	0.11602		557	0.26117
553	0.06969		548	0.2588		548	0.11437		558	0.25221
554	0.06593		549	0.25119		549	0.11182		559	0.2441
555	0.06368		550	0.24489		550	0.10874		560	0.23691
556	0.06317		551	0.24464		551	0.10604		561	0.23157
557	0.06054		552	0.23906		552	0.10152		562	0.22556
558	0.05776		553	0.23345		553	0.09947		563	0.21841
559	0.0562		554	0.22424		554	0.09546		564	0.214
560	0.0528		555	0.21572		555	0.09155		565	0.2058
561	0.05461		556	0.21333		556	0.09014		566	0.19779
562	0.0542		557	0.20458		557	0.08561		567	0.18937
563	0.05371		558	0.19481		558	0.08336		568	0.18352
564	0.05345		559	0.18894		559	0.07971		569	0.17729
565	0.05384		560	0.18459		560	0.07533		570	0.17235
566	0.05302		561	0.17982		561	0.07293		571	0.16706
567	0.05388		562	0.17672		562	0.06896		572	0.16348
568	0.052		563	0.17189		563	0.06476		573	0.15712
569	0.05167		564	0.16347		564	0.06129		574	0.1534
570	0.04903		565	0.15589		565	0.05965		575	0.15053
571	0.05043		566	0.15225		566	0.05728		576	0.14684
572	0.04844		567	0.14786		567	0.05513		577	0.14314
573	0.04658		568	0.14397		568	0.05419		578	0.14075
574	0.04604		569	0.13879		569	0.05207		579	0.13634
575	0.04438		570	0.12886		570	0.05175		580	0.13057
576	0.04376		571	0.12369		571	0.05029		581	0.12595
577	0.03986		572	0.11694		572	0.04841		582	0.12128
578	0.03707		573	0.11143		573	0.04495		583	0.11733
579	0.03503		574	0.10573		574	0.04329		584	0.11567
580	0.03512		575	0.10283		575	0.04099		585	0.11121
581	0.03655		576	0.10253		576	0.04002		586	0.10838
582	0.03599		577	0.09796		577	0.03852		587	0.10567
583	0.03328		578	0.09538		578	0.03676		588	0.10058
584	0.03281		579	0.09227		579	0.03561		589	0.0967
585	0.03156		580	0.09044		580	0.03482		590	0.09516
586	0.03021		581	0.08998		581	0.03291		591	0.09188
587	0.02825		582	0.08899		582	0.03136		592	0.08921
588	0.02754		583	0.08756		583	0.03049		593	0.08663
589	0.02663		584	0.08341		584	0.02935		594	0.08328
590	0.02603		585	0.0818		585	0.02889		595	0.08098
591	0.02567		586	0.07897		586	0.02753		596	0.07755
592	0.02416		587	0.08049		587	0.02829		597	0.07551
593	0.02338		588	0.07908		588	0.02864		598	0.07412
594	0.02228		589	0.07666		589	0.02867		599	0.07119
595	0.02208		590	0.0745		590	0.02849		600	0.06877
596	0.02067		591	0.07601		591	0.02851		601	0.06735
597	0.01838		592	0.07546		592	0.02714		602	0.06791
598	0.01852		593	0.07197		593	0.02622		603	0.06568
599	0.01803		594	0.06998		594	0.02655		604	0.06454
600	0.01949		595	0.0704		595	0.02626		605	0.06382
601	0.01865		596	0.07094		596	0.0267		606	0.06301
602	0.01878		597	0.06843		597	0.02664		607	0.06048
603	0.01715		598	0.06437		598	0.02628		608	0.05836
604	0.0192		599	0.06153		599	0.02623		609	0.05835
605	0.01848		600	0.057		600	0.02527		610	0.05715
606	0.01866		601	0.05299		601	0.02464		611	0.05583
607	0.01747		602	0.05183		602	0.02444		612	0.054
608	0.01847		603	0.04836		603	0.02411		613	0.05197
609	0.01792		604	0.04363		604	0.02329		614	0.05062
610	0.0174		605	0.03931		605	0.02313		615	0.04859
611	0.01628		606	0.03721		606	0.02284		616	0.04781
612	0.01521		607	0.037		607	0.02153		617	0.04697
613	0.01373		608	0.03574		608	0.02077		618	0.04581
614	0.01305		609	0.03535		609	0.01959		619	0.04391
615	0.01274		610	0.03431		610	0.01848		620	0.04478
616	0.01207		611	0.03184		611	0.01701		621	0.04135
617	0.01141		612	0.0301		612	0.01589		622	0.03992
618	0.01123		613	0.03031		613	0.01538		623	0.03891
619	0.0103		614	0.03342		614	0.0155		624	0.03852
620	0.01041		615	0.03268		615	0.0153		625	0.03741
621	0.00968		616	0.03222		616	0.01509		626	0.03619
622	0.00979		617	0.02928		617	0.01409		627	0.03524
623	0.0085		618	0.0277		618	0.01312		628	0.03436
624	0.00942		619	0.02733		619	0.01292		629	0.03286
625	0.00863		620	0.02715		620	0.01242		630	0.0322
626	0.00796		621	0.02763		621	0.0117		631	0.03007
627	0.00833		622	0.02809		622	0.01093		632	0.02859
628	0.00912		623	0.02544		623	0.00997		633	0.02871
629	0.0092		624	0.02561		624	0.01038		634	0.02747
630	0.00989		625	0.02597		625	0.00996		635	0.02597
631	0.00976		626	0.0248		626	0.00933		636	0.02396
632	0.01029		627	0.02347		627	0.00806		637	0.02274
633	0.01052		628	0.02381		628	0.00769		638	0.02182
634	0.01244		629	0.02311		629	0.00833		639	0.02174
635	0.01124		630	0.02527		630	0.00791		640	0.02056
636	0.01223		631	0.02588		631	0.00767		641	0.01911
637	0.01461		632	0.0278		632	0.00781		642	0.01755
638	0.01645		633	0.02819		633	0.00841		643	0.01558
639	0.0171		634	0.02692		634	0.00852		644	0.01451
640	0.0182		635	0.02609		635	0.00886		645	0.01213
641	0.01947		636	0.02631		636	0.00861		646	0.01262
642	0.01971		637	0.02473		637	0.00891		647	0.01251
643	0.0194		638	0.02318		638	0.00893		648	0.01291
644	0.01933		639	0.02195		639	0.00842		649	0.01238
645	0.0168		640	0.02275		640	0.00747		650	0.01293
646	0.01604		641	0.01755		641	0.00759		651	0.01322
647	0.01699		642	0.01793		642	0.00739		652	0.01304
648	0.01634		643	0.01756		643	0.00804		653	0.01162
649	0.01596		644	0.01972		644	0.0087		654	0.01333
650	0.01541		645	0.01926		645	0.00886		655	0.01382
651	0.01381		646	0.01738		646	0.00976		656	0.01377
652	0.01258		647	0.01555		647	0.00865		657	0.014
653	0.01121		648	0.01586		648	0.00928		658	0.0137
654	0.01068		649	0.01695		649	0.00964		659	0.01479
655	0.00865		650	0.01877		650	0.0102		660	0.01469
656	0.01012		651	0.0187		651	0.01101		661	0.0145
657	0.01089		652	0.01528		652	0.01129		662	0.01423
658	0.0103		653	0.01628		653	0.01151		663	0.01422
659	0.00955		654	0.01826		654	0.01196		664	0.01458
660	0.00966		655	0.02086		655	0.0121		665	0.01371
661	0.00901		656	0.02135		656	0.01217		666	0.01341
662	0.00709		657	0.02103		657	0.01218		667	0.01303
663	0.00565		658	0.01991		658	0.01246		668	0.01371
664	0.00584		659	0.01912		659	0.01177		669	0.01404
665	0.00455		660	0.018		660	0.01178		670	0.01397
666	0.0072		661	0.01658		661	0.01117		671	0.01382
667	0.00935		662	0.01968		662	0.01148		672	0.01531
668	0.01056		663	0.01866		663	0.0118		673	0.01534
669	0.01157		664	0.01718		664	0.01177		674	0.01475
670	0.01237		665	0.01522		665	0.01166		675	0.01476
671	0.01296		666	0.01281		666	0.01149		676	0.0142
672	0.01335		667	0.00993		667	0.01163		677	0.01419
673	0.01352		668	0.00521		668	0.01139		678	0.01412
674	0.0124		669	0.00616		669	0.01182		679	0.01397
675	0.01277		670	0.00709		670	0.01106		680	0.01376
676	0.0118		671	0.00665		671	0.01087		681	0.01348
677	0.01223		672	0.00448		672	0.01012		682	0.0136
678	0.01031		673	0.00957		673	0.00991		683	0.01327
679	0.0112		674	0.01219		674	0.00953		684	0.01286
680	0.01164		675	0.01356		675	0.0098		685	0.01292
681	0.01162		676	0.01462		676	0.00965		686	0.01249
682	0.01115		677	0.01537		677	0.0089		687	0.01256
683	0.01208		678	0.01581		678	0.00966		688	0.0121
684	0.01337		679	0.0149		679	0.00958		689	0.01159
685	0.01317		680	0.0153		680	0.00888		690	0.01102
686	0.01365		681	0.01422		681	0.00879		691	0.01039
687	0.01233		682	0.01237		682	0.00912		692	0.01029
688	0.01261		683	0.01341		683	0.00843		693	0.00966
689	0.01398		684	0.01389		684	0.00834		694	0.0103
690	0.01488		685	0.01273		685	0.00761		695	0.00981
691	0.01531		686	0.01269		686	0.0069		696	0.01078
692	0.01528		687	0.01201		687	0.00736		697	0.01047
693	0.01478		688	0.01072		688	0.00725		698	0.00945
694	0.01381		689	0.01535		689	0.00734		699	0.00852
695	0.01416		690	0.01554		690	0.00791		700	0.00923
696	0.013		691	0.01534		691	0.00847		701	0.0092
697	0.01319		692	0.01475		692	0.00877		702	0.00844
698	0.01196		693	0.01576		693	0.00961		703	0.00848
699	0.01365		694	0.01523		694	0.00988		704	0.00925
700	0.0131		695	0.01438		695	0.01008		705	0.00934
701	0.01232		696	0.01213		696	0.01021		706	0.0094
702	0.01133		697	0.01126		697	0.00963		707	0.00941
703	0.01012		698	0.01		698	0.01133		708	0.00769
704	0.00869		699	0.00723		699	0.01168		709	0.00784
705	0.00703		700	0.00643		700	0.01197		710	0.00837
706	0.00516		701	0.00594		701	0.01219		711	0.00792
707	0.00463		702	0.00682		702	0.01235		712	0.00853
708	0.00594		703	0.00964		703	0.01245		713	0.00818
709	0.0069		704	0.00887		704	0.01248		714	0.00885
710	0.0069		705	0.00969		705	0.01245		715	0.0085
711	0.0069		706	0.01192		706	0.0109		716	0.00986
712	0.0069		707	0.01282		707	0.01105		717	0.01062
713	0.00564		708	0.01344		708	0.01028		718	0.0113
714	0.00634		709	0.01251		709	0.01046		719	0.01191
715	0.00696		710	0.01332		710	0.01132		720	0.0131
716	0.00617		711	0.01244		711	0.01147		721	0.01367
717	0.00603		712	0.01331		712	0.01131		722	0.01418
718	0.00786		713	0.01376		713	0.01162		723	0.01461
719	0.00945		714	0.01378		714	0.01185		724	0.01497
720	0.01082		715	0.01197		715	0.012		725	0.01593
721	0.01195		716	0.01195		716	0.01112		726	0.01508
722	0.01285		717	0.0117		717	0.01131		727	0.01623
723	0.01352		718	0.0107		718	0.01141		728	0.01679
724	0.01396		719	0.01154		719	0.01041		729	0.01728
725	0.01416		720	0.01362		720	0.01055		730	0.01769
726	0.01414		721	0.01582		721	0.01123		731	0.01672
727	0.01388		722	0.01475		722	0.01129		732	0.01597
728	0.01339		723	0.01579		723	0.01188		733	0.0167
729	0.01267		724	0.01624		724	0.01187		734	0.01589
730	0.01172		725	0.01804		725	0.01241		735	0.01673
731	0.01054		726	0.01814		726	0.0124		736	0.01704
732	0.00913		727	0.01773		727	0.01237		737	0.01735
733	0.00749		728	0.01681		728	0.01234		738	0.01766
734	0.00763		729	0.01538		729	0.0123		739	0.01796
735	0.00637		730	0.01552		730	0.01225		740	0.01825
736	0.00495		731	0.0121		731	0.01218		741	0.01854
737	0.00554		732	0.01327		732	0.01211		742	0.01883
738	0.0069		733	0.01264		733	0.01203		743	0.01911
739	0.00484		734	0.01155		734	0.01194		744	0.01939
740	0.00598		735	0.00999		735	0.01184		745	0.01966
741	0.007		736	0.01027		736	0.01174		746	0.01992
742	0.0079		737	0.00654		737	0.01162		747	0.02019
743	0.00868		738	0.00824		738	0.01149		748	0.02045
744	0.00934		739	0.01049		739	0.01135		749	0.0207
745	0.00988		740	0.00862		740	0.01121		750	0.02095
746	0.0103		741	0.00995		741	0.01105		751	0.02119
747	0.0106		742	0.01081		742	0.01089		752	0.02143
748	0.01078		743	0.01388		743	0.01071		753	0.02167
749	0.01084		744	0.01493		744	0.01053		754	0.0219
750	0.00827		745	0.0156		745	0.01033		755	0.02212
751	0.0069		746	0.01591		746	0.01013		756	0.02234
752	0.00929		747	0.01325		747	0.00992		757	0.02256
753	0.00861		748	0.01426		748	0.0097		758	0.02277
754	0.01163		749	0.01474		749	0.00947		759	0.02298
755	0.01407		750	0.01471		750	0.00923		760	0.02318
756	0.01594		751	0
757	0.01724		752	0.00976
758	0.01797		753	0.01644
759	0.01812		754	0.02187
760	0.02101		755	0.02306
761	0.0214		756	0.02768
762	0.02133		757	0.03089
763	0.02082		758	0.03624
764	0.01655		759	0.03809
765	0.01696		760	0.03522
766	0.00624		761	0.04008
767	0.01119		762	0.0413
768	0.01487		763	0.04117
769	0.0173		764	0.03969
770	0.01847		765	0.03685
771	0.02244		766	0.02878
772	0.02318		767	0.02538
773	0.02624		768	0.02458
774	0.03238		769	0.01975
775	0.03486		770	0.0135
776	0.03631		771	0.00581
777	0.03673		772	0.01953
778	0.03612		773	0.0185
779	0.03449		774	0.01687
780	0.03184		775	0.01464
781	0.02816		776	0.01665
782	0.02345		777	0.01523
783	0.01771		778	0.00871
784	0.00631		779	0.00904
785	0.00162		780	0.00866
786	0		781	0.01313
787	0.01392		782	0.01367
788	0.01658		783	0.0137
789	0.01847		784	0.01324
790	0.01959		785	0.01227
791	0.01984		786	0.01081
792	0.02001		787	0.00966
793	0.02011		788	0.01281
794	0.02012		789	0.01537
795	0.02006		790	0.01734
796	0.01992		791	0.01793
797	0.0197		792	0.01839
798	0.0194		793	0.01871
799	0.01903		794	0.0189
800	0.01857		795	0.01895
			796	0.01886
			797	0.01863
			798	0.01827
			799	0.01777
			800	0.01713

## Sheet: Fig. 3d
Lifetime
	77K			77K			298K			298K
Ex=390 nm	Em=482		Ex=390 nm	Em=497		Ex=390 nm	Em=450		Ex=390 nm	Em=462
	1 wt.%			10 wt.%			1 wt.%			10 wt.%
Start	0		Start	0		Start	0		Start	0
Stop	7992000000		Stop	7992000000		Stop	999000000		Stop	399600000
Step	8000000		Step	8000000		Step	1000000		Step	400000
Fixed/Offset			Fixed/Offset			Fixed/Offset			Fixed/Offset
XAxis	Time(ns)		XAxis	Time(ns)		XAxis	Time(ns)		XAxis	Time(ns)
YAxis	Counts		YAxis	Counts		YAxis	Counts		YAxis	Counts
--	--		--	--		--	--		--	--
0	5096		0	5066		0	5027		0	5012
8000000	3630		8000000	3474		1000000	3776		400000	3408
16000000	3608		16000000	3338		2000000	3327		800000	2772
24000000	3419		24000000	3106		3000000	2943		1200000	2453
32000000	3469		32000000	3134		4000000	2590		1600000	2139
40000000	3536		40000000	3176		5000000	2481		2000000	1964
48000000	3311		48000000	3148		6000000	2270		2400000	1805
56000000	3278		56000000	3041		7000000	2131		2800000	1611
64000000	3229		64000000	3037		8000000	2008		3200000	1538
72000000	3273		72000000	2935		9000000	1755		3600000	1513
80000000	3210		80000000	2917		10000000	1725		4000000	1346
88000000	3166		88000000	2791		11000000	1599		4400000	1292
96000000	3119		96000000	2768		12000000	1586		4800000	1221
104000000	3221		104000000	2875		13000000	1458		5200000	1147
112000000	3166		112000000	2765		14000000	1390		5600000	1098
120000000	3040		120000000	2645		15000000	1310		6000000	1105
128000000	3137		128000000	2655		16000000	1273		6400000	1080
136000000	2949		136000000	2584		17000000	1279		6800000	953
144000000	2962		144000000	2668		18000000	1145		7200000	905
152000000	2933		152000000	2588		19000000	1136		7600000	848
160000000	2969		160000000	2616		20000000	1053		8000000	884
168000000	2856		168000000	2580		21000000	1017		8400000	798
176000000	2826		176000000	2425		22000000	987		8800000	763
184000000	2924		184000000	2540		23000000	972		9200000	710
192000000	2741		192000000	2475		24000000	924		9600000	740
200000000	2827		200000000	2391		25000000	912		10000000	758
208000000	2817		208000000	2392		26000000	907		10400000	703
216000000	2683		216000000	2382		27000000	854		10800000	663
224000000	2686		224000000	2381		28000000	794		11200000	652
232000000	2813		232000000	2225		29000000	787		11600000	632
240000000	2686		240000000	2245		30000000	719		12000000	603
248000000	2716		248000000	2216		31000000	754		12400000	531
256000000	2579		256000000	2266		32000000	735		12800000	528
264000000	2623		264000000	2128		33000000	727		13200000	524
272000000	2516		272000000	2222		34000000	656		13600000	527
280000000	2482		280000000	2097		35000000	692		14000000	518
288000000	2508		288000000	2166		36000000	615		14400000	540
296000000	2553		296000000	2149		37000000	569		14800000	496
304000000	2531		304000000	2042		38000000	571		15200000	501
312000000	2427		312000000	2109		39000000	593		15600000	485
320000000	2443		320000000	2086		40000000	531		16000000	446
328000000	2352		328000000	2064		41000000	532		16400000	457
336000000	2394		336000000	2008		42000000	556		16800000	429
344000000	2269		344000000	2124		43000000	502		17200000	452
352000000	2338		352000000	1957		44000000	522		17600000	452
360000000	2320		360000000	1877		45000000	465		18000000	418
368000000	2297		368000000	1923		46000000	511		18400000	407
376000000	2312		376000000	1834		47000000	476		18800000	409
384000000	2233		384000000	1806		48000000	448		19200000	367
392000000	2181		392000000	1857		49000000	456		19600000	356
400000000	2194		400000000	1805		50000000	439		20000000	332
408000000	2205		408000000	1808		51000000	445		20400000	371
416000000	2153		416000000	1786		52000000	423		20800000	343
424000000	2051		424000000	1738		53000000	381		21200000	346
432000000	2100		432000000	1781		54000000	434		21600000	326
440000000	2031		440000000	1825		55000000	364		22000000	322
448000000	2071		448000000	1650		56000000	380		22400000	282
456000000	2110		456000000	1657		57000000	381		22800000	302
464000000	2066		464000000	1704		58000000	382		23200000	313
472000000	2013		472000000	1680		59000000	361		23600000	299
480000000	2006		480000000	1719		60000000	374		24000000	288
488000000	1946		488000000	1650		61000000	352		24400000	254
496000000	1983		496000000	1586		62000000	336		24800000	261
504000000	1926		504000000	1600		63000000	371		25200000	286
512000000	1883		512000000	1543		64000000	332		25600000	290
520000000	1885		520000000	1578		65000000	327		26000000	247
528000000	1885		528000000	1548		66000000	350		26400000	258
536000000	1913		536000000	1568		67000000	279		26800000	265
544000000	1875		544000000	1513		68000000	297		27200000	254
552000000	1826		552000000	1526		69000000	333		27600000	254
560000000	1817		560000000	1482		70000000	307		28000000	268
568000000	1818		568000000	1460		71000000	288		28400000	242
576000000	1809		576000000	1437		72000000	263		28800000	238
584000000	1827		584000000	1442		73000000	252		29200000	277
592000000	1777		592000000	1449		74000000	271		29600000	240
600000000	1772		600000000	1431		75000000	284		30000000	226
608000000	1753		608000000	1420		76000000	269		30400000	230
616000000	1760		616000000	1418		77000000	265		30800000	244
624000000	1659		624000000	1398		78000000	264		31200000	211
632000000	1732		632000000	1343		79000000	285		31600000	189
640000000	1622		640000000	1398		80000000	249		32000000	210
648000000	1715		648000000	1329		81000000	262		32400000	214
656000000	1652		656000000	1399		82000000	231		32800000	203
664000000	1724		664000000	1331		83000000	225		33200000	183
672000000	1577		672000000	1249		84000000	206		33600000	191
680000000	1574		680000000	1310		85000000	228		34000000	168
688000000	1593		688000000	1335		86000000	196		34400000	189
696000000	1611		696000000	1279		87000000	221		34800000	176
704000000	1622		704000000	1236		88000000	226		35200000	166
712000000	1550		712000000	1270		89000000	199		35600000	198
720000000	1587		720000000	1241		90000000	200		36000000	187
728000000	1472		728000000	1229		91000000	201		36400000	189
736000000	1544		736000000	1200		92000000	233		36800000	183
744000000	1557		744000000	1201		93000000	224		37200000	158
752000000	1437		752000000	1160		94000000	211		37600000	162
760000000	1522		760000000	1264		95000000	184		38000000	176
768000000	1466		768000000	1246		96000000	188		38400000	155
776000000	1397		776000000	1139		97000000	179		38800000	177
784000000	1447		784000000	1139		98000000	160		39200000	151
792000000	1452		792000000	1108		99000000	199		39600000	148
800000000	1416		800000000	1126		100000000	180		40000000	128
808000000	1432		808000000	1146		101000000	198		40400000	134
816000000	1407		816000000	1144		102000000	174		40800000	129
824000000	1308		824000000	1147		103000000	164		41200000	153
832000000	1396		832000000	1069		104000000	190		41600000	130
840000000	1408		840000000	1067		105000000	163		42000000	133
848000000	1346		848000000	1050		106000000	169		42400000	142
856000000	1333		856000000	1037		107000000	138		42800000	147
864000000	1360		864000000	1020		108000000	162		43200000	120
872000000	1313		872000000	1037		109000000	152		43600000	130
880000000	1290		880000000	1008		110000000	154		44000000	118
888000000	1265		888000000	1017		111000000	159		44400000	141
896000000	1325		896000000	1017		112000000	149		44800000	128
904000000	1237		904000000	978		113000000	152		45200000	146
912000000	1345		912000000	952		114000000	127		45600000	132
920000000	1234		920000000	948		115000000	158		46000000	116
928000000	1298		928000000	1007		116000000	147		46400000	134
936000000	1262		936000000	969		117000000	121		46800000	135
944000000	1227		944000000	897		118000000	139		47200000	116
952000000	1156		952000000	885		119000000	146		47600000	117
960000000	1201		960000000	913		120000000	154		48000000	138
968000000	1166		968000000	889		121000000	115		48400000	101
976000000	1181		976000000	916		122000000	156		48800000	124
984000000	1157		984000000	905		123000000	115		49200000	112
992000000	1211		992000000	857		124000000	118		49600000	118
1000000000	1164		1000000000	880		125000000	130		50000000	89
1008000000	1125		1008000000	895		126000000	123		50400000	102
1016000000	1161		1016000000	899		127000000	147		50800000	111
1024000000	1180		1024000000	837		128000000	110		51200000	118
1032000000	1176		1032000000	876		129000000	106		51600000	92
1040000000	1064		1040000000	815		130000000	128		52000000	91
1048000000	1126		1048000000	852		131000000	97		52400000	100
1056000000	1143		1056000000	842		132000000	124		52800000	116
1064000000	1095		1064000000	859		133000000	123		53200000	90
1072000000	1047		1072000000	779		134000000	102		53600000	111
1080000000	1018		1080000000	799		135000000	84		54000000	101
1088000000	1067		1088000000	835		136000000	112		54400000	86
1096000000	1026		1096000000	839		137000000	99		54800000	90
1104000000	1066		1104000000	799		138000000	123		55200000	100
1112000000	1044		1112000000	766		139000000	94		55600000	98
1120000000	997		1120000000	768		140000000	79		56000000	88
1128000000	941		1128000000	754		141000000	108		56400000	89
1136000000	1001		1136000000	744		142000000	98		56800000	90
1144000000	1013		1144000000	783		143000000	113		57200000	101
1152000000	968		1152000000	798		144000000	105		57600000	78
1160000000	957		1160000000	730		145000000	91		58000000	91
1168000000	895		1168000000	735		146000000	86		58400000	99
1176000000	981		1176000000	696		147000000	98		58800000	83
1184000000	929		1184000000	667		148000000	88		59200000	75
1192000000	905		1192000000	670		149000000	74		59600000	80
1200000000	900		1200000000	719		150000000	102		60000000	82
1208000000	910		1208000000	724		151000000	105		60400000	85
1216000000	928		1216000000	708		152000000	78		60800000	93
1224000000	880		1224000000	698		153000000	88		61200000	81
1232000000	883		1232000000	680		154000000	93		61600000	71
1240000000	928		1240000000	667		155000000	90		62000000	72
1248000000	826		1248000000	636		156000000	91		62400000	77
1256000000	917		1256000000	640		157000000	89		62800000	75
1264000000	853		1264000000	689		158000000	60		63200000	97
1272000000	881		1272000000	638		159000000	71		63600000	72
1280000000	884		1280000000	627		160000000	79		64000000	66
1288000000	840		1288000000	597		161000000	80		64400000	76
1296000000	816		1296000000	645		162000000	73		64800000	61
1304000000	835		1304000000	654		163000000	70		65200000	64
1312000000	826		1312000000	619		164000000	81		65600000	76
1320000000	798		1320000000	600		165000000	51		66000000	65
1328000000	880		1328000000	578		166000000	74		66400000	79
1336000000	842		1336000000	570		167000000	79		66800000	77
1344000000	865		1344000000	603		168000000	76		67200000	67
1352000000	775		1352000000	575		169000000	78		67600000	74
1360000000	752		1360000000	575		170000000	82		68000000	58
1368000000	768		1368000000	568		171000000	82		68400000	71
1376000000	731		1376000000	516		172000000	71		68800000	53
1384000000	779		1384000000	560		173000000	65		69200000	58
1392000000	763		1392000000	539		174000000	76		69600000	65
1400000000	742		1400000000	552		175000000	64		70000000	62
1408000000	750		1408000000	563		176000000	71		70400000	72
1416000000	717		1416000000	537		177000000	75		70800000	78
1424000000	752		1424000000	558		178000000	56		71200000	64
1432000000	698		1432000000	513		179000000	69		71600000	59
1440000000	716		1440000000	519		180000000	67		72000000	62
1448000000	688		1448000000	533		181000000	55		72400000	52
1456000000	725		1456000000	520		182000000	63		72800000	52
1464000000	685		1464000000	537		183000000	58		73200000	63
1472000000	661		1472000000	525		184000000	42		73600000	50
1480000000	664		1480000000	493		185000000	64		74000000	58
1488000000	646		1488000000	504		186000000	66		74400000	43
1496000000	696		1496000000	498		187000000	59		74800000	58
1504000000	636		1504000000	513		188000000	59		75200000	61
1512000000	684		1512000000	496		189000000	63		75600000	44
1520000000	663		1520000000	502		190000000	60		76000000	67
1528000000	639		1528000000	440		191000000	62		76400000	52
1536000000	679		1536000000	486		192000000	52		76800000	53
1544000000	621		1544000000	483		193000000	42		77200000	58
1552000000	633		1552000000	480		194000000	49		77600000	47
1560000000	637		1560000000	463		195000000	47		78000000	53
1568000000	600		1568000000	471		196000000	54		78400000	40
1576000000	638		1576000000	462		197000000	45		78800000	64
1584000000	643		1584000000	480		198000000	50		79200000	49
1592000000	665		1592000000	446		199000000	56		79600000	53
1600000000	650		1600000000	451		200000000	42		80000000	37
1608000000	607		1608000000	467		201000000	48		80400000	51
1616000000	618		1616000000	456		202000000	58		80800000	46
1624000000	617		1624000000	434		203000000	54		81200000	48
1632000000	612		1632000000	388		204000000	49		81600000	50
1640000000	622		1640000000	414		205000000	45		82000000	50
1648000000	611		1648000000	428		206000000	59		82400000	54
1656000000	544		1656000000	436		207000000	56		82800000	42
1664000000	573		1664000000	388		208000000	53		83200000	35
1672000000	548		1672000000	444		209000000	49		83600000	51
1680000000	543		1680000000	413		210000000	35		84000000	49
1688000000	579		1688000000	429		211000000	58		84400000	35
1696000000	561		1696000000	414		212000000	51		84800000	43
1704000000	541		1704000000	382		213000000	55		85200000	30
1712000000	511		1712000000	381		214000000	47		85600000	39
1720000000	559		1720000000	348		215000000	36		86000000	36
1728000000	553		1728000000	351		216000000	45		86400000	43
1736000000	544		1736000000	367		217000000	43		86800000	32
1744000000	527		1744000000	385		218000000	54		87200000	50
1752000000	566		1752000000	390		219000000	39		87600000	50
1760000000	485		1760000000	379		220000000	32		88000000	56
1768000000	540		1768000000	390		221000000	43		88400000	35
1776000000	501		1776000000	370		222000000	35		88800000	49
1784000000	501		1784000000	369		223000000	34		89200000	38
1792000000	509		1792000000	335		224000000	42		89600000	34
1800000000	472		1800000000	353		225000000	40		90000000	36
1808000000	494		1808000000	357		226000000	53		90400000	34
1816000000	478		1816000000	323		227000000	43		90800000	38
1824000000	553		1824000000	355		228000000	31		91200000	37
1832000000	505		1832000000	305		229000000	46		91600000	48
1840000000	467		1840000000	307		230000000	35		92000000	38
1848000000	498		1848000000	363		231000000	36		92400000	37
1856000000	450		1856000000	310		232000000	34		92800000	45
1864000000	454		1864000000	298		233000000	31		93200000	49
1872000000	495		1872000000	314		234000000	43		93600000	46
1880000000	425		1880000000	316		235000000	28		94000000	33
1888000000	430		1888000000	321		236000000	42		94400000	41
1896000000	474		1896000000	292		237000000	30		94800000	40
1904000000	464		1904000000	347		238000000	48		95200000	37
1912000000	442		1912000000	325		239000000	43		95600000	35
1920000000	475		1920000000	312		240000000	30		96000000	34
1928000000	466		1928000000	308		241000000	35		96400000	32
1936000000	472		1936000000	263		242000000	33		96800000	43
1944000000	389		1944000000	299		243000000	26		97200000	31
1952000000	412		1952000000	330		244000000	31		97600000	40
1960000000	448		1960000000	283		245000000	29		98000000	22
1968000000	415		1968000000	304		246000000	34		98400000	31
1976000000	448		1976000000	301		247000000	29		98800000	31
1984000000	393		1984000000	274		248000000	28		99200000	32
1992000000	402		1992000000	279		249000000	42		99600000	26
2000000000	383		2000000000	274		250000000	44		100000000	31
2008000000	402		2008000000	302		251000000	32		100400000	54
2016000000	423		2016000000	254		252000000	37		100800000	33
2024000000	397		2024000000	267		253000000	43		101200000	27
2032000000	414		2032000000	283		254000000	27		101600000	29
2040000000	383		2040000000	296		255000000	29		102000000	33
2048000000	409		2048000000	266		256000000	30		102400000	38
2056000000	371		2056000000	261		257000000	34		102800000	31
2064000000	406		2064000000	236		258000000	38		103200000	35
2072000000	391		2072000000	245		259000000	41		103600000	37
2080000000	321		2080000000	264		260000000	29		104000000	30
2088000000	381		2088000000	260		261000000	29		104400000	29
2096000000	366		2096000000	253		262000000	31		104800000	30
2104000000	398		2104000000	232		263000000	38		105200000	34
2112000000	355		2112000000	268		264000000	20		105600000	29
2120000000	363		2120000000	265		265000000	30		106000000	31
2128000000	345		2128000000	242		266000000	28		106400000	32
2136000000	392		2136000000	220		267000000	28		106800000	27
2144000000	355		2144000000	248		268000000	31		107200000	29
2152000000	361		2152000000	235		269000000	28		107600000	21
2160000000	375		2160000000	250		270000000	27		108000000	33
2168000000	333		2168000000	252		271000000	20		108400000	31
2176000000	331		2176000000	224		272000000	22		108800000	30
2184000000	319		2184000000	243		273000000	24		109200000	24
2192000000	374		2192000000	245		274000000	22		109600000	41
2200000000	320		2200000000	225		275000000	32		110000000	28
2208000000	313		2208000000	236		276000000	19		110400000	22
2216000000	312		2216000000	211		277000000	23		110800000	18
2224000000	318		2224000000	245		278000000	27		111200000	19
2232000000	311		2232000000	230		279000000	27		111600000	21
2240000000	308		2240000000	223		280000000	20		112000000	30
2248000000	330		2248000000	214		281000000	18		112400000	29
2256000000	338		2256000000	201		282000000	31		112800000	31
2264000000	343		2264000000	207		283000000	27		113200000	30
2272000000	310		2272000000	214		284000000	21		113600000	23
2280000000	347		2280000000	200		285000000	23		114000000	16
2288000000	321		2288000000	213		286000000	24		114400000	27
2296000000	292		2296000000	204		287000000	16		114800000	25
2304000000	291		2304000000	193		288000000	26		115200000	13
2312000000	293		2312000000	211		289000000	21		115600000	11
2320000000	332		2320000000	210		290000000	19		116000000	22
2328000000	266		2328000000	184		291000000	28		116400000	21
2336000000	288		2336000000	187		292000000	27		116800000	24
2344000000	316		2344000000	203		293000000	25		117200000	27
2352000000	282		2352000000	186		294000000	21		117600000	22
2360000000	289		2360000000	201		295000000	22		118000000	18
2368000000	291		2368000000	202		296000000	21		118400000	19
2376000000	296		2376000000	189		297000000	11		118800000	28
2384000000	269		2384000000	169		298000000	20		119200000	17
2392000000	250		2392000000	180		299000000	18		119600000	23
2400000000	270		2400000000	203		300000000	27		120000000	25
2408000000	293		2408000000	166		301000000	13		120400000	24
2416000000	283		2416000000	187		302000000	21		120800000	19
2424000000	305		2424000000	153		303000000	28		121200000	21
2432000000	280		2432000000	195		304000000	26		121600000	16
2440000000	271		2440000000	183		305000000	22		122000000	27
2448000000	253		2448000000	155		306000000	28		122400000	21
2456000000	287		2456000000	185		307000000	18		122800000	25
2464000000	257		2464000000	189		308000000	23		123200000	24
2472000000	261		2472000000	159		309000000	21		123600000	20
2480000000	258		2480000000	193		310000000	21		124000000	22
2488000000	267		2488000000	175		311000000	20		124400000	26
2496000000	260		2496000000	191		312000000	18		124800000	13
2504000000	279		2504000000	137		313000000	20		125200000	15
2512000000	241		2512000000	149		314000000	25		125600000	20
2520000000	255		2520000000	172		315000000	16		126000000	26
2528000000	267		2528000000	190		316000000	18		126400000	21
2536000000	196		2536000000	141		317000000	16		126800000	11
2544000000	216		2544000000	164		318000000	30		127200000	12
2552000000	208		2552000000	146		319000000	23		127600000	27
2560000000	226		2560000000	142		320000000	19		128000000	17
2568000000	221		2568000000	150		321000000	13		128400000	18
2576000000	235		2576000000	119		322000000	16		128800000	13
2584000000	235		2584000000	174		323000000	8		129200000	23
2592000000	237		2592000000	151		324000000	18		129600000	19
2600000000	239		2600000000	169		325000000	24		130000000	14
2608000000	217		2608000000	142		326000000	25		130400000	22
2616000000	253		2616000000	146		327000000	18		130800000	14
2624000000	239		2624000000	143		328000000	11		131200000	23
2632000000	206		2632000000	138		329000000	9		131600000	29
2640000000	209		2640000000	153		330000000	18		132000000	18
2648000000	225		2648000000	130		331000000	24		132400000	24
2656000000	190		2656000000	149		332000000	9		132800000	14
2664000000	204		2664000000	130		333000000	16		133200000	18
2672000000	198		2672000000	124		334000000	20		133600000	18
2680000000	206		2680000000	141		335000000	26		134000000	13
2688000000	207		2688000000	137		336000000	16		134400000	23
2696000000	219		2696000000	128		337000000	14		134800000	16
2704000000	198		2704000000	131		338000000	14		135200000	17
2712000000	201		2712000000	123		339000000	14		135600000	14
2720000000	207		2720000000	127		340000000	10		136000000	12
2728000000	199		2728000000	118		341000000	17		136400000	12
2736000000	237		2736000000	127		342000000	19		136800000	18
2744000000	195		2744000000	124		343000000	16		137200000	13
2752000000	169		2752000000	131		344000000	17		137600000	17
2760000000	208		2760000000	103		345000000	15		138000000	20
2768000000	211		2768000000	118		346000000	20		138400000	14
2776000000	193		2776000000	145		347000000	19		138800000	16
2784000000	192		2784000000	129		348000000	15		139200000	23
2792000000	204		2792000000	96		349000000	20		139600000	11
2800000000	228		2800000000	124		350000000	8		140000000	8
2808000000	171		2808000000	137		351000000	17		140400000	14
2816000000	171		2816000000	121		352000000	12		140800000	9
2824000000	170		2824000000	124		353000000	16		141200000	26
2832000000	185		2832000000	118		354000000	17		141600000	14
2840000000	199		2840000000	108		355000000	14		142000000	12
2848000000	194		2848000000	115		356000000	22		142400000	17
2856000000	192		2856000000	125		357000000	10		142800000	13
2864000000	163		2864000000	109		358000000	14		143200000	21
2872000000	180		2872000000	102		359000000	12		143600000	20
2880000000	189		2880000000	115		360000000	21		144000000	16
2888000000	173		2888000000	109		361000000	18		144400000	18
2896000000	164		2896000000	119		362000000	15		144800000	11
2904000000	181		2904000000	96		363000000	13		145200000	18
2912000000	171		2912000000	122		364000000	9		145600000	10
2920000000	171		2920000000	89		365000000	23		146000000	10
2928000000	160		2928000000	102		366000000	10		146400000	9
2936000000	171		2936000000	81		367000000	13		146800000	15
2944000000	167		2944000000	99		368000000	11		147200000	16
2952000000	157		2952000000	103		369000000	15		147600000	16
2960000000	142		2960000000	100		370000000	16		148000000	14
2968000000	158		2968000000	104		371000000	16		148400000	13
2976000000	134		2976000000	87		372000000	16		148800000	16
2984000000	152		2984000000	93		373000000	10		149200000	13
2992000000	122		2992000000	114		374000000	12		149600000	14
3000000000	169		3000000000	90		375000000	14		150000000	11
3008000000	155		3008000000	101		376000000	14		150400000	18
3016000000	154		3016000000	77		377000000	9		150800000	15
3024000000	156		3024000000	91		378000000	14		151200000	16
3032000000	155		3032000000	88		379000000	12		151600000	8
3040000000	144		3040000000	80		380000000	14		152000000	11
3048000000	139		3048000000	90		381000000	10		152400000	11
3056000000	143		3056000000	100		382000000	11		152800000	9
3064000000	133		3064000000	87		383000000	11		153200000	9
3072000000	140		3072000000	96		384000000	11		153600000	8
3080000000	142		3080000000	95		385000000	16		154000000	15
3088000000	135		3088000000	91		386000000	12		154400000	14
3096000000	141		3096000000	93		387000000	11		154800000	17
3104000000	153		3104000000	78		388000000	19		155200000	11
3112000000	141		3112000000	89		389000000	13		155600000	11
3120000000	134		3120000000	84		390000000	8		156000000	17
3128000000	142		3128000000	80		391000000	12		156400000	11
3136000000	155		3136000000	91		392000000	18		156800000	15
3144000000	105		3144000000	105		393000000	22		157200000	7
3152000000	120		3152000000	75		394000000	11		157600000	11
3160000000	123		3160000000	71		395000000	7		158000000	11
3168000000	139		3168000000	91		396000000	17		158400000	13
3176000000	140		3176000000	59		397000000	5		158800000	11
3184000000	124		3184000000	72		398000000	7		159200000	10
3192000000	147		3192000000	93		399000000	14		159600000	10
3200000000	108		3200000000	72		400000000	6		160000000	5
3208000000	140		3208000000	90		401000000	11		160400000	11
3216000000	114		3216000000	85		402000000	10		160800000	6
3224000000	122		3224000000	72		403000000	11		161200000	10
3232000000	124		3232000000	65		404000000	17		161600000	11
3240000000	136		3240000000	66		405000000	13		162000000	13
3248000000	130		3248000000	66		406000000	13		162400000	14
3256000000	114		3256000000	81		407000000	8		162800000	10
3264000000	102		3264000000	84		408000000	9		163200000	9
3272000000	117		3272000000	68		409000000	10		163600000	8
3280000000	120		3280000000	79		410000000	6		164000000	15
3288000000	136		3288000000	85		411000000	10		164400000	6
3296000000	112		3296000000	77		412000000	9		164800000	9
3304000000	113		3304000000	69		413000000	10		165200000	9
3312000000	123		3312000000	72		414000000	8		165600000	14
3320000000	126		3320000000	70		415000000	9		166000000	8
3328000000	120		3328000000	64		416000000	4		166400000	5
3336000000	121		3336000000	60		417000000	8		166800000	12
3344000000	114		3344000000	77		418000000	10		167200000	13
3352000000	111		3352000000	58		419000000	10		167600000	11
3360000000	120		3360000000	58		420000000	4		168000000	9
3368000000	116		3368000000	76		421000000	6		168400000	15
3376000000	126		3376000000	60		422000000	6		168800000	11
3384000000	105		3384000000	73		423000000	12		169200000	6
3392000000	123		3392000000	67		424000000	9		169600000	10
3400000000	110		3400000000	81		425000000	9		170000000	7
3408000000	103		3408000000	60		426000000	5		170400000	10
3416000000	99		3416000000	74		427000000	9		170800000	12
3424000000	110		3424000000	55		428000000	7		171200000	8
3432000000	116		3432000000	69		429000000	4		171600000	9
3440000000	106		3440000000	70		430000000	9		172000000	10
3448000000	89		3448000000	65		431000000	7		172400000	9
3456000000	103		3456000000	61		432000000	4		172800000	5
3464000000	107		3464000000	67		433000000	13		173200000	17
3472000000	87		3472000000	67		434000000	9		173600000	5
3480000000	97		3480000000	62		435000000	10		174000000	9
3488000000	95		3488000000	65		436000000	6		174400000	11
3496000000	122		3496000000	64		437000000	13		174800000	12
3504000000	86		3504000000	54		438000000	11		175200000	12
3512000000	110		3512000000	63		439000000	3		175600000	15
3520000000	81		3520000000	66		440000000	5		176000000	7
3528000000	88		3528000000	55		441000000	7		176400000	3
3536000000	81		3536000000	54		442000000	11		176800000	14
3544000000	95		3544000000	56		443000000	7		177200000	9
3552000000	104		3552000000	64		444000000	8		177600000	11
3560000000	103		3560000000	35		445000000	6		178000000	11
3568000000	93		3568000000	59		446000000	10		178400000	9
3576000000	94		3576000000	45		447000000	4		178800000	6
3584000000	93		3584000000	52		448000000	10		179200000	5
3592000000	83		3592000000	40		449000000	9		179600000	3
3600000000	94		3600000000	55		450000000	14		180000000	10
3608000000	83		3608000000	47		451000000	5		180400000	8
3616000000	88		3616000000	48		452000000	8		180800000	10
3624000000	79		3624000000	59		453000000	10		181200000	8
3632000000	95		3632000000	52		454000000	3		181600000	4
3640000000	106		3640000000	56		455000000	6		182000000	8
3648000000	88		3648000000	56		456000000	5		182400000	4
3656000000	88		3656000000	41		457000000	11		182800000	8
3664000000	73		3664000000	57		458000000	7		183200000	4
3672000000	85		3672000000	39		459000000	8		183600000	6
3680000000	79		3680000000	52		460000000	9		184000000	9
3688000000	81		3688000000	44		461000000	3		184400000	8
3696000000	84		3696000000	50		462000000	9		184800000	3
3704000000	94		3704000000	38		463000000	3		185200000	2
3712000000	72		3712000000	49		464000000	9		185600000	6
3720000000	79		3720000000	38		465000000	6		186000000	10
3728000000	79		3728000000	47		466000000	6		186400000	12
3736000000	59		3736000000	50		467000000	4		186800000	7
3744000000	60		3744000000	56		468000000	3		187200000	5
3752000000	81		3752000000	50		469000000	3		187600000	12
3760000000	68		3760000000	54		470000000	2		188000000	8
3768000000	74		3768000000	43		471000000	2		188400000	2
3776000000	76		3776000000	40		472000000	8		188800000	6
3784000000	64		3784000000	45		473000000	4		189200000	13
3792000000	78		3792000000	45		474000000	3		189600000	7
3800000000	83		3800000000	42		475000000	10		190000000	8
3808000000	75		3808000000	51		476000000	8		190400000	9
3816000000	80		3816000000	47		477000000	7		190800000	4
3824000000	61		3824000000	36		478000000	9		191200000	5
3832000000	85		3832000000	53		479000000	5		191600000	6
3840000000	59		3840000000	51		480000000	8		192000000	8
3848000000	62		3848000000	43		481000000	7		192400000	5
3856000000	68		3856000000	40		482000000	4		192800000	3
3864000000	73		3864000000	41		483000000	7		193200000	9
3872000000	72		3872000000	38		484000000	5		193600000	6
3880000000	62		3880000000	36		485000000	4		194000000	5
3888000000	86		3888000000	30		486000000	5		194400000	7
3896000000	69		3896000000	34		487000000	5		194800000	5
3904000000	86		3904000000	32		488000000	7		195200000	6
3912000000	56		3912000000	39		489000000	8		195600000	7
3920000000	65		3920000000	31		490000000	7		196000000	2
3928000000	50		3928000000	50		491000000	5		196400000	2
3936000000	62		3936000000	51		492000000	11		196800000	5
3944000000	66		3944000000	29		493000000	6		197200000	10
3952000000	54		3952000000	42		494000000	2		197600000	5
3960000000	52		3960000000	39		495000000	4		198000000	8
3968000000	54		3968000000	60		496000000	7		198400000	5
3976000000	77		3976000000	33		497000000	13		198800000	5
3984000000	47		3984000000	40		498000000	7		199200000	6
3992000000	52		3992000000	36		499000000	8		199600000	5
4000000000	52		4000000000	30		500000000	8		200000000	4
4008000000	54		4008000000	37		501000000	6		200400000	4
4016000000	68		4016000000	36		502000000	4		200800000	5
4024000000	55		4024000000	40		503000000	3		201200000	3
4032000000	54		4032000000	51		504000000	5		201600000	2
4040000000	47		4040000000	29		505000000	8		202000000	5
4048000000	57		4048000000	32		506000000	4		202400000	4
4056000000	59		4056000000	27		507000000	0		202800000	9
4064000000	52		4064000000	36		508000000	6		203200000	3
4072000000	57		4072000000	26		509000000	7		203600000	7
4080000000	47		4080000000	37		510000000	9		204000000	9
4088000000	66		4088000000	29		511000000	6		204400000	8
4096000000	53		4096000000	18		512000000	5		204800000	3
4104000000	63		4104000000	39		513000000	9		205200000	6
4112000000	53		4112000000	37		514000000	3		205600000	9
4120000000	47		4120000000	35		515000000	6		206000000	6
4128000000	44		4128000000	30		516000000	6		206400000	4
4136000000	52		4136000000	33		517000000	8		206800000	4
4144000000	53		4144000000	31		518000000	6		207200000	5
4152000000	54		4152000000	23		519000000	10		207600000	8
4160000000	56		4160000000	26		520000000	6		208000000	8
4168000000	55		4168000000	35		521000000	6		208400000	5
4176000000	61		4176000000	30		522000000	3		208800000	6
4184000000	59		4184000000	26		523000000	5		209200000	7
4192000000	66		4192000000	28		524000000	6		209600000	7
4200000000	68		4200000000	32		525000000	7		210000000	9
4208000000	42		4208000000	36		526000000	2		210400000	7
4216000000	42		4216000000	24		527000000	1		210800000	5
4224000000	47		4224000000	23		528000000	4		211200000	4
4232000000	60		4232000000	21		529000000	2		211600000	10
4240000000	38		4240000000	24		530000000	5		212000000	4
4248000000	56		4248000000	18		531000000	4		212400000	6
4256000000	48		4256000000	30		532000000	4		212800000	6
4264000000	41		4264000000	29		533000000	4		213200000	6
4272000000	44		4272000000	29		534000000	4		213600000	4
4280000000	48		4280000000	29		535000000	6		214000000	4
4288000000	52		4288000000	35		536000000	6		214400000	3
4296000000	44		4296000000	24		537000000	3		214800000	3
4304000000	53		4304000000	21		538000000	5		215200000	4
4312000000	55		4312000000	29		539000000	3		215600000	3
4320000000	46		4320000000	20		540000000	1		216000000	3
4328000000	56		4328000000	35		541000000	3		216400000	9
4336000000	47		4336000000	29		542000000	7		216800000	3
4344000000	46		4344000000	31		543000000	3		217200000	3
4352000000	39		4352000000	21		544000000	2		217600000	3
4360000000	34		4360000000	36		545000000	3		218000000	10
4368000000	50		4368000000	32		546000000	2		218400000	4
4376000000	35		4376000000	19		547000000	5		218800000	6
4384000000	37		4384000000	15		548000000	0		219200000	4
4392000000	38		4392000000	25		549000000	2		219600000	4
4400000000	48		4400000000	26		550000000	8		220000000	5
4408000000	40		4408000000	27		551000000	12		220400000	5
4416000000	53		4416000000	34		552000000	4		220800000	7
4424000000	49		4424000000	26		553000000	9		221200000	11
4432000000	40		4432000000	21		554000000	7		221600000	3
4440000000	52		4440000000	16		555000000	6		222000000	4
4448000000	44		4448000000	30		556000000	4		222400000	3
4456000000	39		4456000000	31		557000000	7		222800000	5
4464000000	40		4464000000	20		558000000	6		223200000	4
4472000000	36		4472000000	26		559000000	4		223600000	4
4480000000	36		4480000000	23		560000000	1		224000000	3
4488000000	46		4488000000	19		561000000	7		224400000	9
4496000000	44		4496000000	23		562000000	1		224800000	2
4504000000	39		4504000000	22		563000000	3		225200000	7
4512000000	30		4512000000	24		564000000	3		225600000	7
4520000000	29		4520000000	22		565000000	3		226000000	3
4528000000	33		4528000000	22		566000000	6		226400000	6
4536000000	33		4536000000	29		567000000	6		226800000	2
4544000000	48		4544000000	26		568000000	2		227200000	6
4552000000	28		4552000000	20		569000000	3		227600000	5
4560000000	38		4560000000	23		570000000	4		228000000	6
4568000000	27		4568000000	18		571000000	2		228400000	3
4576000000	28		4576000000	18		572000000	2		228800000	4
4584000000	36		4584000000	15		573000000	4		229200000	8
4592000000	31		4592000000	26		574000000	1		229600000	3
4600000000	35		4600000000	19		575000000	4		230000000	5
4608000000	43		4608000000	16		576000000	6		230400000	4
4616000000	34		4616000000	23		577000000	3		230800000	5
4624000000	25		4624000000	22		578000000	4		231200000	7
4632000000	32		4632000000	13		579000000	2		231600000	4
4640000000	34		4640000000	22		580000000	7		232000000	7
4648000000	27		4648000000	18		581000000	1		232400000	3
4656000000	32		4656000000	21		582000000	3		232800000	2
4664000000	39		4664000000	16		583000000	3		233200000	4
4672000000	29		4672000000	19		584000000	3		233600000	6
4680000000	39		4680000000	17		585000000	5		234000000	6
4688000000	26		4688000000	19		586000000	3		234400000	3
4696000000	36		4696000000	20		587000000	2		234800000	7
4704000000	39		4704000000	20		588000000	0		235200000	5
4712000000	29		4712000000	24		589000000	5		235600000	3
4720000000	31		4720000000	11		590000000	1		236000000	3
4728000000	30		4728000000	25		591000000	1		236400000	7
4736000000	24		4736000000	20		592000000	2		236800000	6
4744000000	29		4744000000	16		593000000	3		237200000	8
4752000000	40		4752000000	23		594000000	6		237600000	3
4760000000	29		4760000000	17		595000000	6		238000000	6
4768000000	23		4768000000	22		596000000	2		238400000	2
4776000000	35		4776000000	19		597000000	2		238800000	2
4784000000	20		4784000000	17		598000000	1		239200000	4
4792000000	32		4792000000	14		599000000	3		239600000	3
4800000000	34		4800000000	15		600000000	9		240000000	2
4808000000	29		4808000000	13		601000000	5		240400000	2
4816000000	26		4816000000	11		602000000	4		240800000	3
4824000000	37		4824000000	15		603000000	2		241200000	3
4832000000	35		4832000000	9		604000000	4		241600000	2
4840000000	25		4840000000	22		605000000	7		242000000	7
4848000000	28		4848000000	13		606000000	3		242400000	6
4856000000	32		4856000000	15		607000000	3		242800000	5
4864000000	27		4864000000	14		608000000	3		243200000	5
4872000000	42		4872000000	13		609000000	2		243600000	2
4880000000	35		4880000000	14		610000000	4		244000000	2
4888000000	25		4888000000	18		611000000	4		244400000	5
4896000000	21		4896000000	20		612000000	3		244800000	3
4904000000	33		4904000000	18		613000000	5		245200000	2
4912000000	28		4912000000	17		614000000	3		245600000	6
4920000000	31		4920000000	20		615000000	3		246000000	3
4928000000	34		4928000000	21		616000000	3		246400000	1
4936000000	26		4936000000	16		617000000	4		246800000	2
4944000000	21		4944000000	12		618000000	4		247200000	3
4952000000	25		4952000000	7		619000000	3		247600000	6
4960000000	31		4960000000	4		620000000	4		248000000	4
4968000000	30		4968000000	12		621000000	5		248400000	4
4976000000	27		4976000000	16		622000000	2		248800000	5
4984000000	29		4984000000	15		623000000	3		249200000	4
4992000000	15		4992000000	10		624000000	6		249600000	4
5000000000	34		5000000000	15		625000000	1		250000000	4
5008000000	23		5008000000	16		626000000	1		250400000	3
5016000000	28		5016000000	8		627000000	3		250800000	0
5024000000	31		5024000000	21		628000000	2		251200000	4
5032000000	30		5032000000	12		629000000	2		251600000	2
5040000000	20		5040000000	16		630000000	4		252000000	3
5048000000	24		5048000000	17		631000000	0		252400000	4
5056000000	20		5056000000	18		632000000	3		252800000	3
5064000000	25		5064000000	11		633000000	0		253200000	2
5072000000	17		5072000000	15		634000000	0		253600000	4
5080000000	24		5080000000	19		635000000	3		254000000	5
5088000000	24		5088000000	11		636000000	3		254400000	3
5096000000	23		5096000000	11		637000000	3		254800000	3
5104000000	24		5104000000	21		638000000	4		255200000	4
5112000000	20		5112000000	8		639000000	6		255600000	1
5120000000	27		5120000000	5		640000000	1		256000000	3
5128000000	24		5128000000	5		641000000	3		256400000	3
5136000000	14		5136000000	16		642000000	3		256800000	3
5144000000	25		5144000000	11		643000000	2		257200000	2
5152000000	19		5152000000	8		644000000	2		257600000	3
5160000000	30		5160000000	12		645000000	0		258000000	1
5168000000	25		5168000000	8		646000000	3		258400000	2
5176000000	30		5176000000	16		647000000	1		258800000	2
5184000000	23		5184000000	16		648000000	3		259200000	1
5192000000	18		5192000000	13		649000000	2		259600000	4
5200000000	21		5200000000	5		650000000	2		260000000	4
5208000000	21		5208000000	14		651000000	3		260400000	1
5216000000	22		5216000000	13		652000000	1		260800000	3
5224000000	19		5224000000	13		653000000	1		261200000	4
5232000000	29		5232000000	16		654000000	0		261600000	4
5240000000	16		5240000000	10		655000000	0		262000000	4
5248000000	23		5248000000	8		656000000	0		262400000	2
5256000000	16		5256000000	13		657000000	3		262800000	5
5264000000	29		5264000000	7		658000000	4		263200000	5
5272000000	15		5272000000	12		659000000	5		263600000	4
5280000000	16		5280000000	11		660000000	1		264000000	2
5288000000	24		5288000000	11		661000000	2		264400000	3
5296000000	20		5296000000	15		662000000	3		264800000	1
5304000000	22		5304000000	12		663000000	2		265200000	1
5312000000	23		5312000000	6		664000000	1		265600000	4
5320000000	27		5320000000	7		665000000	4		266000000	3
5328000000	20		5328000000	9		666000000	0		266400000	2
5336000000	19		5336000000	11		667000000	4		266800000	1
5344000000	18		5344000000	8		668000000	3		267200000	2
5352000000	19		5352000000	7		669000000	0		267600000	2
5360000000	23		5360000000	9		670000000	0		268000000	1
5368000000	12		5368000000	15		671000000	4		268400000	2
5376000000	16		5376000000	5		672000000	3		268800000	3
5384000000	14		5384000000	10		673000000	4		269200000	4
5392000000	22		5392000000	13		674000000	3		269600000	5
5400000000	18		5400000000	6		675000000	1		270000000	2
5408000000	14		5408000000	5		676000000	0		270400000	5
5416000000	17		5416000000	13		677000000	3		270800000	5
5424000000	15		5424000000	11		678000000	4		271200000	2
5432000000	23		5432000000	14		679000000	1		271600000	1
5440000000	12		5440000000	11		680000000	2		272000000	3
5448000000	16		5448000000	10		681000000	5		272400000	2
5456000000	17		5456000000	10		682000000	2		272800000	2
5464000000	14		5464000000	8		683000000	2		273200000	1
5472000000	17		5472000000	4		684000000	4		273600000	2
5480000000	22		5480000000	9		685000000	1		274000000	3
5488000000	26		5488000000	7		686000000	0		274400000	4
5496000000	18		5496000000	10		687000000	4		274800000	1
5504000000	12		5504000000	9		688000000	1		275200000	3
5512000000	14		5512000000	7		689000000	1		275600000	2
5520000000	19		5520000000	11		690000000	5		276000000	1
5528000000	9		5528000000	10		691000000	2		276400000	2
5536000000	18		5536000000	7		692000000	1		276800000	1
5544000000	18		5544000000	10		693000000	0		277200000	8
5552000000	15		5552000000	14		694000000	4		277600000	2
5560000000	14		5560000000	10		695000000	1		278000000	3
5568000000	13		5568000000	8		696000000	1		278400000	7
5576000000	17		5576000000	4		697000000	3		278800000	2
5584000000	15		5584000000	8		698000000	0		279200000	4
5592000000	18		5592000000	5		699000000	2		279600000	3
5600000000	19		5600000000	13		700000000	2		280000000	2
5608000000	20		5608000000	6		701000000	2		280400000	1
5616000000	11		5616000000	8		702000000	2		280800000	1
5624000000	12		5624000000	9		703000000	3		281200000	2
5632000000	9		5632000000	4		704000000	1		281600000	1
5640000000	16		5640000000	7		705000000	2		282000000	1
5648000000	18		5648000000	8		706000000	2		282400000	1
5656000000	19		5656000000	8		707000000	3		282800000	4
5664000000	15		5664000000	2		708000000	2		283200000	2
5672000000	12		5672000000	6		709000000	1		283600000	6
5680000000	6		5680000000	7		710000000	1		284000000	4
5688000000	17		5688000000	8		711000000	0		284400000	3
5696000000	15		5696000000	3		712000000	2		284800000	3
5704000000	15		5704000000	8		713000000	0		285200000	2
5712000000	13		5712000000	9		714000000	4		285600000	0
5720000000	7		5720000000	13		715000000	1		286000000	3
5728000000	17		5728000000	15		716000000	0		286400000	1
5736000000	9		5736000000	8		717000000	5		286800000	2
5744000000	18		5744000000	7		718000000	3		287200000	2
5752000000	17		5752000000	4		719000000	1		287600000	3
5760000000	10		5760000000	10		720000000	0		288000000	2
5768000000	10		5768000000	7		721000000	1		288400000	0
5776000000	10		5776000000	6		722000000	0		288800000	2
5784000000	12		5784000000	9		723000000	0		289200000	0
5792000000	12		5792000000	5		724000000	3		289600000	4
5800000000	19		5800000000	7		725000000	0		290000000	2
5808000000	7		5808000000	3		726000000	2		290400000	2
5816000000	9		5816000000	12		727000000	2		290800000	0
5824000000	9		5824000000	11		728000000	2		291200000	5
5832000000	12		5832000000	4		729000000	4		291600000	3
5840000000	14		5840000000	7		730000000	0		292000000	0
5848000000	14		5848000000	11		731000000	0		292400000	3
5856000000	11		5856000000	6		732000000	1		292800000	1
5864000000	11		5864000000	8		733000000	0		293200000	3
5872000000	7		5872000000	4		734000000	3		293600000	5
5880000000	14		5880000000	10		735000000	4		294000000	5
5888000000	12		5888000000	5		736000000	1		294400000	2
5896000000	11		5896000000	8		737000000	0		294800000	0
5904000000	13		5904000000	5		738000000	1		295200000	1
5912000000	11		5912000000	3		739000000	0		295600000	4
5920000000	13		5920000000	4		740000000	1		296000000	3
5928000000	15		5928000000	7		741000000	4		296400000	1
5936000000	10		5936000000	7		742000000	2		296800000	0
5944000000	5		5944000000	11		743000000	1		297200000	3
5952000000	14		5952000000	7		744000000	1		297600000	1
5960000000	9		5960000000	4		745000000	0		298000000	3
5968000000	15		5968000000	5		746000000	0		298400000	2
5976000000	19		5976000000	5		747000000	3		298800000	1
5984000000	12		5984000000	9		748000000	2		299200000	3
5992000000	19		5992000000	6		749000000	0		299600000	1
6000000000	15		6000000000	4		750000000	1		300000000	2
6008000000	15		6008000000	7		751000000	2		300400000	3
6016000000	12		6016000000	5		752000000	1		300800000	4
6024000000	12		6024000000	5		753000000	0		301200000	2
6032000000	13		6032000000	4		754000000	5		301600000	0
6040000000	10		6040000000	8		755000000	0		302000000	2
6048000000	10		6048000000	4		756000000	0		302400000	1
6056000000	9		6056000000	5		757000000	1		302800000	3
6064000000	19		6064000000	8		758000000	1		303200000	4
6072000000	9		6072000000	7		759000000	2		303600000	0
6080000000	7		6080000000	6		760000000	2		304000000	2
6088000000	11		6088000000	7		761000000	0		304400000	1
6096000000	10		6096000000	3		762000000	0		304800000	1
6104000000	6		6104000000	7		763000000	1		305200000	2
6112000000	8		6112000000	8		764000000	2		305600000	1
6120000000	9		6120000000	7		765000000	0		306000000	1
6128000000	6		6128000000	3		766000000	1		306400000	1
6136000000	10		6136000000	2		767000000	0		306800000	3
6144000000	5		6144000000	3		768000000	1		307200000	4
6152000000	11		6152000000	5		769000000	4		307600000	0
6160000000	12		6160000000	6		770000000	1		308000000	3
6168000000	9		6168000000	7		771000000	0		308400000	2
6176000000	8		6176000000	4		772000000	3		308800000	1
6184000000	9		6184000000	8		773000000	1		309200000	3
6192000000	10		6192000000	4		774000000	0		309600000	2
6200000000	7		6200000000	6		775000000	0		310000000	3
6208000000	16		6208000000	2		776000000	0		310400000	7
6216000000	6		6216000000	4		777000000	1		310800000	0
6224000000	10		6224000000	2		778000000	1		311200000	1
6232000000	6		6232000000	3		779000000	2		311600000	1
6240000000	6		6240000000	8		780000000	2		312000000	2
6248000000	15		6248000000	3		781000000	1		312400000	2
6256000000	5		6256000000	5		782000000	0		312800000	0
6264000000	4		6264000000	3		783000000	1		313200000	1
6272000000	7		6272000000	5		784000000	0		313600000	3
6280000000	6		6280000000	6		785000000	1		314000000	1
6288000000	6		6288000000	7		786000000	1		314400000	0
6296000000	11		6296000000	0		787000000	0		314800000	3
6304000000	8		6304000000	3		788000000	0		315200000	1
6312000000	11		6312000000	4		789000000	3		315600000	1
6320000000	8		6320000000	4		790000000	4		316000000	1
6328000000	8		6328000000	6		791000000	1		316400000	0
6336000000	3		6336000000	5		792000000	3		316800000	0
6344000000	8		6344000000	6		793000000	0		317200000	1
6352000000	6		6352000000	2		794000000	2		317600000	2
6360000000	6		6360000000	5		795000000	0		318000000	0
6368000000	1		6368000000	2		796000000	0		318400000	1
6376000000	12		6376000000	4		797000000	3		318800000	2
6384000000	18		6384000000	3		798000000	0		319200000	5
6392000000	10		6392000000	3		799000000	2		319600000	1
6400000000	10		6400000000	5		800000000	2		320000000	1
6408000000	9		6408000000	3		801000000	0		320400000	0
6416000000	11		6416000000	3		802000000	0		320800000	1
6424000000	10		6424000000	7		803000000	2		321200000	2
6432000000	12		6432000000	4		804000000	0		321600000	3
6440000000	10		6440000000	3		805000000	2		322000000	3
6448000000	7		6448000000	3		806000000	0		322400000	2
6456000000	13		6456000000	4		807000000	1		322800000	1
6464000000	11		6464000000	3		808000000	0		323200000	2
6472000000	13		6472000000	4		809000000	2		323600000	2
6480000000	8		6480000000	4		810000000	0		324000000	1
6488000000	7		6488000000	5		811000000	2		324400000	0
6496000000	11		6496000000	4		812000000	1		324800000	1
6504000000	10		6504000000	1		813000000	1		325200000	1
6512000000	6		6512000000	0		814000000	3		325600000	1
6520000000	3		6520000000	5		815000000	0		326000000	3
6528000000	9		6528000000	3		816000000	1		326400000	1
6536000000	8		6536000000	3		817000000	0		326800000	2
6544000000	6		6544000000	2		818000000	2		327200000	1
6552000000	5		6552000000	5		819000000	2		327600000	2
6560000000	8		6560000000	2		820000000	0		328000000	0
6568000000	4		6568000000	2		821000000	1		328400000	1
6576000000	8		6576000000	6		822000000	2		328800000	0
6584000000	6		6584000000	2		823000000	3		329200000	0
6592000000	8		6592000000	6		824000000	1		329600000	1
6600000000	10		6600000000	4		825000000	0		330000000	1
6608000000	8		6608000000	3		826000000	2		330400000	3
6616000000	10		6616000000	1		827000000	2		330800000	0
6624000000	2		6624000000	6		828000000	2		331200000	0
6632000000	7		6632000000	6		829000000	2		331600000	2
6640000000	7		6640000000	4		830000000	0		332000000	2
6648000000	10		6648000000	1		831000000	1		332400000	0
6656000000	4		6656000000	2		832000000	2		332800000	3
6664000000	9		6664000000	6		833000000	1		333200000	2
6672000000	2		6672000000	6		834000000	1		333600000	3
6680000000	7		6680000000	4		835000000	10		334000000	1
6688000000	5		6688000000	7		836000000	1		334400000	4
6696000000	7		6696000000	4		837000000	0		334800000	2
6704000000	10		6704000000	5		838000000	0		335200000	1
6712000000	12		6712000000	2		839000000	1		335600000	3
6720000000	1		6720000000	1		840000000	1		336000000	0
6728000000	5		6728000000	6		841000000	1		336400000	1
6736000000	9		6736000000	2		842000000	0		336800000	2
6744000000	3		6744000000	3		843000000	2		337200000	0
6752000000	6		6752000000	1		844000000	0		337600000	6
6760000000	8		6760000000	4		845000000	0		338000000	1
6768000000	5		6768000000	3		846000000	0		338400000	1
6776000000	8		6776000000	1		847000000	0		338800000	2
6784000000	3		6784000000	2		848000000	0		339200000	2
6792000000	5		6792000000	4		849000000	2		339600000	3
6800000000	6		6800000000	3		850000000	1		340000000	1
6808000000	7		6808000000	2		851000000	0		340400000	2
6816000000	5		6816000000	1		852000000	1		340800000	0
6824000000	7		6824000000	4		853000000	0		341200000	2
6832000000	7		6832000000	2		854000000	0		341600000	3
6840000000	4		6840000000	2		855000000	0		342000000	0
6848000000	3		6848000000	2		856000000	0		342400000	1
6856000000	4		6856000000	4		857000000	1		342800000	2
6864000000	5		6864000000	4		858000000	1		343200000	1
6872000000	5		6872000000	4		859000000	1		343600000	0
6880000000	4		6880000000	1		860000000	1		344000000	0
6888000000	7		6888000000	4		861000000	0		344400000	0
6896000000	3		6896000000	3		862000000	0		344800000	2
6904000000	3		6904000000	2		863000000	2		345200000	2
6912000000	10		6912000000	3		864000000	0		345600000	1
6920000000	9		6920000000	3		865000000	1		346000000	2
6928000000	3		6928000000	4		866000000	0		346400000	6
6936000000	6		6936000000	1		867000000	1		346800000	2
6944000000	3		6944000000	0		868000000	1		347200000	1
6952000000	4		6952000000	2		869000000	2		347600000	1
6960000000	7		6960000000	5		870000000	0		348000000	3
6968000000	7		6968000000	2		871000000	1		348400000	0
6976000000	6		6976000000	4		872000000	1		348800000	2
6984000000	7		6984000000	1		873000000	0		349200000	0
6992000000	7		6992000000	3		874000000	0		349600000	0
7000000000	8		7000000000	2		875000000	1		350000000	0
7008000000	5		7008000000	3		876000000	1		350400000	2
7016000000	8		7016000000	2		877000000	1		350800000	0
7024000000	4		7024000000	1		878000000	0		351200000	0
7032000000	4		7032000000	3		879000000	2		351600000	0
7040000000	7		7040000000	3		880000000	0		352000000	0
7048000000	6		7048000000	4		881000000	2		352400000	1
7056000000	5		7056000000	2		882000000	2		352800000	1
7064000000	2		7064000000	1		883000000	1		353200000	0
7072000000	6		7072000000	1		884000000	2		353600000	1
7080000000	8		7080000000	3		885000000	1		354000000	2
7088000000	3		7088000000	4		886000000	1		354400000	1
7096000000	4		7096000000	3		887000000	0		354800000	2
7104000000	10		7104000000	1		888000000	1		355200000	6
7112000000	5		7112000000	3		889000000	2		355600000	0
7120000000	4		7120000000	2		890000000	2		356000000	1
7128000000	7		7128000000	3		891000000	1		356400000	1
7136000000	3		7136000000	7		892000000	2		356800000	1
7144000000	4		7144000000	3		893000000	0		357200000	1
7152000000	4		7152000000	4		894000000	1		357600000	2
7160000000	2		7160000000	6		895000000	2		358000000	1
7168000000	2		7168000000	1		896000000	0		358400000	1
7176000000	1		7176000000	4		897000000	0		358800000	1
7184000000	5		7184000000	0		898000000	0		359200000	0
7192000000	6		7192000000	3		899000000	1		359600000	1
7200000000	6		7200000000	1		900000000	1		360000000	2
7208000000	5		7208000000	1		901000000	5		360400000	1
7216000000	3		7216000000	6		902000000	1		360800000	2
7224000000	6		7224000000	3		903000000	0		361200000	1
7232000000	7		7232000000	3		904000000	1		361600000	2
7240000000	4		7240000000	1		905000000	1		362000000	2
7248000000	5		7248000000	2		906000000	1		362400000	1
7256000000	4		7256000000	1		907000000	0		362800000	1
7264000000	3		7264000000	1		908000000	1		363200000	0
7272000000	2		7272000000	3		909000000	0		363600000	0
7280000000	4		7280000000	3		910000000	4		364000000	3
7288000000	7		7288000000	2		911000000	0		364400000	0
7296000000	4		7296000000	2		912000000	0		364800000	0
7304000000	3		7304000000	2		913000000	0		365200000	4
7312000000	5		7312000000	3		914000000	0		365600000	1
7320000000	6		7320000000	1		915000000	0		366000000	0
7328000000	2		7328000000	3		916000000	0		366400000	0
7336000000	1		7336000000	1		917000000	0		366800000	0
7344000000	3		7344000000	3		918000000	2		367200000	1
7352000000	7		7352000000	3		919000000	0		367600000	0
7360000000	5		7360000000	4		920000000	2		368000000	3
7368000000	5		7368000000	1		921000000	1		368400000	0
7376000000	4		7376000000	3		922000000	1		368800000	3
7384000000	4		7384000000	1		923000000	1		369200000	0
7392000000	4		7392000000	0		924000000	2		369600000	0
7400000000	5		7400000000	4		925000000	2		370000000	3
7408000000	1		7408000000	2		926000000	1		370400000	2
7416000000	2		7416000000	2		927000000	1		370800000	0
7424000000	6		7424000000	1		928000000	1		371200000	2
7432000000	6		7432000000	2		929000000	2		371600000	1
7440000000	6		7440000000	2		930000000	1		372000000	0
7448000000	1		7448000000	1		931000000	1		372400000	1
7456000000	7		7456000000	1		932000000	1		372800000	1
7464000000	3		7464000000	5		933000000	0		373200000	0
7472000000	8		7472000000	4		934000000	0		373600000	1
7480000000	7		7480000000	1		935000000	0		374000000	2
7488000000	1		7488000000	3		936000000	1		374400000	0
7496000000	6		7496000000	3		937000000	2		374800000	2
7504000000	2		7504000000	3		938000000	0		375200000	0
7512000000	3		7512000000	3		939000000	0		375600000	0
7520000000	3		7520000000	6		940000000	1		376000000	0
7528000000	3		7528000000	4		941000000	0		376400000	0
7536000000	3		7536000000	2		942000000	0		376800000	0
7544000000	3		7544000000	0		943000000	2		377200000	3
7552000000	1		7552000000	2		944000000	0		377600000	1
7560000000	3		7560000000	3		945000000	2		378000000	0
7568000000	4		7568000000	1		946000000	0		378400000	0
7576000000	4		7576000000	4		947000000	0		378800000	1
7584000000	2		7584000000	1		948000000	1		379200000	2
7592000000	1		7592000000	2		949000000	2		379600000	1
7600000000	6		7600000000	4		950000000	1		380000000	1
7608000000	4		7608000000	0		951000000	2		380400000	0
7616000000	2		7616000000	0		952000000	1		380800000	1
7624000000	2		7624000000	1		953000000	2		381200000	1
7632000000	5		7632000000	2		954000000	1		381600000	1
7640000000	1		7640000000	1		955000000	0		382000000	0
7648000000	5		7648000000	0		956000000	0		382400000	2
7656000000	0		7656000000	3		957000000	0		382800000	1
7664000000	8		7664000000	2		958000000	0		383200000	0
7672000000	4		7672000000	0		959000000	0		383600000	1
7680000000	2		7680000000	2		960000000	2		384000000	0
7688000000	3		7688000000	1		961000000	0		384400000	0
7696000000	3		7696000000	2		962000000	1		384800000	1
7704000000	9		7704000000	3		963000000	0		385200000	2
7712000000	3		7712000000	3		964000000	0		385600000	0
7720000000	2		7720000000	1		965000000	1		386000000	3
7728000000	6		7728000000	1		966000000	0		386400000	0
7736000000	4		7736000000	1		967000000	0		386800000	0
7744000000	3		7744000000	0		968000000	1		387200000	1
7752000000	1		7752000000	1		969000000	1		387600000	0
7760000000	4		7760000000	0		970000000	0		388000000	0
7768000000	1		7768000000	1		971000000	1		388400000	1
7776000000	2		7776000000	0		972000000	0		388800000	0
7784000000	1		7784000000	3		973000000	1		389200000	1
7792000000	5		7792000000	1		974000000	0		389600000	1
7800000000	2		7800000000	5		975000000	0		390000000	0
7808000000	4		7808000000	4		976000000	0		390400000	0
7816000000	6		7816000000	3		977000000	0		390800000	1
7824000000	1		7824000000	1		978000000	0		391200000	0
7832000000	1		7832000000	3		979000000	4		391600000	1
7840000000	2		7840000000	2		980000000	0		392000000	2
7848000000	3		7848000000	0		981000000	0		392400000	1
7856000000	3		7856000000	1		982000000	0		392800000	1
7864000000	4		7864000000	2		983000000	1		393200000	0
7872000000	1		7872000000	1		984000000	0		393600000	1
7880000000	2		7880000000	0		985000000	1		394000000	1
7888000000	1		7888000000	2		986000000	0		394400000	0
7896000000	1		7896000000	2		987000000	0		394800000	1
7904000000	1		7904000000	1		988000000	0		395200000	2
7912000000	2		7912000000	3		989000000	1		395600000	0
7920000000	2		7920000000	0		990000000	1		396000000	0
7928000000	4		7928000000	1		991000000	0		396400000	1
7936000000	6		7936000000	1		992000000	0		396800000	1
7944000000	5		7944000000	3		993000000	0		397200000	0
7952000000	2		7952000000	2		994000000	1		397600000	1
7960000000	2		7960000000	6		995000000	0		398000000	1
7968000000	4		7968000000	5		996000000	1		398400000	0
7976000000	2		7976000000	2		997000000	0		398800000	0
7984000000	2		7984000000	1		998000000	0		399200000	1
7992000000	3		7992000000	1		999000000	0		399600000	3

[truncated: 10 more sheets: Fig. 3e, Fig. 3f, Fig. 3g, Fig. 3h, Fig. 3i, Fig. 5a, Fig. 5b, Fig. 5c, Fig. 6b(above), Fig. 6b(below)]
